# Supplementary material for: Proteomic Analysis of Pure Human Airway Gland Mucus Reveals a Large Component of Protective Proteins
Source: PLoS One. 2015 Feb 23;10(2):e0116756. doi: 10.1371/journal.pone.0116756 (PMC4338240; doi:10.1371/journal.pone.0116756)
Supplement: S7 Table — (XLSX) [file pone.0116756.s007.xlsx]

## Sheet: HN 1-3 Proteins
	Table S7. HN Proteins with additional MS/MS information.
Experiment name	Sample name	MS/MS sample name	Identified protein name	Accession #	Database sources	MW (Da)	Protein identification probability	Exclusive unique peptide count	Exclusive unique spectrum count	Total spectrum count	Percentage of total spectra	Percentage sequence coverage
HN-SMG-Mucus	HN-1	02.RAW (F013047)	Transgelin-2 OS=Homo sapiens GN=TAGLN2 PE=1 SV=3	P37802	SwissProt_2012_09.fasta	22391.9	1	3	3	3	0.000254	0.266
HN-SMG-Mucus	HN-1	02.RAW (F013047)	L-lactate dehydrogenase B chain OS=Homo sapiens GN=LDHB PE=1 SV=2	P07195	SwissProt_2012_09.fasta	36638.6	1	4	4	5	0.000423	0.156
HN-SMG-Mucus	HN-1	02.RAW (F013047)	Arachidonate 15-lipoxygenase OS=Homo sapiens GN=ALOX15 PE=1 SV=3	P16050	SwissProt_2012_09.fasta	74805.9	1	5	6	7	0.000592	0.104
HN-SMG-Mucus	HN-1	02.RAW (F013047)	60S acidic ribosomal protein P0 OS=Homo sapiens GN=RPLP0 PE=1 SV=1	P05388	SwissProt_2012_09.fasta	34274.3	0.998	2	2	2	0.000169	0.101
HN-SMG-Mucus	HN-1	02.RAW (F013047)	60S acidic ribosomal protein P2 OS=Homo sapiens GN=RPLP2 PE=1 SV=1	P05387	SwissProt_2012_09.fasta	11665.5	0.998	2	2	3	0.000254	0.391
HN-SMG-Mucus	HN-1	02.RAW (F013047)	Alpha-1-antichymotrypsin OS=Homo sapiens GN=SERPINA3 PE=1 SV=2	P01011	SwissProt_2012_09.fasta	47653	1	5	5	5	0.000423	0.147
HN-SMG-Mucus	HN-1	02.RAW (F013047)	Staphylococcal nuclease domain-containing protein 1 OS=Homo sapiens GN=SND1 PE=1 SV=1	Q7KZF4	SwissProt_2012_09.fasta	101998	0.998	2	2	2	0.000169	0.033
HN-SMG-Mucus	HN-1	02.RAW (F013047)	Tubulin beta-4B chain OS=Homo sapiens GN=TUBB4B PE=1 SV=1	P68371	SwissProt_2012_09.fasta	49830.7	0.998	2	2	2	0.000169	0.126
HN-SMG-Mucus	HN-1	02.RAW (F013047)	Thymidine phosphorylase OS=Homo sapiens GN=TYMP PE=1 SV=2	P19971	SwissProt_2012_09.fasta	49955.8	1	3	3	3	0.000254	0.0768
HN-SMG-Mucus	HN-1	02.RAW (F013047)	Fibrinogen gamma chain OS=Homo sapiens GN=FGG PE=1 SV=3	P02679	SwissProt_2012_09.fasta	51513.3	1	3	4	4	0.000338	0.0773
HN-SMG-Mucus	HN-1	02.RAW (F013047)	Fibrinogen alpha chain OS=Homo sapiens GN=FGA PE=1 SV=2	P02671	SwissProt_2012_09.fasta	94973.4	1	8	9	11	0.00093	0.127
HN-SMG-Mucus	HN-1	02.RAW (F013047)	Peroxiredoxin-1 OS=Homo sapiens GN=PRDX1 PE=1 SV=1	Q06830	SwissProt_2012_09.fasta	22110.9	0.996	2	2	2	0.000169	0.0955
HN-SMG-Mucus	HN-1	02.RAW (F013047)	Vitamin D-binding protein OS=Homo sapiens GN=GC PE=1 SV=1	P02774	SwissProt_2012_09.fasta	52964.6	1	2	2	3	0.000254	0.0717
HN-SMG-Mucus	HN-1	02.RAW (F013047)	Complement C3 OS=Homo sapiens GN=C3 PE=1 SV=2	P01024	SwissProt_2012_09.fasta	187149	1	12	12	12	0.00101	0.105
HN-SMG-Mucus	HN-1	02.RAW (F013047)	Chloride intracellular channel protein 1 OS=Homo sapiens GN=CLIC1 PE=1 SV=4	O00299	SwissProt_2012_09.fasta	26923.3	0.998	2	2	2	0.000169	0.124
HN-SMG-Mucus	HN-1	02.RAW (F013047)	Proteasome subunit alpha type-7 OS=Homo sapiens GN=PSMA7 PE=1 SV=1	O14818	SwissProt_2012_09.fasta	27887.2	0.998	2	2	2	0.000169	0.101
HN-SMG-Mucus	HN-1	02.RAW (F013047)	Protein disulfide-isomerase A6 OS=Homo sapiens GN=PDIA6 PE=1 SV=1	Q15084	SwissProt_2012_09.fasta	48122.3	0.998	2	2	2	0.000169	0.0841
HN-SMG-Mucus	HN-1	02.RAW (F013047)	Apolipoprotein A-II OS=Homo sapiens GN=APOA2 PE=1 SV=1	P02652	SwissProt_2012_09.fasta	11175.3	0.998	2	2	2	0.000169	0.29
HN-SMG-Mucus	HN-1	02.RAW (F013047)	2-oxoglutarate dehydrogenase, mitochondrial OS=Homo sapiens GN=OGDH PE=1 SV=3	Q02218	SwissProt_2012_09.fasta	115937	0.999	2	2	2	0.000169	0.0235
HN-SMG-Mucus	HN-1	02.RAW (F013047)	Apolipoprotein A-I OS=Homo sapiens GN=APOA1 PE=1 SV=1	P02647	SwissProt_2012_09.fasta	30778.5	1	4	4	4	0.000338	0.18
HN-SMG-Mucus	HN-1	02.RAW (F013047)	Thioredoxin-dependent peroxide reductase, mitochondrial OS=Homo sapiens GN=PRDX3 PE=1 SV=3	P30048	SwissProt_2012_09.fasta	27692.7	0.998	2	2	2	0.000169	0.102
HN-SMG-Mucus	HN-1	02.RAW (F013047)	T-complex protein 1 subunit theta OS=Homo sapiens GN=CCT8 PE=1 SV=4	P50990	SwissProt_2012_09.fasta	59621	1	5	5	6	0.000507	0.109
HN-SMG-Mucus	HN-1	02.RAW (F013047)	Protein S100-A6 OS=Homo sapiens GN=S100A6 PE=1 SV=1	P06703	SwissProt_2012_09.fasta	10180.4	0.998	2	2	2	0.000169	0.167
HN-SMG-Mucus	HN-1	02.RAW (F013047)	60S ribosomal protein L12 OS=Homo sapiens GN=RPL12 PE=1 SV=1	P30050	SwissProt_2012_09.fasta	17819.1	0.998	2	2	2	0.000169	0.188
HN-SMG-Mucus	HN-1	02.RAW (F013047)	Plastin-2 OS=Homo sapiens GN=LCP1 PE=1 SV=6	P13796	SwissProt_2012_09.fasta	70291.2	1	4	5	5	0.000423	0.105
HN-SMG-Mucus	HN-1	02.RAW (F013047)	Aldehyde dehydrogenase, dimeric NADP-preferring OS=Homo sapiens GN=ALDH3A1 PE=1 SV=3	P30838	SwissProt_2012_09.fasta	50395.7	1	7	7	7	0.000592	0.219
HN-SMG-Mucus	HN-1	02.RAW (F013047)	Eukaryotic initiation factor 4A-I OS=Homo sapiens GN=EIF4A1 PE=1 SV=1	P60842	SwissProt_2012_09.fasta	46155.3	1	3	3	3	0.000254	0.0764
HN-SMG-Mucus	HN-1	02.RAW (F013047)	Plectin OS=Homo sapiens GN=PLEC PE=1 SV=3	Q15149	SwissProt_2012_09.fasta	531784	1	16	17	18	0.00152	0.0386
HN-SMG-Mucus	HN-1	02.RAW (F013047)	DNA-dependent protein kinase catalytic subunit OS=Homo sapiens GN=PRKDC PE=1 SV=3	P78527	SwissProt_2012_09.fasta	469096	0.998	2	3	3	0.000254	0.00654
HN-SMG-Mucus	HN-1	02.RAW (F013047)	ATP synthase subunit b, mitochondrial OS=Homo sapiens GN=ATP5F1 PE=1 SV=2	P24539	SwissProt_2012_09.fasta	28908.8	0.998	2	2	2	0.000169	0.0625
HN-SMG-Mucus	HN-1	02.RAW (F013047)	Heat shock protein beta-1 OS=Homo sapiens GN=HSPB1 PE=1 SV=2	P04792	SwissProt_2012_09.fasta	22782.6	1	4	4	4	0.000338	0.19
HN-SMG-Mucus	HN-1	02.RAW (F013047)	Cullin-associated NEDD8-dissociated protein 1 OS=Homo sapiens GN=CAND1 PE=1 SV=2	Q86VP6	SwissProt_2012_09.fasta	136381	0.998	2	2	2	0.000169	0.0228
HN-SMG-Mucus	HN-1	02.RAW (F013047)	Far upstream element-binding protein 2 OS=Homo sapiens GN=KHSRP PE=1 SV=4	Q92945	SwissProt_2012_09.fasta	73115.6	0.998	2	2	2	0.000169	0.0338
HN-SMG-Mucus	HN-1	02.RAW (F013047)	Protein arginine N-methyltransferase 1 OS=Homo sapiens GN=PRMT1 PE=1 SV=2	Q99873	SwissProt_2012_09.fasta	41516.1	0.998	2	2	2	0.000169	0.0748
HN-SMG-Mucus	HN-1	02.RAW (F013047)	ATP synthase subunit beta, mitochondrial OS=Homo sapiens GN=ATP5B PE=1 SV=3	P06576	SwissProt_2012_09.fasta	56560.6	1	4	5	7	0.000592	0.104
HN-SMG-Mucus	HN-1	02.RAW (F013047)	Pulmonary surfactant-associated protein A2 OS=Homo sapiens GN=SFTPA2 PE=1 SV=1	Q8IWL1,Q8IWL2	SwissProt_2012_09.fasta	26182.3	0.998	2	2	2	0.000169	0.133
HN-SMG-Mucus	HN-1	02.RAW (F013047)	60S ribosomal protein L18 OS=Homo sapiens GN=RPL18 PE=1 SV=2	Q07020	SwissProt_2012_09.fasta	21635.2	0.998	2	2	2	0.000169	0.128
HN-SMG-Mucus	HN-1	02.RAW (F013047)	Endoplasmin OS=Homo sapiens GN=HSP90B1 PE=1 SV=1	P14625	SwissProt_2012_09.fasta	92471.7	1	8	8	8	0.000676	0.139
HN-SMG-Mucus	HN-1	02.RAW (F013047)	Tubulin alpha-1B chain OS=Homo sapiens GN=TUBA1B PE=1 SV=1	P68363	SwissProt_2012_09.fasta	50151.7	0.998	2	2	4	0.000338	0.0532
HN-SMG-Mucus	HN-1	02.RAW (F013047)	Proteasome subunit alpha type-3 OS=Homo sapiens GN=PSMA3 PE=1 SV=2	P25788	SwissProt_2012_09.fasta	28433.7	0.998	2	2	2	0.000169	0.0863
HN-SMG-Mucus	HN-1	02.RAW (F013047)	Keratin, type I cytoskeletal 17 OS=Homo sapiens GN=KRT17 PE=1 SV=2	Q04695	SwissProt_2012_09.fasta	48106.7	1	8	9	9	0.000761	0.292
HN-SMG-Mucus	HN-1	02.RAW (F013047)	UDP-glucose:glycoprotein glucosyltransferase 1 OS=Homo sapiens GN=UGGT1 PE=1 SV=3	Q9NYU2	SwissProt_2012_09.fasta	177195	0.998	2	2	2	0.000169	0.018
HN-SMG-Mucus	HN-1	02.RAW (F013047)	Glutathione S-transferase P OS=Homo sapiens GN=GSTP1 PE=1 SV=2	P09211	SwissProt_2012_09.fasta	23356.7	1	3	4	5	0.000423	0.252
HN-SMG-Mucus	HN-1	02.RAW (F013047)	ATP synthase subunit alpha, mitochondrial OS=Homo sapiens GN=ATP5A1 PE=1 SV=1	P25705	SwissProt_2012_09.fasta	59752.1	1	3	3	3	0.000254	0.0868
HN-SMG-Mucus	HN-1	02.RAW (F013047)	Peptidyl-prolyl cis-trans isomerase A OS=Homo sapiens GN=PPIA PE=1 SV=2	P62937	SwissProt_2012_09.fasta	18012.9	0.998	2	2	2	0.000169	0.194
HN-SMG-Mucus	HN-1	02.RAW (F013047)	Moesin OS=Homo sapiens GN=MSN PE=1 SV=3	P26038	SwissProt_2012_09.fasta	67821.8	1	4	4	4	0.000338	0.078
HN-SMG-Mucus	HN-1	02.RAW (F013047)	Alcohol dehydrogenase class 4 mu/sigma chain OS=Homo sapiens GN=ADH7 PE=1 SV=2	P40394	SwissProt_2012_09.fasta	41481.4	1	4	5	6	0.000507	0.142
HN-SMG-Mucus	HN-1	02.RAW (F013047)	14-3-3 protein theta OS=Homo sapiens GN=YWHAQ PE=1 SV=1	P27348	SwissProt_2012_09.fasta	27765.4	1	2	2	2	0.000169	0.188
HN-SMG-Mucus	HN-1	02.RAW (F013047)	40S ribosomal protein S9 OS=Homo sapiens GN=RPS9 PE=1 SV=3	P46781	SwissProt_2012_09.fasta	22592.5	0.998	2	2	2	0.000169	0.0876
HN-SMG-Mucus	HN-1	02.RAW (F013047)	Cytosol aminopeptidase OS=Homo sapiens GN=LAP3 PE=1 SV=3	P28838	SwissProt_2012_09.fasta	56167.8	1	3	3	3	0.000254	0.0848
HN-SMG-Mucus	HN-1	02.RAW (F013047)	Coatomer subunit beta' OS=Homo sapiens GN=COPB2 PE=1 SV=2	P35606	SwissProt_2012_09.fasta	102489	0.999	2	2	2	0.000169	0.0309
HN-SMG-Mucus	HN-1	02.RAW (F013047)	Tenascin OS=Homo sapiens GN=TNC PE=1 SV=3	P24821	SwissProt_2012_09.fasta	240850	1	3	3	3	0.000254	0.0195
HN-SMG-Mucus	HN-1	02.RAW (F013047)	Prominin-1 OS=Homo sapiens GN=PROM1 PE=1 SV=1	O43490	SwissProt_2012_09.fasta	97206.4	0.998	2	2	2	0.000169	0.0439
HN-SMG-Mucus	HN-1	02.RAW (F013047)	Vimentin OS=Homo sapiens GN=VIM PE=1 SV=4	P08670	SwissProt_2012_09.fasta	53652.7	1	5	5	5	0.000423	0.101
HN-SMG-Mucus	HN-1	02.RAW (F013047)	Fructose-bisphosphate aldolase A OS=Homo sapiens GN=ALDOA PE=1 SV=2	P04075	SwissProt_2012_09.fasta	39420.6	1	5	5	5	0.000423	0.192
HN-SMG-Mucus	HN-1	02.RAW (F013047)	WAP four-disulfide core domain protein 2 OS=Homo sapiens GN=WFDC2 PE=1 SV=2	Q14508	SwissProt_2012_09.fasta	12992.5	0.998	2	3	3	0.000254	0.258
HN-SMG-Mucus	HN-1	02.RAW (F013047)	Neutrophil gelatinase-associated lipocalin OS=Homo sapiens GN=LCN2 PE=1 SV=2	P80188	SwissProt_2012_09.fasta	22588.9	1	4	4	5	0.000423	0.333
HN-SMG-Mucus	HN-1	02.RAW (F013047)	Elongation factor 1-delta OS=Homo sapiens GN=EEF1D PE=1 SV=5	P29692	SwissProt_2012_09.fasta	31121.9	0.998	2	2	2	0.000169	0.0854
HN-SMG-Mucus	HN-1	02.RAW (F013047)	Junction plakoglobin OS=Homo sapiens GN=JUP PE=1 SV=3	P14923	SwissProt_2012_09.fasta	81745.9	0.998	2	3	3	0.000254	0.0322
HN-SMG-Mucus	HN-1	02.RAW (F013047)	Scavenger receptor cysteine-rich type 1 protein M130 OS=Homo sapiens GN=CD163 PE=1 SV=2	Q86VB7	SwissProt_2012_09.fasta	125447	1	7	7	7	0.000592	0.0787
HN-SMG-Mucus	HN-1	02.RAW (F013047)	Collagen alpha-3(VI) chain OS=Homo sapiens GN=COL6A3 PE=1 SV=5	P12111	SwissProt_2012_09.fasta	343667	0.998	2	2	2	0.000169	0.0085
HN-SMG-Mucus	HN-1	02.RAW (F013047)	Stress-70 protein, mitochondrial OS=Homo sapiens GN=HSPA9 PE=1 SV=2	P38646	SwissProt_2012_09.fasta	73681.3	1	3	3	3	0.000254	0.0471
HN-SMG-Mucus	HN-1	02.RAW (F013047)	Profilin-1 OS=Homo sapiens GN=PFN1 PE=1 SV=2	P07737	SwissProt_2012_09.fasta	15054.3	1	3	4	5	0.000423	0.3
HN-SMG-Mucus	HN-1	02.RAW (F013047)	Annexin A4 OS=Homo sapiens GN=ANXA4 PE=1 SV=4	P09525	SwissProt_2012_09.fasta	35884.3	0.998	2	2	2	0.000169	0.0878
HN-SMG-Mucus	HN-1	02.RAW (F013047)	40S ribosomal protein S8 OS=Homo sapiens GN=RPS8 PE=1 SV=2	P62241	SwissProt_2012_09.fasta	24206.4	0.998	2	3	3	0.000254	0.12
HN-SMG-Mucus	HN-1	02.RAW (F013047)	T-complex protein 1 subunit alpha OS=Homo sapiens GN=TCP1 PE=1 SV=1	P17987	SwissProt_2012_09.fasta	60345.2	0.998	2	2	2	0.000169	0.0683
HN-SMG-Mucus	HN-1	02.RAW (F013047)	26S protease regulatory subunit 6A OS=Homo sapiens GN=PSMC3 PE=1 SV=3	P17980	SwissProt_2012_09.fasta	49205	0.998	2	2	2	0.000169	0.0661
HN-SMG-Mucus	HN-1	02.RAW (F013047)	Coatomer subunit beta OS=Homo sapiens GN=COPB1 PE=1 SV=3	P53618	SwissProt_2012_09.fasta	107146	0.998	2	2	2	0.000169	0.0241
HN-SMG-Mucus	HN-1	02.RAW (F013047)	Clathrin heavy chain 1 OS=Homo sapiens GN=CLTC PE=1 SV=5	Q00610	SwissProt_2012_09.fasta	191619	1	6	6	6	0.000507	0.0513
HN-SMG-Mucus	HN-1	02.RAW (F013047)	Coatomer subunit alpha OS=Homo sapiens GN=COPA PE=1 SV=2	P53621	SwissProt_2012_09.fasta	138349	1	3	4	4	0.000338	0.0449
HN-SMG-Mucus	HN-1	02.RAW (F013047)	Leukocyte elastase inhibitor OS=Homo sapiens GN=SERPINB1 PE=1 SV=1	P30740	SwissProt_2012_09.fasta	42743.8	0.998	2	2	2	0.000169	0.0607
HN-SMG-Mucus	HN-1	02.RAW (F013047)	Mucin-5B OS=Homo sapiens GN=MUC5B PE=1 SV=3	Q9HC84	SwissProt_2012_09.fasta	596324	1	25	34	45	0.0038	0.0639
HN-SMG-Mucus	HN-1	02.RAW (F013047)	Cytochrome c oxidase subunit 2 OS=Homo sapiens GN=MT-CO2 PE=1 SV=1	P00403	SwissProt_2012_09.fasta	25566.4	0.995	2	2	2	0.000169	0.128
HN-SMG-Mucus	HN-1	02.RAW (F013047)	Keratin, type II cytoskeletal 2 epidermal OS=Homo sapiens GN=KRT2 PE=1 SV=2	P35908	SwissProt_2012_09.fasta	65433.9	0.999	2	2	2	0.000169	0.114
HN-SMG-Mucus	HN-1	02.RAW (F013047)	Serine/arginine-rich splicing factor 7 OS=Homo sapiens GN=SRSF7 PE=1 SV=1	Q16629	SwissProt_2012_09.fasta	27367.5	0.998	2	2	2	0.000169	0.109
HN-SMG-Mucus	HN-1	02.RAW (F013047)	Arginine--tRNA ligase, cytoplasmic OS=Homo sapiens GN=RARS PE=1 SV=2	P54136	SwissProt_2012_09.fasta	75382	0.998	2	2	2	0.000169	0.047
HN-SMG-Mucus	HN-1	02.RAW (F013047)	Ubiquitin-like modifier-activating enzyme 1 OS=Homo sapiens GN=UBA1 PE=1 SV=3	P22314	SwissProt_2012_09.fasta	117850	1	3	3	3	0.000254	0.0416
HN-SMG-Mucus	HN-1	02.RAW (F013047)	Zymogen granule protein 16 homolog B OS=Homo sapiens GN=ZG16B PE=1 SV=3	Q96DA0	SwissProt_2012_09.fasta	22739.4	0.996	2	2	2	0.000169	0.139
HN-SMG-Mucus	HN-1	02.RAW (F013047)	Enoyl-CoA hydratase, mitochondrial OS=Homo sapiens GN=ECHS1 PE=1 SV=4	P30084	SwissProt_2012_09.fasta	31388.2	0.998	2	2	2	0.000169	0.131
HN-SMG-Mucus	HN-1	02.RAW (F013047)	Protein disulfide-isomerase A3 OS=Homo sapiens GN=PDIA3 PE=1 SV=4	P30101	SwissProt_2012_09.fasta	56784.6	1	4	4	4	0.000338	0.0752
HN-SMG-Mucus	HN-1	02.RAW (F013047)	Ceruloplasmin OS=Homo sapiens GN=CP PE=1 SV=1	P00450	SwissProt_2012_09.fasta	122208	1	6	6	6	0.000507	0.0704
HN-SMG-Mucus	HN-1	02.RAW (F013047)	Complement factor B OS=Homo sapiens GN=CFB PE=1 SV=2	P00751	SwissProt_2012_09.fasta	85533.2	0.998	2	3	5	0.000423	0.0524
HN-SMG-Mucus	HN-1	02.RAW (F013047)	Proteasome subunit beta type-2 OS=Homo sapiens GN=PSMB2 PE=1 SV=1	P49721	SwissProt_2012_09.fasta	22837.5	0.998	2	2	2	0.000169	0.129
HN-SMG-Mucus	HN-1	02.RAW (F013047)	Keratin, type II cytoskeletal 6A OS=Homo sapiens GN=KRT6A PE=1 SV=3	P02538	SwissProt_2012_09.fasta	60046.4	1	11	12	13	0.0011	0.324
HN-SMG-Mucus	HN-1	02.RAW (F013047)	Prohibitin OS=Homo sapiens GN=PHB PE=1 SV=1	P35232	SwissProt_2012_09.fasta	29804.6	1	3	3	3	0.000254	0.11
HN-SMG-Mucus	HN-1	02.RAW (F013047)	Ig kappa chain V-III region SIE OS=Homo sapiens PE=1 SV=1	P01620,P01623	SwissProt_2012_09.fasta	11775.4	1	3	3	4	0.000338	0.394
HN-SMG-Mucus	HN-1	02.RAW (F013047)	Tryptophan--tRNA ligase, cytoplasmic OS=Homo sapiens GN=WARS PE=1 SV=2	P23381	SwissProt_2012_09.fasta	53167.6	1	4	4	5	0.000423	0.14
HN-SMG-Mucus	HN-1	02.RAW (F013047)	Myoferlin OS=Homo sapiens GN=MYOF PE=1 SV=1	Q9NZM1	SwissProt_2012_09.fasta	234716	1	3	3	3	0.000254	0.0165
HN-SMG-Mucus	HN-1	02.RAW (F013047)	Complement factor H OS=Homo sapiens GN=CFH PE=1 SV=4	P08603	SwissProt_2012_09.fasta	139096	1	4	4	4	0.000338	0.0471
HN-SMG-Mucus	HN-1	02.RAW (F013047)	40S ribosomal protein S3 OS=Homo sapiens GN=RPS3 PE=1 SV=2	P23396	SwissProt_2012_09.fasta	26688.6	0.998	2	2	2	0.000169	0.119
HN-SMG-Mucus	HN-1	02.RAW (F013047)	Alpha-1-antitrypsin OS=Homo sapiens GN=SERPINA1 PE=1 SV=3	P01009	SwissProt_2012_09.fasta	46737.9	1	3	3	3	0.000254	0.115
HN-SMG-Mucus	HN-1	02.RAW (F013047)	14-3-3 protein eta OS=Homo sapiens GN=YWHAH PE=1 SV=4	Q04917	SwissProt_2012_09.fasta	28219.6	0.998	2	2	2	0.000169	0.171
HN-SMG-Mucus	HN-1	02.RAW (F013047)	Proteasome activator complex subunit 1 OS=Homo sapiens GN=PSME1 PE=1 SV=1	Q06323	SwissProt_2012_09.fasta	28723.9	1	3	3	3	0.000254	0.149
HN-SMG-Mucus	HN-1	02.RAW (F013047)	116 kDa U5 small nuclear ribonucleoprotein component OS=Homo sapiens GN=EFTUD2 PE=1 SV=1	Q15029	SwissProt_2012_09.fasta	109438	0.998	2	2	2	0.000169	0.034
HN-SMG-Mucus	HN-1	02.RAW (F013047)	Annexin A1 OS=Homo sapiens GN=ANXA1 PE=1 SV=2	P04083	SwissProt_2012_09.fasta	38715.9	1	6	8	8	0.000676	0.182
HN-SMG-Mucus	HN-1	02.RAW (F013047)	Serine/arginine-rich splicing factor 1 OS=Homo sapiens GN=SRSF1 PE=1 SV=2	Q07955	SwissProt_2012_09.fasta	27745.1	1	3	3	3	0.000254	0.145
HN-SMG-Mucus	HN-1	02.RAW (F013047)	ATP-dependent RNA helicase A OS=Homo sapiens GN=DHX9 PE=1 SV=4	Q08211	SwissProt_2012_09.fasta	140962	0.998	2	2	2	0.000169	0.022
HN-SMG-Mucus	HN-1	02.RAW (F013047)	Keratin, type II cytoskeletal 5 OS=Homo sapiens GN=KRT5 PE=1 SV=3	P13647	SwissProt_2012_09.fasta	62379.6	1	12	14	22	0.00186	0.219
HN-SMG-Mucus	HN-1	02.RAW (F013047)	Keratin, type I cytoskeletal 13 OS=Homo sapiens GN=KRT13 PE=1 SV=4	P13646	SwissProt_2012_09.fasta	49589.3	1	10	11	14	0.00118	0.352
HN-SMG-Mucus	HN-1	02.RAW (F013047)	Keratin, type I cytoskeletal 10 OS=Homo sapiens GN=KRT10 PE=1 SV=6	P13645	SwissProt_2012_09.fasta	58828.8	1	7	8	9	0.000761	0.255
HN-SMG-Mucus	HN-1	02.RAW (F013047)	Erythrocyte band 7 integral membrane protein OS=Homo sapiens GN=STOM PE=1 SV=3	P27105	SwissProt_2012_09.fasta	31732.1	1	3	3	3	0.000254	0.167
HN-SMG-Mucus	HN-1	02.RAW (F013047)	Myosin-9 OS=Homo sapiens GN=MYH9 PE=1 SV=4	P35579	SwissProt_2012_09.fasta	226538	1	11	12	12	0.00101	0.0765
HN-SMG-Mucus	HN-1	02.RAW (F013047)	Keratin, type II cytoskeletal 4 OS=Homo sapiens GN=KRT4 PE=1 SV=4	P19013	SwissProt_2012_09.fasta	57286.1	1	3	3	4	0.000338	0.0824
HN-SMG-Mucus	HN-1	02.RAW (F013047)	Keratin, type I cytoskeletal 15 OS=Homo sapiens GN=KRT15 PE=1 SV=3	P19012	SwissProt_2012_09.fasta	49212.9	1	5	5	5	0.000423	0.318
HN-SMG-Mucus	HN-1	02.RAW (F013047)	X-ray repair cross-complementing protein 5 OS=Homo sapiens GN=XRCC5 PE=1 SV=3	P13010	SwissProt_2012_09.fasta	82707.1	1	4	4	4	0.000338	0.0956
HN-SMG-Mucus	HN-1	02.RAW (F013047)	Adenylyl cyclase-associated protein 1 OS=Homo sapiens GN=CAP1 PE=1 SV=5	Q01518	SwissProt_2012_09.fasta	51901.6	1	3	5	5	0.000423	0.112
HN-SMG-Mucus	HN-1	02.RAW (F013047)	Malate dehydrogenase, mitochondrial OS=Homo sapiens GN=MDH2 PE=1 SV=3	P40926	SwissProt_2012_09.fasta	35503.7	1	4	4	4	0.000338	0.172
HN-SMG-Mucus	HN-1	02.RAW (F013047)	Malate dehydrogenase, cytoplasmic OS=Homo sapiens GN=MDH1 PE=1 SV=4	P40925	SwissProt_2012_09.fasta	36426.9	0.998	2	2	2	0.000169	0.0868
HN-SMG-Mucus	HN-1	02.RAW (F013047)	Heat shock protein HSP 90-beta OS=Homo sapiens GN=HSP90AB1 PE=1 SV=4	P08238	SwissProt_2012_09.fasta	83267.3	1	7	8	9	0.000761	0.128
HN-SMG-Mucus	HN-1	02.RAW (F013047)	Cathepsin D OS=Homo sapiens GN=CTSD PE=1 SV=1	P07339	SwissProt_2012_09.fasta	44553	1	5	6	6	0.000507	0.201
HN-SMG-Mucus	HN-1	02.RAW (F013047)	Kinesin-1 heavy chain OS=Homo sapiens GN=KIF5B PE=1 SV=1	P33176	SwissProt_2012_09.fasta	109686	0.998	2	2	2	0.000169	0.0239
HN-SMG-Mucus	HN-1	02.RAW (F013047)	14-3-3 protein zeta/delta OS=Homo sapiens GN=YWHAZ PE=1 SV=1	P63104	SwissProt_2012_09.fasta	27745.9	1	4	4	5	0.000423	0.188
HN-SMG-Mucus	HN-1	02.RAW (F013047)	Anterior gradient protein 2 homolog OS=Homo sapiens GN=AGR2 PE=1 SV=1	O95994	SwissProt_2012_09.fasta	19980.3	0.998	2	3	3	0.000254	0.16
HN-SMG-Mucus	HN-1	02.RAW (F013047)	Clusterin OS=Homo sapiens GN=CLU PE=1 SV=1	P10909	SwissProt_2012_09.fasta	52495	1	4	4	4	0.000338	0.107
HN-SMG-Mucus	HN-1	02.RAW (F013047)	14-3-3 protein beta/alpha OS=Homo sapiens GN=YWHAB PE=1 SV=3	P31946	SwissProt_2012_09.fasta	28083.1	1	4	5	6	0.000507	0.305
HN-SMG-Mucus	HN-1	02.RAW (F013047)	ATP synthase subunit delta, mitochondrial OS=Homo sapiens GN=ATP5D PE=1 SV=2	P30049	SwissProt_2012_09.fasta	17489.9	0.998	2	2	2	0.000169	0.137
HN-SMG-Mucus	HN-1	02.RAW (F013047)	Peroxiredoxin-5, mitochondrial OS=Homo sapiens GN=PRDX5 PE=1 SV=4	P30044	SwissProt_2012_09.fasta	22086.4	1	3	3	3	0.000254	0.187
HN-SMG-Mucus	HN-1	02.RAW (F013047)	Endoplasmic reticulum resident protein 29 OS=Homo sapiens GN=ERP29 PE=1 SV=4	P30040	SwissProt_2012_09.fasta	28994.9	1	3	3	3	0.000254	0.195
HN-SMG-Mucus	HN-1	02.RAW (F013047)	Cytoplasmic dynein 1 heavy chain 1 OS=Homo sapiens GN=DYNC1H1 PE=1 SV=5	Q14204	SwissProt_2012_09.fasta	532406	1	5	5	5	0.000423	0.0168
HN-SMG-Mucus	HN-1	02.RAW (F013047)	Leucine-rich PPR motif-containing protein, mitochondrial OS=Homo sapiens GN=LRPPRC PE=1 SV=3	P42704	SwissProt_2012_09.fasta	157912	1	4	4	4	0.000338	0.0359
HN-SMG-Mucus	HN-1	02.RAW (F013047)	Cytochrome b-c1 complex subunit 1, mitochondrial OS=Homo sapiens GN=UQCRC1 PE=1 SV=3	P31930	SwissProt_2012_09.fasta	52645.9	0.998	2	2	2	0.000169	0.0417
HN-SMG-Mucus	HN-1	02.RAW (F013047)	3-hydroxyacyl-CoA dehydrogenase type-2 OS=Homo sapiens GN=HSD17B10 PE=1 SV=3	Q99714	SwissProt_2012_09.fasta	26923.1	0.998	2	2	2	0.000169	0.165
HN-SMG-Mucus	HN-1	02.RAW (F013047)	Keratin, type I cytoskeletal 9 OS=Homo sapiens GN=KRT9 PE=1 SV=3	P35527	SwissProt_2012_09.fasta	62065.9	1	3	3	3	0.000254	0.0851
HN-SMG-Mucus	HN-1	02.RAW (F013047)	Alpha-actinin-4 OS=Homo sapiens GN=ACTN4 PE=1 SV=2	O43707	SwissProt_2012_09.fasta	104857	1	8	8	8	0.000676	0.105
HN-SMG-Mucus	HN-1	02.RAW (F013047)	Immunoglobulin lambda-like polypeptide 5 OS=Homo sapiens GN=IGLL5 PE=2 SV=2	B9A064	SwissProt_2012_09.fasta	23062.9	0.998	2	2	4	0.000338	0.182
HN-SMG-Mucus	HN-1	02.RAW (F013047)	Pyruvate dehydrogenase E1 component subunit beta, mitochondrial OS=Homo sapiens GN=PDHB PE=1 SV=3	P11177	SwissProt_2012_09.fasta	39233.4	0.998	2	3	3	0.000254	0.0891
HN-SMG-Mucus	HN-1	02.RAW (F013047)	Tubulin beta chain OS=Homo sapiens GN=TUBB PE=1 SV=2	P07437	SwissProt_2012_09.fasta	49670.6	1	6	7	7	0.000592	0.16
HN-SMG-Mucus	HN-1	02.RAW (F013047)	Histone H4 OS=Homo sapiens GN=HIST1H4A PE=1 SV=2	P62805	SwissProt_2012_09.fasta	11367.7	1	3	3	4	0.000338	0.291
HN-SMG-Mucus	HN-1	02.RAW (F013047)	Nucleolin OS=Homo sapiens GN=NCL PE=1 SV=3	P19338	SwissProt_2012_09.fasta	76615.9	1	4	4	4	0.000338	0.0803
HN-SMG-Mucus	HN-1	02.RAW (F013047)	BPI fold-containing family B member 1 OS=Homo sapiens GN=BPIFB1 PE=2 SV=1	Q8TDL5	SwissProt_2012_09.fasta	52443.8	1	7	8	10	0.000845	0.211
HN-SMG-Mucus	HN-1	02.RAW (F013047)	Heat shock cognate 71 kDa protein OS=Homo sapiens GN=HSPA8 PE=1 SV=1	P11142	SwissProt_2012_09.fasta	70899.8	1	5	6	6	0.000507	0.141
HN-SMG-Mucus	HN-1	02.RAW (F013047)	Glyceraldehyde-3-phosphate dehydrogenase OS=Homo sapiens GN=GAPDH PE=1 SV=3	P04406	SwissProt_2012_09.fasta	36053.4	1	3	3	3	0.000254	0.137
HN-SMG-Mucus	HN-1	02.RAW (F013047)	Glutamate dehydrogenase 1, mitochondrial OS=Homo sapiens GN=GLUD1 PE=1 SV=2	P00367	SwissProt_2012_09.fasta	61399.7	1	3	3	3	0.000254	0.0717
HN-SMG-Mucus	HN-1	02.RAW (F013047)	Tropomyosin alpha-3 chain OS=Homo sapiens GN=TPM3 PE=1 SV=1	P06753	SwissProt_2012_09.fasta	32820.2	1	3	3	3	0.000254	0.102
HN-SMG-Mucus	HN-1	02.RAW (F013047)	Fatty acid synthase OS=Homo sapiens GN=FASN PE=1 SV=3	P49327	SwissProt_2012_09.fasta	273427	1	3	3	3	0.000254	0.0155
HN-SMG-Mucus	HN-1	02.RAW (F013047)	Retinal dehydrogenase 1 OS=Homo sapiens GN=ALDH1A1 PE=1 SV=2	P00352	SwissProt_2012_09.fasta	54862.8	0.998	2	2	2	0.000169	0.0499
HN-SMG-Mucus	HN-1	02.RAW (F013047)	Nucleophosmin OS=Homo sapiens GN=NPM1 PE=1 SV=2	P06748	SwissProt_2012_09.fasta	32575.5	0.998	2	4	5	0.000423	0.119
HN-SMG-Mucus	HN-1	02.RAW (F013047)	Ig heavy chain V-III region BRO OS=Homo sapiens PE=1 SV=1	P01766	SwissProt_2012_09.fasta	13226.8	0.998	2	3	3	0.000254	0.25
HN-SMG-Mucus	HN-1	02.RAW (F013047)	Alpha-enolase OS=Homo sapiens GN=ENO1 PE=1 SV=2	P06733	SwissProt_2012_09.fasta	47170.2	1	4	4	4	0.000338	0.157
HN-SMG-Mucus	HN-1	02.RAW (F013047)	L-lactate dehydrogenase A chain OS=Homo sapiens GN=LDHA PE=1 SV=2	P00338	SwissProt_2012_09.fasta	36689.2	1	4	5	5	0.000423	0.136
HN-SMG-Mucus	HN-1	02.RAW (F013047)	Enhancer of rudimentary homolog OS=Homo sapiens GN=ERH PE=1 SV=1	P84090	SwissProt_2012_09.fasta	12259.3	0.998	2	2	2	0.000169	0.212
HN-SMG-Mucus	HN-1	02.RAW (F013047)	Selenium-binding protein 1 OS=Homo sapiens GN=SELENBP1 PE=1 SV=2	Q13228	SwissProt_2012_09.fasta	52392	0.998	2	2	2	0.000169	0.0508
HN-SMG-Mucus	HN-1	02.RAW (F013047)	Major vault protein OS=Homo sapiens GN=MVP PE=1 SV=4	Q14764	SwissProt_2012_09.fasta	99326	1	7	7	8	0.000676	0.0997
HN-SMG-Mucus	HN-1	02.RAW (F013047)	Heterogeneous nuclear ribonucleoprotein M OS=Homo sapiens GN=HNRNPM PE=1 SV=3	P52272	SwissProt_2012_09.fasta	77517.3	0.999	2	2	2	0.000169	0.0356
HN-SMG-Mucus	HN-1	02.RAW (F013047)	Thioredoxin OS=Homo sapiens GN=TXN PE=1 SV=3	P10599	SwissProt_2012_09.fasta	11737.3	0.998	2	2	2	0.000169	0.21
HN-SMG-Mucus	HN-1	02.RAW (F013047)	Fibrinogen beta chain OS=Homo sapiens GN=FGB PE=1 SV=2	P02675	SwissProt_2012_09.fasta	55928.6	1	7	10	15	0.00127	0.206
HN-SMG-Mucus	HN-1	02.RAW (F013047)	Proactivator polypeptide OS=Homo sapiens GN=PSAP PE=1 SV=2	P07602	SwissProt_2012_09.fasta	58112	1	3	4	5	0.000423	0.0687
HN-SMG-Mucus	HN-1	02.RAW (F013047)	Ras-related protein Rap-1b OS=Homo sapiens GN=RAP1B PE=1 SV=1	P61224	SwissProt_2012_09.fasta	20824.9	0.998	2	2	2	0.000169	0.125
HN-SMG-Mucus	HN-1	02.RAW (F013047)	Filamin-A OS=Homo sapiens GN=FLNA PE=1 SV=4	P21333	SwissProt_2012_09.fasta	280729	1	3	3	3	0.000254	0.0212
HN-SMG-Mucus	HN-1	02.RAW (F013047)	Immunoglobulin J chain OS=Homo sapiens GN=IGJ PE=1 SV=4	P01591	SwissProt_2012_09.fasta	18098.5	0.999	2	2	3	0.000254	0.17
HN-SMG-Mucus	HN-1	02.RAW (F013047)	BPI fold-containing family A member 1 OS=Homo sapiens GN=BPIFA1 PE=1 SV=1	Q9NP55	SwissProt_2012_09.fasta	26714.1	0.998	2	2	3	0.000254	0.0977
HN-SMG-Mucus	HN-1	02.RAW (F013047)	Serpin B3 OS=Homo sapiens GN=SERPINB3 PE=1 SV=2	P29508	SwissProt_2012_09.fasta	44565.9	1	2	2	2	0.000169	0.0718
HN-SMG-Mucus	HN-1	02.RAW (F013047)	40S ribosomal protein SA OS=Homo sapiens GN=RPSA PE=1 SV=4	P08865	SwissProt_2012_09.fasta	32854.1	1	5	5	5	0.000423	0.217
HN-SMG-Mucus	HN-1	02.RAW (F013047)	Ras GTPase-activating-like protein IQGAP1 OS=Homo sapiens GN=IQGAP1 PE=1 SV=1	P46940	SwissProt_2012_09.fasta	189259	1	3	3	3	0.000254	0.0247
HN-SMG-Mucus	HN-1	02.RAW (F013047)	Myeloperoxidase OS=Homo sapiens GN=MPO PE=1 SV=1	P05164	SwissProt_2012_09.fasta	83871.1	1	7	7	7	0.000592	0.129
HN-SMG-Mucus	HN-1	02.RAW (F013047)	Keratin, type II cytoskeletal 1 OS=Homo sapiens GN=KRT1 PE=1 SV=6	P04264	SwissProt_2012_09.fasta	66040.3	1	9	11	12	0.00101	0.182
HN-SMG-Mucus	HN-1	02.RAW (F013047)	Tumor-associated calcium signal transducer 2 OS=Homo sapiens GN=TACSTD2 PE=1 SV=3	P09758	SwissProt_2012_09.fasta	35709.8	1	3	5	5	0.000423	0.136
HN-SMG-Mucus	HN-1	02.RAW (F013047)	6-phosphogluconate dehydrogenase, decarboxylating OS=Homo sapiens GN=PGD PE=1 SV=3	P52209	SwissProt_2012_09.fasta	53141.9	1	3	3	3	0.000254	0.0932
HN-SMG-Mucus	HN-1	02.RAW (F013047)	SAM domain and HD domain-containing protein 1 OS=Homo sapiens GN=SAMHD1 PE=1 SV=2	Q9Y3Z3	SwissProt_2012_09.fasta	72202.7	1	3	4	4	0.000338	0.0735
HN-SMG-Mucus	HN-1	02.RAW (F013047)	ADP/ATP translocase 2 OS=Homo sapiens GN=SLC25A5 PE=1 SV=7	P05141	SwissProt_2012_09.fasta	32853.5	0.998	2	2	2	0.000169	0.0839
HN-SMG-Mucus	HN-1	02.RAW (F013047)	Myosin light polypeptide 6 OS=Homo sapiens GN=MYL6 PE=1 SV=2	P60660	SwissProt_2012_09.fasta	16929.8	1	3	4	4	0.000338	0.212
HN-SMG-Mucus	HN-1	02.RAW (F013047)	Protein SET OS=Homo sapiens GN=SET PE=1 SV=3	Q01105	SwissProt_2012_09.fasta	33489.4	0.999	2	2	2	0.000169	0.0862
HN-SMG-Mucus	HN-1	02.RAW (F013047)	Heat shock protein HSP 90-alpha OS=Homo sapiens GN=HSP90AA1 PE=1 SV=5	P07900	SwissProt_2012_09.fasta	84663.2	0.998	2	3	3	0.000254	0.0943
HN-SMG-Mucus	HN-1	02.RAW (F013047)	T-complex protein 1 subunit delta OS=Homo sapiens GN=CCT4 PE=1 SV=4	P50991	SwissProt_2012_09.fasta	57926	1	3	3	3	0.000254	0.108
HN-SMG-Mucus	HN-1	02.RAW (F013047)	Poly(rC)-binding protein 1 OS=Homo sapiens GN=PCBP1 PE=1 SV=2	Q15365	SwissProt_2012_09.fasta	37498.2	1	3	3	4	0.000338	0.0983
HN-SMG-Mucus	HN-1	02.RAW (F013047)	Heterogeneous nuclear ribonucleoprotein A3 OS=Homo sapiens GN=HNRNPA3 PE=1 SV=2	P51991	SwissProt_2012_09.fasta	39595.1	0.998	2	2	2	0.000169	0.0847
HN-SMG-Mucus	HN-1	02.RAW (F013047)	Neuroblast differentiation-associated protein AHNAK OS=Homo sapiens GN=AHNAK PE=1 SV=2	Q09666	SwissProt_2012_09.fasta	629104	1	3	3	3	0.000254	0.00849
HN-SMG-Mucus	HN-1	02.RAW (F013047)	Gelsolin OS=Homo sapiens GN=GSN PE=1 SV=1	P06396	SwissProt_2012_09.fasta	85697.8	1	6	6	6	0.000507	0.106
HN-SMG-Mucus	HN-1	02.RAW (F013047)	Ornithine aminotransferase, mitochondrial OS=Homo sapiens GN=OAT PE=1 SV=1	P04181	SwissProt_2012_09.fasta	48536.2	1	5	6	6	0.000507	0.148
HN-SMG-Mucus	HN-1	02.RAW (F013047)	Lactotransferrin OS=Homo sapiens GN=LTF PE=1 SV=6	P02788	SwissProt_2012_09.fasta	78182.3	1	14	17	26	0.0022	0.282
HN-SMG-Mucus	HN-1	02.RAW (F013047)	Serotransferrin OS=Homo sapiens GN=TF PE=1 SV=3	P02787	SwissProt_2012_09.fasta	77064.3	1	7	8	9	0.000761	0.136
HN-SMG-Mucus	HN-1	02.RAW (F013047)	Transitional endoplasmic reticulum ATPase OS=Homo sapiens GN=VCP PE=1 SV=4	P55072	SwissProt_2012_09.fasta	89324.8	1	7	7	8	0.000676	0.117
HN-SMG-Mucus	HN-1	02.RAW (F013047)	Proteasome activator complex subunit 2 OS=Homo sapiens GN=PSME2 PE=1 SV=4	Q9UL46	SwissProt_2012_09.fasta	27402.3	0.998	2	2	2	0.000169	0.113
HN-SMG-Mucus	HN-1	02.RAW (F013047)	Ig alpha-1 chain C region OS=Homo sapiens GN=IGHA1 PE=1 SV=2	P01876	SwissProt_2012_09.fasta	37653.8	1	6	7	10	0.000845	0.227
HN-SMG-Mucus	HN-1	02.RAW (F013047)	Ig mu chain C region OS=Homo sapiens GN=IGHM PE=1 SV=3	P01871	SwissProt_2012_09.fasta	49305.7	1	4	5	5	0.000423	0.104
HN-SMG-Mucus	HN-1	02.RAW (F013047)	ATP synthase subunit O, mitochondrial OS=Homo sapiens GN=ATP5O PE=1 SV=1	P48047	SwissProt_2012_09.fasta	23277.4	0.998	2	2	2	0.000169	0.183
HN-SMG-Mucus	HN-1	02.RAW (F013047)	Serum albumin OS=Homo sapiens GN=ALB PE=1 SV=2	P02768	SwissProt_2012_09.fasta	69366.9	1	13	16	24	0.00203	0.23
HN-SMG-Mucus	HN-1	02.RAW (F013047)	Hemoglobin subunit alpha OS=Homo sapiens GN=HBA1 PE=1 SV=2	P69905	SwissProt_2012_09.fasta	15257.6	0.998	2	3	3	0.000254	0.148
HN-SMG-Mucus	HN-1	02.RAW (F013047)	Ig gamma-1 chain C region OS=Homo sapiens GN=IGHG1 PE=1 SV=1	P01857	SwissProt_2012_09.fasta	36105	1	5	6	9	0.000761	0.218
HN-SMG-Mucus	HN-1	02.RAW (F013047)	Hemoglobin subunit beta OS=Homo sapiens GN=HBB PE=1 SV=2	P68871	SwissProt_2012_09.fasta	15998	1	4	6	14	0.00118	0.367
HN-SMG-Mucus	HN-1	02.RAW (F013047)	Ezrin OS=Homo sapiens GN=EZR PE=1 SV=4	P15311	SwissProt_2012_09.fasta	69414.7	0.999	2	2	3	0.000254	0.0751
HN-SMG-Mucus	HN-1	02.RAW (F013047)	Serum amyloid P-component OS=Homo sapiens GN=APCS PE=1 SV=2	P02743	SwissProt_2012_09.fasta	25387.7	1	3	3	3	0.000254	0.139
HN-SMG-Mucus	HN-1	02.RAW (F013047)	Protein-glutamine gamma-glutamyltransferase 2 OS=Homo sapiens GN=TGM2 PE=1 SV=2	P21980	SwissProt_2012_09.fasta	77329.1	1	3	3	3	0.000254	0.0611
HN-SMG-Mucus	HN-1	02.RAW (F013047)	Protein disulfide-isomerase OS=Homo sapiens GN=P4HB PE=1 SV=3	P07237	SwissProt_2012_09.fasta	57118.1	1	4	4	4	0.000338	0.118
HN-SMG-Mucus	HN-1	02.RAW (F013047)	60 kDa heat shock protein, mitochondrial OS=Homo sapiens GN=HSPD1 PE=1 SV=2	P10809	SwissProt_2012_09.fasta	61055.7	1	5	6	6	0.000507	0.108
HN-SMG-Mucus	HN-1	02.RAW (F013047)	Ig kappa chain C region OS=Homo sapiens GN=IGKC PE=1 SV=1	P01834	SwissProt_2012_09.fasta	11608.6	1	3	5	14	0.00118	0.509
HN-SMG-Mucus	HN-1	02.RAW (F013047)	Polymeric immunoglobulin receptor OS=Homo sapiens GN=PIGR PE=1 SV=4	P01833	SwissProt_2012_09.fasta	83283.4	1	10	10	13	0.0011	0.175
HN-SMG-Mucus	HN-1	02.RAW (F013047)	Prohibitin-2 OS=Homo sapiens GN=PHB2 PE=1 SV=2	Q99623	SwissProt_2012_09.fasta	33297.6	0.998	2	2	2	0.000169	0.104
HN-SMG-Mucus	HN-1	02.RAW (F013047)	Annexin A7 OS=Homo sapiens GN=ANXA7 PE=1 SV=3	P20073	SwissProt_2012_09.fasta	52740.5	1	3	3	3	0.000254	0.0758
HN-SMG-Mucus	HN-1	02.RAW (F013047)	Cytochrome c oxidase subunit 4 isoform 1, mitochondrial OS=Homo sapiens GN=COX4I1 PE=1 SV=1	P13073	SwissProt_2012_09.fasta	19576.8	0.997	2	2	2	0.000169	0.13
HN-SMG-Mucus	HN-1	02.RAW (F013047)	Haptoglobin OS=Homo sapiens GN=HP PE=1 SV=1	P00738	SwissProt_2012_09.fasta	45204.9	0.999	2	2	3	0.000254	0.0591
HN-SMG-Mucus	HN-1	02.RAW (F013047)	Alpha-2-macroglobulin OS=Homo sapiens GN=A2M PE=1 SV=3	P01023	SwissProt_2012_09.fasta	163290	1	7	7	7	0.000592	0.0611
HN-SMG-Mucus	HN-1	02.RAW (F013047)	Prelamin-A/C OS=Homo sapiens GN=LMNA PE=1 SV=1	P02545	SwissProt_2012_09.fasta	74140.7	1	10	11	12	0.00101	0.184
HN-SMG-Mucus	HN-1	02.RAW (F013047)	T-complex protein 1 subunit beta OS=Homo sapiens GN=CCT2 PE=1 SV=4	P78371	SwissProt_2012_09.fasta	57489.9	1	3	3	3	0.000254	0.0897
HN-SMG-Mucus	HN-1	02.RAW (F013047)	Keratin, type II cytoskeletal 8 OS=Homo sapiens GN=KRT8 PE=1 SV=7	P05787	SwissProt_2012_09.fasta	53706.2	1	11	15	16	0.00135	0.267
HN-SMG-Mucus	HN-1	02.RAW (F013047)	Keratin, type I cytoskeletal 18 OS=Homo sapiens GN=KRT18 PE=1 SV=2	P05783	SwissProt_2012_09.fasta	48059	1	4	6	7	0.000592	0.205
HN-SMG-Mucus	HN-1	02.RAW (F013047)	Prothymosin alpha OS=Homo sapiens GN=PTMA PE=1 SV=2	P06454	SwissProt_2012_09.fasta	12202.5	0.998	2	2	2	0.000169	0.117
HN-SMG-Mucus	HN-1	02.RAW (F013047)	IgGFc-binding protein OS=Homo sapiens GN=FCGBP PE=1 SV=3	Q9Y6R7	SwissProt_2012_09.fasta	571983	1	9	10	11	0.00093	0.0241
HN-SMG-Mucus	HN-1	02.RAW (F013047)	Elongation factor 1-alpha 1 OS=Homo sapiens GN=EEF1A1 PE=1 SV=1	P68104,Q5VTE0	SwissProt_2012_09.fasta	50141.2	0.999	2	2	2	0.000169	0.0931
HN-SMG-Mucus	HN-1	02.RAW (F013047)	Annexin A2 OS=Homo sapiens GN=ANXA2 PE=1 SV=2	P07355	SwissProt_2012_09.fasta	38606.1	1	4	5	7	0.000592	0.153
HN-SMG-Mucus	HN-1	02.RAW (F013047)	WD repeat-containing protein 1 OS=Homo sapiens GN=WDR1 PE=1 SV=4	O75083	SwissProt_2012_09.fasta	66193.2	0.998	2	2	2	0.000169	0.0479
HN-SMG-Mucus	HN-1	02.RAW (F013047)	Heat shock 70 kDa protein 1A/1B OS=Homo sapiens GN=HSPA1A PE=1 SV=5	P08107	SwissProt_2012_09.fasta	70054	1	5	6	6	0.000507	0.122
HN-SMG-Mucus	HN-1	02.RAW (F013047)	Pyruvate kinase isozymes M1/M2 OS=Homo sapiens GN=PKM PE=1 SV=4	P14618	SwissProt_2012_09.fasta	57937.5	1	7	8	8	0.000676	0.181
HN-SMG-Mucus	HN-1	02.RAW (F013047)	Keratin, type I cytoskeletal 19 OS=Homo sapiens GN=KRT19 PE=1 SV=4	P08727	SwissProt_2012_09.fasta	44107.1	1	17	21	27	0.00228	0.525
HN-SMG-Mucus	HN-1	02.RAW (F013047)	Peroxiredoxin-2 OS=Homo sapiens GN=PRDX2 PE=1 SV=5	P32119	SwissProt_2012_09.fasta	21892.4	0.999	2	2	2	0.000169	0.187
HN-SMG-Mucus	HN-1	02.RAW (F013047)	Neutral alpha-glucosidase AB OS=Homo sapiens GN=GANAB PE=1 SV=3	Q14697	SwissProt_2012_09.fasta	106876	0.998	2	2	2	0.000169	0.0254
HN-SMG-Mucus	HN-1	02.RAW (F013047)	78 kDa glucose-regulated protein OS=Homo sapiens GN=HSPA5 PE=1 SV=2	P11021	SwissProt_2012_09.fasta	72334.7	1	4	4	4	0.000338	0.121
HN-SMG-Mucus	HN-1	02.RAW (F013047)	Erlin-2 OS=Homo sapiens GN=ERLIN2 PE=1 SV=1	O94905	SwissProt_2012_09.fasta	37840.4	0.998	2	2	2	0.000169	0.0708
HN-SMG-Mucus	HN-1	02.RAW (F013047)	Beta-2-glycoprotein 1 OS=Homo sapiens GN=APOH PE=1 SV=3	P02749	SwissProt_2012_09.fasta	38298.5	1	2	2	2	0.000169	0.0667
HN-SMG-Mucus	HN-1	02.RAW (F013047)	Rab GDP dissociation inhibitor beta OS=Homo sapiens GN=GDI2 PE=1 SV=2	P50395	SwissProt_2012_09.fasta	50665.5	0.998	2	2	2	0.000169	0.0607
HN-SMG-Mucus	HN-1	02.RAW (F013047)	Ribosome-binding protein 1 OS=Homo sapiens GN=RRBP1 PE=1 SV=4	Q9P2E9	SwissProt_2012_09.fasta	152471	1	2	2	2	0.000169	0.0213
HN-SMG-Mucus	HN-1	02.RAW (F013047)	Triosephosphate isomerase OS=Homo sapiens GN=TPI1 PE=1 SV=3	P60174	SwissProt_2012_09.fasta	30790.8	1	4	4	5	0.000423	0.22
HN-SMG-Mucus	HN-1	02.RAW (F013047)	Ig lambda-2 chain C regions OS=Homo sapiens GN=IGLC2 PE=1 SV=1	P0CG05,P0CG06	SwissProt_2012_09.fasta	11293.2	0.998	2	3	8	0.000676	0.462
HN-SMG-Mucus	HN-1	02.RAW (F013047)	Myosin regulatory light chain 12B OS=Homo sapiens GN=MYL12B PE=1 SV=2	O14950,P19105	SwissProt_2012_09.fasta	19795.3	0.998	2	2	2	0.000169	0.122
HN-SMG-Mucus	HN-1	02.RAW (F013047)	Actin-related protein 3 OS=Homo sapiens GN=ACTR3 PE=1 SV=3	P61158	SwissProt_2012_09.fasta	47371.9	0.998	2	2	2	0.000169	0.0813
HN-SMG-Mucus	HN-1	02.RAW (F013047)	Complement C4-B OS=Homo sapiens GN=C4B PE=1 SV=1	P0C0L5	SwissProt_2012_09.fasta	192795	1	7	8	8	0.000676	0.0522
HN-SMG-Mucus	HN-1	02.RAW (F013047)	Aldehyde dehydrogenase, mitochondrial OS=Homo sapiens GN=ALDH2 PE=1 SV=2	P05091	SwissProt_2012_09.fasta	56381.4	1	5	5	5	0.000423	0.106
HN-SMG-Mucus	HN-1	02.RAW (F013047)	Serum amyloid A-2 protein OS=Homo sapiens GN=SAA2 PE=1 SV=1	P0DJI9	SwissProt_2012_09.fasta	13527.7	0.998	2	2	2	0.000169	0.303
HN-SMG-Mucus	HN-1	02.RAW (F013047)	Superoxide dismutase [Mn], mitochondrial OS=Homo sapiens GN=SOD2 PE=1 SV=2	P04179	SwissProt_2012_09.fasta	24722.6	1	3	3	4	0.000338	0.131
HN-SMG-Mucus	HN-1	02.RAW (F013047)	HLA class I histocompatibility antigen, Cw-12 alpha chain OS=Homo sapiens GN=HLA-C PE=1 SV=2	P30508,Q07000	SwissProt_2012_09.fasta	40862.3	1	3	3	3	0.000254	0.0929
HN-SMG-Mucus	HN-1	02.RAW (F013047)	Transketolase OS=Homo sapiens GN=TKT PE=1 SV=3	P29401	SwissProt_2012_09.fasta	67879.4	0.998	2	2	2	0.000169	0.0433
HN-SMG-Mucus	HN-1	02.RAW (F013047)	T-complex protein 1 subunit epsilon OS=Homo sapiens GN=CCT5 PE=1 SV=1	P48643	SwissProt_2012_09.fasta	59672.4	0.998	2	2	2	0.000169	0.061
HN-SMG-Mucus	HN-1	02.RAW (F013047)	Annexin A5 OS=Homo sapiens GN=ANXA5 PE=1 SV=2	P08758	SwissProt_2012_09.fasta	35938.6	1	5	6	7	0.000592	0.25
HN-SMG-Mucus	HN-1	02.RAW (F013047)	Desmoplakin OS=Homo sapiens GN=DSP PE=1 SV=3	P15924	SwissProt_2012_09.fasta	331781	1	6	6	6	0.000507	0.0327
HN-SMG-Mucus	HN-1	02.RAW (F013047)	Alpha-1B-glycoprotein OS=Homo sapiens GN=A1BG PE=1 SV=4	P04217	SwissProt_2012_09.fasta	54253.3	0.998	2	3	3	0.000254	0.0687
HN-SMG-Mucus	HN-1	02.RAW (F013047)	Phosphoglycerate kinase 1 OS=Homo sapiens GN=PGK1 PE=1 SV=3	P00558	SwissProt_2012_09.fasta	44615.3	1	5	5	5	0.000423	0.146
HN-SMG-Mucus	HN-1	02.RAW (F013047)	HLA class II histocompatibility antigen, DRB1-8 beta chain OS=Homo sapiens GN=HLA-DRB1 PE=1 SV=2	Q30134	SwissProt_2012_09.fasta	30003.4	0.998	2	2	2	0.000169	0.0827
HN-SMG-Mucus	HN-1	02.RAW (F013047)	Dolichyl-diphosphooligosaccharide--protein glycosyltransferase 48 kDa subunit OS=Homo sapiens GN=DDOST PE=1 SV=4	P39656	SwissProt_2012_09.fasta	50802.5	0.998	2	2	2	0.000169	0.0636
HN-SMG-Mucus	HN-1	02.RAW (F013047)	Filamin-B OS=Homo sapiens GN=FLNB PE=1 SV=2	O75369	SwissProt_2012_09.fasta	278159	1	6	6	6	0.000507	0.0307
HN-SMG-Mucus	HN-1	02.RAW (F013047)	40S ribosomal protein S4, X isoform OS=Homo sapiens GN=RPS4X PE=1 SV=2	P62701	SwissProt_2012_09.fasta	29599.3	1	2	2	2	0.000169	0.0989
HN-SMG-Mucus	HN-1	02.RAW (F013047)	Stomatin-like protein 2 OS=Homo sapiens GN=STOML2 PE=1 SV=1	Q9UJZ1	SwissProt_2012_09.fasta	38534.5	0.997	2	2	2	0.000169	0.0871
HN-SMG-Mucus	HN-1	02.RAW (F013047)	Actin, cytoplasmic 2 OS=Homo sapiens GN=ACTG1 PE=1 SV=1	P63261	SwissProt_2012_09.fasta	41793.9	1	5	8	13	0.0011	0.176
HN-SMG-Mucus	HN-1	02.RAW (F013047)	Annexin A11 OS=Homo sapiens GN=ANXA11 PE=1 SV=1	P50995	SwissProt_2012_09.fasta	54391.7	1	3	3	3	0.000254	0.0851
HN-SMG-Mucus	HN-1	02.RAW (F013047)	Galectin-3-binding protein OS=Homo sapiens GN=LGALS3BP PE=1 SV=1	Q08380	SwissProt_2012_09.fasta	65332.1	1	3	3	3	0.000254	0.103
HN-SMG-Mucus	HN-1	02.RAW (F013047)	Nucleolar and coiled-body phosphoprotein 1 OS=Homo sapiens GN=NOLC1 PE=1 SV=2	Q14978	SwissProt_2012_09.fasta	73604.2	0.998	2	2	2	0.000169	0.0358
HN-SMG-Mucus	HN-1	02.RAW (F013047)	Importin subunit beta-1 OS=Homo sapiens GN=KPNB1 PE=1 SV=2	Q14974	SwissProt_2012_09.fasta	97171.3	0.996	2	2	2	0.000169	0.0354
HN-SMG-Mucus	HN-1	02.RAW (F013047)	Keratin, type II cytoskeletal 7 OS=Homo sapiens GN=KRT7 PE=1 SV=5	P08729	SwissProt_2012_09.fasta	51387.3	1	12	14	14	0.00118	0.311
HN-SMG-Mucus	HN-1	02.RAW (F013047)	Sodium/potassium-transporting ATPase subunit beta-1 OS=Homo sapiens GN=ATP1B1 PE=1 SV=1	P05026	SwissProt_2012_09.fasta	35062.9	1	3	3	3	0.000254	0.125
HN-SMG-Mucus	HN-1	02.RAW (F013047)	Sodium/potassium-transporting ATPase subunit alpha-1 OS=Homo sapiens GN=ATP1A1 PE=1 SV=1	P05023	SwissProt_2012_09.fasta	112900	1	7	8	8	0.000676	0.086
HN-SMG-Mucus	HN-1	02.RAW (F013047)	Protein S100-A14 OS=Homo sapiens GN=S100A14 PE=1 SV=1	Q9HCY8	SwissProt_2012_09.fasta	11662.2	0.998	2	2	2	0.000169	0.25
HN-SMG-Mucus	HN-1	02.RAW (F013047)	Deleted in malignant brain tumors 1 protein OS=Homo sapiens GN=DMBT1 PE=1 SV=2	Q9UGM3	SwissProt_2012_09.fasta	260726	1	9	13	34	0.00287	0.068
HN-SMG-Mucus	HN-1	02.RAW (F013047)	Lamin-B1 OS=Homo sapiens GN=LMNB1 PE=1 SV=2	P20700	SwissProt_2012_09.fasta	66409.6	1	3	3	3	0.000254	0.0631
HN-SMG-Mucus	HN-1	02.RAW (F013047)	Ribonuclease inhibitor OS=Homo sapiens GN=RNH1 PE=1 SV=2	P13489	SwissProt_2012_09.fasta	49974.4	0.998	2	2	2	0.000169	0.0477
HN-SMG-Mucus	HN-1	02.RAW (F013047)	Elongation factor 2 OS=Homo sapiens GN=EEF2 PE=1 SV=4	P13639	SwissProt_2012_09.fasta	95340.1	1	6	8	8	0.000676	0.101
HN-SMG-Mucus	HN-1	03.RAW (F013049)	Moesin OS=Homo sapiens GN=MSN PE=1 SV=3	P26038	SwissProt_2012_09.fasta	67821.8	1	3	4	4	0.000337	0.0832
HN-SMG-Mucus	HN-1	03.RAW (F013049)	L-lactate dehydrogenase B chain OS=Homo sapiens GN=LDHB PE=1 SV=2	P07195	SwissProt_2012_09.fasta	36638.6	0.998	2	3	3	0.000253	0.114
HN-SMG-Mucus	HN-1	03.RAW (F013049)	60S acidic ribosomal protein P2 OS=Homo sapiens GN=RPLP2 PE=1 SV=1	P05387	SwissProt_2012_09.fasta	11665.5	0.998	2	3	3	0.000253	0.287
HN-SMG-Mucus	HN-1	03.RAW (F013049)	60S ribosomal protein L17 OS=Homo sapiens GN=RPL17 PE=1 SV=3	P18621	SwissProt_2012_09.fasta	21397.4	0.996	2	2	2	0.000169	0.163
HN-SMG-Mucus	HN-1	03.RAW (F013049)	Myosin regulatory light chain 12B OS=Homo sapiens GN=MYL12B PE=1 SV=2	O14950,P19105	SwissProt_2012_09.fasta	19795.3	0.996	2	2	2	0.000169	0.116
HN-SMG-Mucus	HN-1	03.RAW (F013049)	Fibrinogen gamma chain OS=Homo sapiens GN=FGG PE=1 SV=3	P02679	SwissProt_2012_09.fasta	51513.3	1	5	7	9	0.000759	0.159
HN-SMG-Mucus	HN-1	03.RAW (F013049)	Fibrinogen beta chain OS=Homo sapiens GN=FGB PE=1 SV=2	P02675	SwissProt_2012_09.fasta	55928.6	1	3	3	3	0.000253	0.0855
HN-SMG-Mucus	HN-1	03.RAW (F013049)	Fibrinogen alpha chain OS=Homo sapiens GN=FGA PE=1 SV=2	P02671	SwissProt_2012_09.fasta	94973.4	1	3	3	3	0.000253	0.0531
HN-SMG-Mucus	HN-1	03.RAW (F013049)	Glutamate dehydrogenase 1, mitochondrial OS=Homo sapiens GN=GLUD1 PE=1 SV=2	P00367	SwissProt_2012_09.fasta	61399.7	0.999	2	2	2	0.000169	0.052
HN-SMG-Mucus	HN-1	03.RAW (F013049)	Apolipoprotein A-I OS=Homo sapiens GN=APOA1 PE=1 SV=1	P02647	SwissProt_2012_09.fasta	30778.5	0.998	2	2	2	0.000169	0.0674
HN-SMG-Mucus	HN-1	03.RAW (F013049)	Aldehyde dehydrogenase, dimeric NADP-preferring OS=Homo sapiens GN=ALDH3A1 PE=1 SV=3	P30838	SwissProt_2012_09.fasta	50395.7	0.998	2	2	2	0.000169	0.0618
HN-SMG-Mucus	HN-1	03.RAW (F013049)	Plectin OS=Homo sapiens GN=PLEC PE=1 SV=3	Q15149	SwissProt_2012_09.fasta	531784	1	3	3	3	0.000253	0.0117
HN-SMG-Mucus	HN-1	03.RAW (F013049)	Elongation factor 1-beta OS=Homo sapiens GN=EEF1B2 PE=1 SV=3	P24534	SwissProt_2012_09.fasta	24764.2	1	2	2	2	0.000169	0.222
HN-SMG-Mucus	HN-1	03.RAW (F013049)	Heat shock protein beta-1 OS=Homo sapiens GN=HSPB1 PE=1 SV=2	P04792	SwissProt_2012_09.fasta	22782.6	1	3	5	7	0.00059	0.278
HN-SMG-Mucus	HN-1	03.RAW (F013049)	Cytoplasmic dynein 1 heavy chain 1 OS=Homo sapiens GN=DYNC1H1 PE=1 SV=5	Q14204	SwissProt_2012_09.fasta	532406	0.998	2	2	3	0.000253	0.00581
HN-SMG-Mucus	HN-1	03.RAW (F013049)	Epiplakin OS=Homo sapiens GN=EPPK1 PE=1 SV=2	P58107	SwissProt_2012_09.fasta	555615	0.998	2	2	2	0.000169	0.00806
HN-SMG-Mucus	HN-1	03.RAW (F013049)	Tubulin alpha-1B chain OS=Homo sapiens GN=TUBA1B PE=1 SV=1	P68363	SwissProt_2012_09.fasta	50151.7	1	2	2	2	0.000169	0.0843
HN-SMG-Mucus	HN-1	03.RAW (F013049)	Pyruvate kinase isozymes M1/M2 OS=Homo sapiens GN=PKM PE=1 SV=4	P14618	SwissProt_2012_09.fasta	57937.5	1	3	4	4	0.000337	0.102
HN-SMG-Mucus	HN-1	03.RAW (F013049)	Alpha-actinin-1 OS=Homo sapiens GN=ACTN1 PE=1 SV=2	P12814	SwissProt_2012_09.fasta	103061	0.998	2	2	2	0.000169	0.0527
HN-SMG-Mucus	HN-1	03.RAW (F013049)	Complement C3 OS=Homo sapiens GN=C3 PE=1 SV=2	P01024	SwissProt_2012_09.fasta	187149	1	8	9	9	0.000759	0.0806
HN-SMG-Mucus	HN-1	03.RAW (F013049)	Alpha-2-macroglobulin OS=Homo sapiens GN=A2M PE=1 SV=3	P01023	SwissProt_2012_09.fasta	163290	1	3	3	3	0.000253	0.0278
HN-SMG-Mucus	HN-1	03.RAW (F013049)	Glutathione S-transferase P OS=Homo sapiens GN=GSTP1 PE=1 SV=2	P09211	SwissProt_2012_09.fasta	23356.7	0.998	2	2	2	0.000169	0.143
HN-SMG-Mucus	HN-1	03.RAW (F013049)	Cathepsin G OS=Homo sapiens GN=CTSG PE=1 SV=2	P08311	SwissProt_2012_09.fasta	28837.5	1	3	3	3	0.000253	0.0941
HN-SMG-Mucus	HN-1	03.RAW (F013049)	Voltage-dependent anion-selective channel protein 2 OS=Homo sapiens GN=VDAC2 PE=1 SV=2	P45880	SwissProt_2012_09.fasta	31567.3	1	2	2	2	0.000169	0.116
HN-SMG-Mucus	HN-1	03.RAW (F013049)	Protein disulfide-isomerase A3 OS=Homo sapiens GN=PDIA3 PE=1 SV=4	P30101	SwissProt_2012_09.fasta	56784.6	1	4	5	5	0.000422	0.135
HN-SMG-Mucus	HN-1	03.RAW (F013049)	Tenascin OS=Homo sapiens GN=TNC PE=1 SV=3	P24821	SwissProt_2012_09.fasta	240850	1	3	3	3	0.000253	0.0345
HN-SMG-Mucus	HN-1	03.RAW (F013049)	Vimentin OS=Homo sapiens GN=VIM PE=1 SV=4	P08670	SwissProt_2012_09.fasta	53652.7	1	4	4	4	0.000337	0.073
HN-SMG-Mucus	HN-1	03.RAW (F013049)	IgGFc-binding protein OS=Homo sapiens GN=FCGBP PE=1 SV=3	Q9Y6R7	SwissProt_2012_09.fasta	571983	1	5	5	5	0.000422	0.0192
HN-SMG-Mucus	HN-1	03.RAW (F013049)	Prelamin-A/C OS=Homo sapiens GN=LMNA PE=1 SV=1	P02545	SwissProt_2012_09.fasta	74140.7	0.998	2	2	2	0.000169	0.0271
HN-SMG-Mucus	HN-1	03.RAW (F013049)	40S ribosomal protein S18 OS=Homo sapiens GN=RPS18 PE=1 SV=3	P62269	SwissProt_2012_09.fasta	17719.3	0.998	2	2	2	0.000169	0.112
HN-SMG-Mucus	HN-1	03.RAW (F013049)	DNA-dependent protein kinase catalytic subunit OS=Homo sapiens GN=PRKDC PE=1 SV=3	P78527	SwissProt_2012_09.fasta	469096	0.996	2	2	2	0.000169	0.00921
HN-SMG-Mucus	HN-1	03.RAW (F013049)	Proteasome activator complex subunit 1 OS=Homo sapiens GN=PSME1 PE=1 SV=1	Q06323	SwissProt_2012_09.fasta	28723.9	0.998	2	2	2	0.000169	0.145
HN-SMG-Mucus	HN-1	03.RAW (F013049)	Mucin-5B OS=Homo sapiens GN=MUC5B PE=1 SV=3	Q9HC84	SwissProt_2012_09.fasta	596324	1	16	21	28	0.00236	0.0425
HN-SMG-Mucus	HN-1	03.RAW (F013049)	Epoxide hydrolase 1 OS=Homo sapiens GN=EPHX1 PE=1 SV=1	P07099	SwissProt_2012_09.fasta	52951.1	1	2	2	2	0.000169	0.0462
HN-SMG-Mucus	HN-1	03.RAW (F013049)	Calnexin OS=Homo sapiens GN=CANX PE=1 SV=2	P27824	SwissProt_2012_09.fasta	67570.2	0.999	2	2	2	0.000169	0.0473
HN-SMG-Mucus	HN-1	03.RAW (F013049)	Arachidonate 15-lipoxygenase OS=Homo sapiens GN=ALOX15 PE=1 SV=3	P16050	SwissProt_2012_09.fasta	74805.9	1	4	4	4	0.000337	0.124
HN-SMG-Mucus	HN-1	03.RAW (F013049)	Very long-chain specific acyl-CoA dehydrogenase, mitochondrial OS=Homo sapiens GN=ACADVL PE=1 SV=1	P49748	SwissProt_2012_09.fasta	70391.6	0.998	2	2	2	0.000169	0.0534
HN-SMG-Mucus	HN-1	03.RAW (F013049)	Ceruloplasmin OS=Homo sapiens GN=CP PE=1 SV=1	P00450	SwissProt_2012_09.fasta	122208	1	3	4	5	0.000422	0.0573
HN-SMG-Mucus	HN-1	03.RAW (F013049)	Voltage-dependent anion-selective channel protein 1 OS=Homo sapiens GN=VDAC1 PE=1 SV=2	P21796	SwissProt_2012_09.fasta	30773.9	0.998	2	2	3	0.000253	0.152
HN-SMG-Mucus	HN-1	03.RAW (F013049)	Complement factor B OS=Homo sapiens GN=CFB PE=1 SV=2	P00751	SwissProt_2012_09.fasta	85533.2	1	3	3	3	0.000253	0.0654
HN-SMG-Mucus	HN-1	03.RAW (F013049)	Catenin alpha-1 OS=Homo sapiens GN=CTNNA1 PE=1 SV=1	P35221	SwissProt_2012_09.fasta	100073	1	3	4	5	0.000422	0.0795
HN-SMG-Mucus	HN-1	03.RAW (F013049)	Keratin, type I cytoskeletal 9 OS=Homo sapiens GN=KRT9 PE=1 SV=3	P35527	SwissProt_2012_09.fasta	62065.9	1	9	9	9	0.000759	0.26
HN-SMG-Mucus	HN-1	03.RAW (F013049)	Keratin, type II cytoskeletal 6A OS=Homo sapiens GN=KRT6A PE=1 SV=3	P02538	SwissProt_2012_09.fasta	60046.4	1	8	8	9	0.000759	0.241
HN-SMG-Mucus	HN-1	03.RAW (F013049)	Keratin, type I cytoskeletal 14 OS=Homo sapiens GN=KRT14 PE=1 SV=4	P02533	SwissProt_2012_09.fasta	51562.5	1	4	5	5	0.000422	0.14
HN-SMG-Mucus	HN-1	03.RAW (F013049)	Glycerol-3-phosphate dehydrogenase, mitochondrial OS=Homo sapiens GN=GPD2 PE=1 SV=3	P43304	SwissProt_2012_09.fasta	80854.6	0.998	2	2	2	0.000169	0.0605
HN-SMG-Mucus	HN-1	03.RAW (F013049)	Myoferlin OS=Homo sapiens GN=MYOF PE=1 SV=1	Q9NZM1	SwissProt_2012_09.fasta	234716	0.998	2	2	2	0.000169	0.0204
HN-SMG-Mucus	HN-1	03.RAW (F013049)	Complement factor H OS=Homo sapiens GN=CFH PE=1 SV=4	P08603	SwissProt_2012_09.fasta	139096	1	5	5	5	0.000422	0.0569
HN-SMG-Mucus	HN-1	03.RAW (F013049)	Calpain-1 catalytic subunit OS=Homo sapiens GN=CAPN1 PE=1 SV=1	P07384	SwissProt_2012_09.fasta	81892.6	0.999	2	2	2	0.000169	0.0448
HN-SMG-Mucus	HN-1	03.RAW (F013049)	Heterogeneous nuclear ribonucleoproteins A2/B1 OS=Homo sapiens GN=HNRNPA2B1 PE=1 SV=2	P22626	SwissProt_2012_09.fasta	37430.3	1	4	5	5	0.000422	0.136
HN-SMG-Mucus	HN-1	03.RAW (F013049)	HLA class I histocompatibility antigen, Cw-12 alpha chain OS=Homo sapiens GN=HLA-C PE=1 SV=2	P30508,Q07000	SwissProt_2012_09.fasta	40885.3	0.998	2	2	2	0.000169	0.0956
HN-SMG-Mucus	HN-1	03.RAW (F013049)	Keratin, type II cytoskeletal 5 OS=Homo sapiens GN=KRT5 PE=1 SV=3	P13647	SwissProt_2012_09.fasta	62379.6	1	11	12	14	0.00118	0.19
HN-SMG-Mucus	HN-1	03.RAW (F013049)	Keratin, type I cytoskeletal 13 OS=Homo sapiens GN=KRT13 PE=1 SV=4	P13646	SwissProt_2012_09.fasta	49589.3	1	4	4	4	0.000337	0.122
HN-SMG-Mucus	HN-1	03.RAW (F013049)	Keratin, type I cytoskeletal 10 OS=Homo sapiens GN=KRT10 PE=1 SV=6	P13645	SwissProt_2012_09.fasta	58828.8	1	5	7	7	0.00059	0.142
HN-SMG-Mucus	HN-1	03.RAW (F013049)	Myosin-9 OS=Homo sapiens GN=MYH9 PE=1 SV=4	P35579	SwissProt_2012_09.fasta	226538	1	3	3	4	0.000337	0.0163
HN-SMG-Mucus	HN-1	03.RAW (F013049)	Serum amyloid A-1 protein OS=Homo sapiens GN=SAA1 PE=1 SV=1	P0DJI8	SwissProt_2012_09.fasta	13532.6	0.998	2	2	2	0.000169	0.189
HN-SMG-Mucus	HN-1	03.RAW (F013049)	Annexin A2 OS=Homo sapiens GN=ANXA2 PE=1 SV=2	P07355	SwissProt_2012_09.fasta	38606.1	1	6	6	8	0.000675	0.23
HN-SMG-Mucus	HN-1	03.RAW (F013049)	Keratin, type II cytoskeletal 4 OS=Homo sapiens GN=KRT4 PE=1 SV=4	P19013	SwissProt_2012_09.fasta	57286.1	1	4	4	4	0.000337	0.154
HN-SMG-Mucus	HN-1	03.RAW (F013049)	Keratin, type I cytoskeletal 15 OS=Homo sapiens GN=KRT15 PE=1 SV=3	P19012	SwissProt_2012_09.fasta	49212.9	1	2	2	2	0.000169	0.114
HN-SMG-Mucus	HN-1	03.RAW (F013049)	Clathrin heavy chain 1 OS=Homo sapiens GN=CLTC PE=1 SV=5	Q00610	SwissProt_2012_09.fasta	191619	1	3	4	4	0.000337	0.0334
HN-SMG-Mucus	HN-1	03.RAW (F013049)	Clusterin OS=Homo sapiens GN=CLU PE=1 SV=1	P10909	SwissProt_2012_09.fasta	52495	0.998	2	2	2	0.000169	0.069
HN-SMG-Mucus	HN-1	03.RAW (F013049)	14-3-3 protein sigma OS=Homo sapiens GN=SFN PE=1 SV=1	P31947	SwissProt_2012_09.fasta	27774.8	0.998	2	2	2	0.000169	0.194
HN-SMG-Mucus	HN-1	03.RAW (F013049)	Poly(rC)-binding protein 1 OS=Homo sapiens GN=PCBP1 PE=1 SV=2	Q15365	SwissProt_2012_09.fasta	37498.2	0.998	2	2	2	0.000169	0.0562
HN-SMG-Mucus	HN-1	03.RAW (F013049)	Hypoxia up-regulated protein 1 OS=Homo sapiens GN=HYOU1 PE=1 SV=1	Q9Y4L1	SwissProt_2012_09.fasta	111337	0.999	2	2	2	0.000169	0.037
HN-SMG-Mucus	HN-1	03.RAW (F013049)	Alpha-actinin-4 OS=Homo sapiens GN=ACTN4 PE=1 SV=2	O43707	SwissProt_2012_09.fasta	104857	1	2	2	2	0.000169	0.0395
HN-SMG-Mucus	HN-1	03.RAW (F013049)	Elongation factor 1-alpha 1 OS=Homo sapiens GN=EEF1A1 PE=1 SV=1	P68104,Q5VTE0	SwissProt_2012_09.fasta	50141.2	1	4	6	6	0.000506	0.201
HN-SMG-Mucus	HN-1	03.RAW (F013049)	Complement C4-B OS=Homo sapiens GN=C4B PE=1 SV=1	P0C0L5	SwissProt_2012_09.fasta	192795	0.998	2	2	2	0.000169	0.0166
HN-SMG-Mucus	HN-1	03.RAW (F013049)	Glutathione reductase, mitochondrial OS=Homo sapiens GN=GSR PE=1 SV=2	P00390	SwissProt_2012_09.fasta	56257.4	0.998	2	2	2	0.000169	0.0536
HN-SMG-Mucus	HN-1	03.RAW (F013049)	Trifunctional enzyme subunit alpha, mitochondrial OS=Homo sapiens GN=HADHA PE=1 SV=2	P40939	SwissProt_2012_09.fasta	83001.9	0.998	2	3	3	0.000253	0.0655
HN-SMG-Mucus	HN-1	03.RAW (F013049)	BPI fold-containing family B member 1 OS=Homo sapiens GN=BPIFB1 PE=2 SV=1	Q8TDL5	SwissProt_2012_09.fasta	52443.8	1	6	9	12	0.00101	0.217
HN-SMG-Mucus	HN-1	03.RAW (F013049)	ATP synthase subunit beta, mitochondrial OS=Homo sapiens GN=ATP5B PE=1 SV=3	P06576	SwissProt_2012_09.fasta	56560.6	1	5	6	6	0.000506	0.185
HN-SMG-Mucus	HN-1	03.RAW (F013049)	Calreticulin OS=Homo sapiens GN=CALR PE=1 SV=1	P27797	SwissProt_2012_09.fasta	48142.9	1	3	5	6	0.000506	0.185
HN-SMG-Mucus	HN-1	03.RAW (F013049)	F-actin-capping protein subunit alpha-1 OS=Homo sapiens GN=CAPZA1 PE=1 SV=3	P52907	SwissProt_2012_09.fasta	32923.2	0.998	2	2	2	0.000169	0.133
HN-SMG-Mucus	HN-1	03.RAW (F013049)	Fatty acid synthase OS=Homo sapiens GN=FASN PE=1 SV=3	P49327	SwissProt_2012_09.fasta	273427	1	3	3	3	0.000253	0.0223
HN-SMG-Mucus	HN-1	03.RAW (F013049)	Sarcoplasmic/endoplasmic reticulum calcium ATPase 2 OS=Homo sapiens GN=ATP2A2 PE=1 SV=1	P16615	SwissProt_2012_09.fasta	114759	0.998	2	2	2	0.000169	0.0298
HN-SMG-Mucus	HN-1	03.RAW (F013049)	Protein-glutamine gamma-glutamyltransferase 2 OS=Homo sapiens GN=TGM2 PE=1 SV=2	P21980	SwissProt_2012_09.fasta	77329.1	1	5	5	5	0.000422	0.0873
HN-SMG-Mucus	HN-1	03.RAW (F013049)	Alpha-enolase OS=Homo sapiens GN=ENO1 PE=1 SV=2	P06733	SwissProt_2012_09.fasta	47170.2	0.995	2	2	2	0.000169	0.076
HN-SMG-Mucus	HN-1	03.RAW (F013049)	L-lactate dehydrogenase A chain OS=Homo sapiens GN=LDHA PE=1 SV=2	P00338	SwissProt_2012_09.fasta	36689.2	0.998	2	3	3	0.000253	0.133
HN-SMG-Mucus	HN-1	03.RAW (F013049)	Heterogeneous nuclear ribonucleoprotein M OS=Homo sapiens GN=HNRNPM PE=1 SV=3	P52272	SwissProt_2012_09.fasta	77517.3	1	3	3	3	0.000253	0.0479
HN-SMG-Mucus	HN-1	03.RAW (F013049)	Protein disulfide-isomerase A6 OS=Homo sapiens GN=PDIA6 PE=1 SV=1	Q15084	SwissProt_2012_09.fasta	48122.3	0.998	2	2	2	0.000169	0.0568
HN-SMG-Mucus	HN-1	03.RAW (F013049)	Fibulin-1 OS=Homo sapiens GN=FBLN1 PE=1 SV=4	P23142	SwissProt_2012_09.fasta	77211.6	0.998	2	2	2	0.000169	0.0797
HN-SMG-Mucus	HN-1	03.RAW (F013049)	Ras-related protein Rap-1b OS=Homo sapiens GN=RAP1B PE=1 SV=1	P61224	SwissProt_2012_09.fasta	20824.9	0.998	2	2	2	0.000169	0.0815
HN-SMG-Mucus	HN-1	03.RAW (F013049)	Cytosol aminopeptidase OS=Homo sapiens GN=LAP3 PE=1 SV=3	P28838	SwissProt_2012_09.fasta	56167.8	1	3	3	3	0.000253	0.0713
HN-SMG-Mucus	HN-1	03.RAW (F013049)	40S ribosomal protein S9 OS=Homo sapiens GN=RPS9 PE=1 SV=3	P46781	SwissProt_2012_09.fasta	22592.5	0.998	2	2	2	0.000169	0.124
HN-SMG-Mucus	HN-1	03.RAW (F013049)	Filamin-A OS=Homo sapiens GN=FLNA PE=1 SV=4	P21333	SwissProt_2012_09.fasta	280729	0.998	2	2	2	0.000169	0.0234
HN-SMG-Mucus	HN-1	03.RAW (F013049)	Calpain-2 catalytic subunit OS=Homo sapiens GN=CAPN2 PE=1 SV=6	P17655	SwissProt_2012_09.fasta	79999.1	1	4	4	4	0.000337	0.0871
HN-SMG-Mucus	HN-1	03.RAW (F013049)	Serpin B3 OS=Homo sapiens GN=SERPINB3 PE=1 SV=2	P29508	SwissProt_2012_09.fasta	44565.9	1	4	4	4	0.000337	0.115
HN-SMG-Mucus	HN-1	03.RAW (F013049)	Keratin, type II cytoskeletal 1 OS=Homo sapiens GN=KRT1 PE=1 SV=6	P04264	SwissProt_2012_09.fasta	66040.3	1	5	6	7	0.00059	0.121
HN-SMG-Mucus	HN-1	03.RAW (F013049)	Myosin light polypeptide 6 OS=Homo sapiens GN=MYL6 PE=1 SV=2	P60660	SwissProt_2012_09.fasta	16929.8	0.998	2	2	2	0.000169	0.159
HN-SMG-Mucus	HN-1	03.RAW (F013049)	T-complex protein 1 subunit delta OS=Homo sapiens GN=CCT4 PE=1 SV=4	P50991	SwissProt_2012_09.fasta	57926	0.998	2	2	2	0.000169	0.0519
HN-SMG-Mucus	HN-1	03.RAW (F013049)	Neuroblast differentiation-associated protein AHNAK OS=Homo sapiens GN=AHNAK PE=1 SV=2	Q09666	SwissProt_2012_09.fasta	629104	1	4	4	4	0.000337	0.0151
HN-SMG-Mucus	HN-1	03.RAW (F013049)	Lactotransferrin OS=Homo sapiens GN=LTF PE=1 SV=6	P02788	SwissProt_2012_09.fasta	78182.3	1	12	13	20	0.00169	0.268
HN-SMG-Mucus	HN-1	03.RAW (F013049)	Serotransferrin OS=Homo sapiens GN=TF PE=1 SV=3	P02787	SwissProt_2012_09.fasta	77064.3	1	2	2	2	0.000169	0.0344
HN-SMG-Mucus	HN-1	03.RAW (F013049)	Ig alpha-1 chain C region OS=Homo sapiens GN=IGHA1 PE=1 SV=2	P01876	SwissProt_2012_09.fasta	37653.8	1	4	6	16	0.00135	0.17
HN-SMG-Mucus	HN-1	03.RAW (F013049)	Serum albumin OS=Homo sapiens GN=ALB PE=1 SV=2	P02768	SwissProt_2012_09.fasta	69366.9	1	11	15	57	0.00481	0.223
HN-SMG-Mucus	HN-1	03.RAW (F013049)	Ig gamma-3 chain C region OS=Homo sapiens GN=IGHG3 PE=1 SV=2	P01860	SwissProt_2012_09.fasta	41285.9	0.998	2	2	4	0.000337	0.162
HN-SMG-Mucus	HN-1	03.RAW (F013049)	Ig gamma-1 chain C region OS=Homo sapiens GN=IGHG1 PE=1 SV=1	P01857	SwissProt_2012_09.fasta	36105	1	4	5	7	0.00059	0.215
HN-SMG-Mucus	HN-1	03.RAW (F013049)	Protein disulfide-isomerase OS=Homo sapiens GN=P4HB PE=1 SV=3	P07237	SwissProt_2012_09.fasta	57118.1	0.998	2	3	3	0.000253	0.138
HN-SMG-Mucus	HN-1	03.RAW (F013049)	Ig kappa chain C region OS=Homo sapiens GN=IGKC PE=1 SV=1	P01834	SwissProt_2012_09.fasta	11608.6	1	2	2	2	0.000169	0.472
HN-SMG-Mucus	HN-1	03.RAW (F013049)	Polymeric immunoglobulin receptor OS=Homo sapiens GN=PIGR PE=1 SV=4	P01833	SwissProt_2012_09.fasta	83283.4	1	7	8	13	0.0011	0.141
HN-SMG-Mucus	HN-1	03.RAW (F013049)	Keratin, type II cytoskeletal 8 OS=Homo sapiens GN=KRT8 PE=1 SV=7	P05787	SwissProt_2012_09.fasta	53706.2	0.997	2	3	3	0.000253	0.0807
HN-SMG-Mucus	HN-1	03.RAW (F013049)	Keratin, type I cytoskeletal 18 OS=Homo sapiens GN=KRT18 PE=1 SV=2	P05783	SwissProt_2012_09.fasta	48059	1	3	4	4	0.000337	0.156
HN-SMG-Mucus	HN-1	03.RAW (F013049)	Tubulin beta chain OS=Homo sapiens GN=TUBB PE=1 SV=2	P07437	SwissProt_2012_09.fasta	49670.6	1	3	5	5	0.000422	0.187
HN-SMG-Mucus	HN-1	03.RAW (F013049)	Keratin, type I cytoskeletal 19 OS=Homo sapiens GN=KRT19 PE=1 SV=4	P08727	SwissProt_2012_09.fasta	44107.1	1	7	9	12	0.00101	0.192
HN-SMG-Mucus	HN-1	03.RAW (F013049)	Triosephosphate isomerase OS=Homo sapiens GN=TPI1 PE=1 SV=3	P60174	SwissProt_2012_09.fasta	30790.8	0.999	2	2	2	0.000169	0.143
HN-SMG-Mucus	HN-1	03.RAW (F013049)	Vitamin D-binding protein OS=Homo sapiens GN=GC PE=1 SV=1	P02774	SwissProt_2012_09.fasta	52964.6	0.998	2	2	2	0.000169	0.0591
HN-SMG-Mucus	HN-1	03.RAW (F013049)	Transketolase OS=Homo sapiens GN=TKT PE=1 SV=3	P29401	SwissProt_2012_09.fasta	67879.4	1	3	4	4	0.000337	0.0915
HN-SMG-Mucus	HN-1	03.RAW (F013049)	Desmoplakin OS=Homo sapiens GN=DSP PE=1 SV=3	P15924	SwissProt_2012_09.fasta	331781	1	6	6	6	0.000506	0.0303
HN-SMG-Mucus	HN-1	03.RAW (F013049)	Phosphoglycerate kinase 1 OS=Homo sapiens GN=PGK1 PE=1 SV=3	P00558	SwissProt_2012_09.fasta	44615.3	1	3	3	3	0.000253	0.127
HN-SMG-Mucus	HN-1	03.RAW (F013049)	Filamin-B OS=Homo sapiens GN=FLNB PE=1 SV=2	O75369	SwissProt_2012_09.fasta	278159	1	3	3	3	0.000253	0.0257
HN-SMG-Mucus	HN-1	03.RAW (F013049)	Actin, cytoplasmic 2 OS=Homo sapiens GN=ACTG1 PE=1 SV=1	P63261	SwissProt_2012_09.fasta	41793.9	1	4	5	6	0.000506	0.176
HN-SMG-Mucus	HN-1	03.RAW (F013049)	Deleted in malignant brain tumors 1 protein OS=Homo sapiens GN=DMBT1 PE=1 SV=2	Q9UGM3	SwissProt_2012_09.fasta	260726	1	7	9	9	0.000759	0.0336
HN-SMG-Mucus	HN-1	04.RAW (F013050)	ATP synthase subunit beta, mitochondrial OS=Homo sapiens GN=ATP5B PE=1 SV=3	P06576	SwissProt_2012_09.fasta	56560.6	1	3	5	6	0.000571	0.0926
HN-SMG-Mucus	HN-1	04.RAW (F013050)	Fibrinogen alpha chain OS=Homo sapiens GN=FGA PE=1 SV=2	P02671	SwissProt_2012_09.fasta	94973.4	0.998	2	3	4	0.000381	0.03
HN-SMG-Mucus	HN-1	04.RAW (F013050)	Aspartate aminotransferase, mitochondrial OS=Homo sapiens GN=GOT2 PE=1 SV=3	P00505	SwissProt_2012_09.fasta	47518.6	0.998	2	2	2	0.00019	0.0698
HN-SMG-Mucus	HN-1	04.RAW (F013050)	Actin, cytoplasmic 2 OS=Homo sapiens GN=ACTG1 PE=1 SV=1	P63261	SwissProt_2012_09.fasta	41793.9	1	3	4	4	0.000381	0.125
HN-SMG-Mucus	HN-1	04.RAW (F013050)	Vimentin OS=Homo sapiens GN=VIM PE=1 SV=4	P08670	SwissProt_2012_09.fasta	53652.7	1	3	3	3	0.000286	0.0966
HN-SMG-Mucus	HN-1	04.RAW (F013050)	Keratin, type II cytoskeletal 5 OS=Homo sapiens GN=KRT5 PE=1 SV=3	P13647	SwissProt_2012_09.fasta	62379.6	0.998	2	2	2	0.00019	0.0373
HN-SMG-Mucus	HN-1	04.RAW (F013050)	Glutamate dehydrogenase 1, mitochondrial OS=Homo sapiens GN=GLUD1 PE=1 SV=2	P00367	SwissProt_2012_09.fasta	61399.7	0.998	2	2	2	0.00019	0.0591
HN-SMG-Mucus	HN-1	04.RAW (F013050)	Proteasome subunit alpha type-5 OS=Homo sapiens GN=PSMA5 PE=1 SV=3	P28066	SwissProt_2012_09.fasta	26411.3	0.998	2	2	2	0.00019	0.158
HN-SMG-Mucus	HN-1	04.RAW (F013050)	Beta-2-glycoprotein 1 OS=Homo sapiens GN=APOH PE=1 SV=3	P02749	SwissProt_2012_09.fasta	38298.5	0.998	2	2	2	0.00019	0.11
HN-SMG-Mucus	HN-1	04.RAW (F013050)	Tubulin alpha-1B chain OS=Homo sapiens GN=TUBA1B PE=1 SV=1	P68363	SwissProt_2012_09.fasta	50151.7	0.998	2	3	4	0.000381	0.0887
HN-SMG-Mucus	HN-1	04.RAW (F013050)	Transketolase OS=Homo sapiens GN=TKT PE=1 SV=3	P29401	SwissProt_2012_09.fasta	67879.4	1	3	3	3	0.000286	0.0738
HN-SMG-Mucus	HN-1	04.RAW (F013050)	Myoferlin OS=Homo sapiens GN=MYOF PE=1 SV=1	Q9NZM1	SwissProt_2012_09.fasta	234716	0.998	2	2	2	0.00019	0.0184
HN-SMG-Mucus	HN-1	04.RAW (F013050)	Protein disulfide-isomerase OS=Homo sapiens GN=P4HB PE=1 SV=3	P07237	SwissProt_2012_09.fasta	57118.1	0.998	2	2	2	0.00019	0.0669
HN-SMG-Mucus	HN-1	04.RAW (F013050)	Histone H4 OS=Homo sapiens GN=HIST1H4A PE=1 SV=2	P62805	SwissProt_2012_09.fasta	11367.7	0.998	2	2	2	0.00019	0.214
HN-SMG-Mucus	HN-1	04.RAW (F013050)	Fibrinogen beta chain OS=Homo sapiens GN=FGB PE=1 SV=2	P02675	SwissProt_2012_09.fasta	55928.6	0.999	2	4	4	0.000381	0.0794
HN-SMG-Mucus	HN-1	04.RAW (F013050)	Fibrinogen gamma chain OS=Homo sapiens GN=FGG PE=1 SV=3	P02679	SwissProt_2012_09.fasta	51513.3	0.998	2	3	5	0.000476	0.0684
HN-SMG-Mucus	HN-1	04.RAW (F013050)	Calmodulin OS=Homo sapiens GN=CALM1 PE=1 SV=2	P62158	SwissProt_2012_09.fasta	16838	0.997	2	3	3	0.000286	0.201
HN-SMG-Mucus	HN-1	04.RAW (F013050)	Complement C3 OS=Homo sapiens GN=C3 PE=1 SV=2	P01024	SwissProt_2012_09.fasta	187149	1	3	3	3	0.000286	0.0307
HN-SMG-Mucus	HN-1	04.RAW (F013050)	Mucin-5B OS=Homo sapiens GN=MUC5B PE=1 SV=3	Q9HC84	SwissProt_2012_09.fasta	596324	1	7	9	14	0.00133	0.0229
HN-SMG-Mucus	HN-1	04.RAW (F013050)	Aconitate hydratase, mitochondrial OS=Homo sapiens GN=ACO2 PE=1 SV=2	Q99798	SwissProt_2012_09.fasta	85428	0.998	2	3	3	0.000286	0.0397
HN-SMG-Mucus	HN-1	04.RAW (F013050)	Myosin-9 OS=Homo sapiens GN=MYH9 PE=1 SV=4	P35579	SwissProt_2012_09.fasta	226538	1	3	4	4	0.000381	0.023
HN-SMG-Mucus	HN-1	04.RAW (F013050)	Keratin, type II cytoskeletal 8 OS=Homo sapiens GN=KRT8 PE=1 SV=7	P05787	SwissProt_2012_09.fasta	53706.2	1	3	4	4	0.000381	0.0932
HN-SMG-Mucus	HN-1	04.RAW (F013050)	Serum albumin OS=Homo sapiens GN=ALB PE=1 SV=2	P02768	SwissProt_2012_09.fasta	69366.9	1	3	6	13	0.00124	0.0854
HN-SMG-Mucus	HN-1	04.RAW (F013050)	Ig alpha-1 chain C region OS=Homo sapiens GN=IGHA1 PE=1 SV=2	P01876	SwissProt_2012_09.fasta	37653.8	0.998	2	2	3	0.000286	0.0878
HN-SMG-Mucus	HN-1	04.RAW (F013050)	40S ribosomal protein S20 OS=Homo sapiens GN=RPS20 PE=1 SV=1	P60866	SwissProt_2012_09.fasta	13373	0.998	2	2	2	0.00019	0.193
HN-SMG-Mucus	HN-1	04.RAW (F013050)	Heterogeneous nuclear ribonucleoprotein K OS=Homo sapiens GN=HNRNPK PE=1 SV=1	P61978	SwissProt_2012_09.fasta	50978.5	0.998	2	2	2	0.00019	0.0583
HN-SMG-Mucus	HN-1	04.RAW (F013050)	Ig gamma-1 chain C region OS=Homo sapiens GN=IGHG1 PE=1 SV=1	P01857	SwissProt_2012_09.fasta	36105	0.998	2	2	4	0.000381	0.106
HN-SMG-Mucus	HN-1	04.RAW (F013050)	Keratin, type II cytoskeletal 2 epidermal OS=Homo sapiens GN=KRT2 PE=1 SV=2	P35908	SwissProt_2012_09.fasta	65433.9	0.998	2	2	2	0.00019	0.0908
HN-SMG-Mucus	HN-1	04.RAW (F013050)	Pyruvate kinase isozymes M1/M2 OS=Homo sapiens GN=PKM PE=1 SV=4	P14618	SwissProt_2012_09.fasta	57937.5	0.998	2	2	3	0.000286	0.0772
HN-SMG-Mucus	HN-1	04.RAW (F013050)	Cytoskeleton-associated protein 4 OS=Homo sapiens GN=CKAP4 PE=1 SV=2	Q07065	SwissProt_2012_09.fasta	66022.2	0.998	2	2	2	0.00019	0.0415
HN-SMG-Mucus	HN-1	04.RAW (F013050)	Polymeric immunoglobulin receptor OS=Homo sapiens GN=PIGR PE=1 SV=4	P01833	SwissProt_2012_09.fasta	83283.4	1	4	6	6	0.000571	0.089
HN-SMG-Mucus	HN-1	04.RAW (F013050)	Neutral alpha-glucosidase AB OS=Homo sapiens GN=GANAB PE=1 SV=3	Q14697	SwissProt_2012_09.fasta	106876	1	3	3	3	0.000286	0.0561
HN-SMG-Mucus	HN-1	04.RAW (F013050)	Heat shock protein HSP 90-beta OS=Homo sapiens GN=HSP90AB1 PE=1 SV=4	P08238	SwissProt_2012_09.fasta	83267.3	1	4	5	5	0.000476	0.0787
HN-SMG-Mucus	HN-1	04.RAW (F013050)	Keratin, type I cytoskeletal 19 OS=Homo sapiens GN=KRT19 PE=1 SV=4	P08727	SwissProt_2012_09.fasta	44107.1	1	2	3	3	0.000286	0.075
HN-SMG-Mucus	HN-1	04.RAW (F013050)	Alpha-actinin-4 OS=Homo sapiens GN=ACTN4 PE=1 SV=2	O43707	SwissProt_2012_09.fasta	104857	0.998	2	2	2	0.00019	0.034
HN-SMG-Mucus	HN-1	04.RAW (F013050)	Annexin A2 OS=Homo sapiens GN=ANXA2 PE=1 SV=2	P07355	SwissProt_2012_09.fasta	38606.1	1	4	4	4	0.000381	0.159
HN-SMG-Mucus	HN-1	04.RAW (F013050)	Prelamin-A/C OS=Homo sapiens GN=LMNA PE=1 SV=1	P02545	SwissProt_2012_09.fasta	74140.7	0.998	2	2	2	0.00019	0.0452
HN-SMG-Mucus	HN-1	04.RAW (F013050)	Filamin-B OS=Homo sapiens GN=FLNB PE=1 SV=2	O75369	SwissProt_2012_09.fasta	278159	1	3	3	3	0.000286	0.0184
HN-SMG-Mucus	HN-1	04.RAW (F013050)	Calnexin OS=Homo sapiens GN=CANX PE=1 SV=2	P27824	SwissProt_2012_09.fasta	67570.2	0.998	2	2	2	0.00019	0.0557
HN-SMG-Mucus	HN-1	04.RAW (F013050)	Serpin B3 OS=Homo sapiens GN=SERPINB3 PE=1 SV=2	P29508	SwissProt_2012_09.fasta	44565.9	0.998	2	2	2	0.00019	0.0744
HN-SMG-Mucus	HN-1	04.RAW (F013050)	F-actin-capping protein subunit alpha-1 OS=Homo sapiens GN=CAPZA1 PE=1 SV=3	P52907	SwissProt_2012_09.fasta	32923.2	0.998	2	2	2	0.00019	0.133
HN-SMG-Mucus	HN-1	04.RAW (F013050)	BPI fold-containing family B member 1 OS=Homo sapiens GN=BPIFB1 PE=2 SV=1	Q8TDL5	SwissProt_2012_09.fasta	52443.8	1	3	5	7	0.000666	0.103
HN-SMG-Mucus	HN-1	04.RAW (F013050)	Keratin, type I cytoskeletal 9 OS=Homo sapiens GN=KRT9 PE=1 SV=3	P35527	SwissProt_2012_09.fasta	62065.9	1	2	2	2	0.00019	0.101
HN-SMG-Mucus	HN-1	04.RAW (F013050)	Vitamin D-binding protein OS=Homo sapiens GN=GC PE=1 SV=1	P02774	SwissProt_2012_09.fasta	52964.6	0.998	2	2	2	0.00019	0.0886
HN-SMG-Mucus	HN-1	04.RAW (F013050)	Lactotransferrin OS=Homo sapiens GN=LTF PE=1 SV=6	P02788	SwissProt_2012_09.fasta	78182.3	1	4	4	5	0.000476	0.0915
HN-SMG-Mucus	HN-1	04.RAW (F013050)	Filamin-A OS=Homo sapiens GN=FLNA PE=1 SV=4	P21333	SwissProt_2012_09.fasta	280729	1	3	3	3	0.000286	0.0196
HN-SMG-Mucus	HN-1	05.RAW (F013052)	L-lactate dehydrogenase B chain OS=Homo sapiens GN=LDHB PE=1 SV=2	P07195	SwissProt_2012_09.fasta	36638.6	0.998	2	2	2	0.000167	0.0898
HN-SMG-Mucus	HN-1	05.RAW (F013052)	Fibrinogen gamma chain OS=Homo sapiens GN=FGG PE=1 SV=3	P02679	SwissProt_2012_09.fasta	51513.3	1	8	8	8	0.000669	0.188
HN-SMG-Mucus	HN-1	05.RAW (F013052)	Fibrinogen alpha chain OS=Homo sapiens GN=FGA PE=1 SV=2	P02671	SwissProt_2012_09.fasta	94973.4	1	6	6	6	0.000501	0.0808
HN-SMG-Mucus	HN-1	05.RAW (F013052)	Apolipoprotein A-I OS=Homo sapiens GN=APOA1 PE=1 SV=1	P02647	SwissProt_2012_09.fasta	30778.5	1	7	8	8	0.000669	0.341
HN-SMG-Mucus	HN-1	05.RAW (F013052)	Lumican OS=Homo sapiens GN=LUM PE=1 SV=2	P51884	SwissProt_2012_09.fasta	38431.5	1	3	3	3	0.000251	0.0947
HN-SMG-Mucus	HN-1	05.RAW (F013052)	Plastin-2 OS=Homo sapiens GN=LCP1 PE=1 SV=6	P13796	SwissProt_2012_09.fasta	70291.2	0.998	2	2	2	0.000167	0.0606
HN-SMG-Mucus	HN-1	05.RAW (F013052)	Glyceraldehyde-3-phosphate dehydrogenase OS=Homo sapiens GN=GAPDH PE=1 SV=3	P04406	SwissProt_2012_09.fasta	36053.4	0.998	2	3	3	0.000251	0.101
HN-SMG-Mucus	HN-1	05.RAW (F013052)	ATP synthase subunit beta, mitochondrial OS=Homo sapiens GN=ATP5B PE=1 SV=3	P06576	SwissProt_2012_09.fasta	56560.6	1	4	4	4	0.000334	0.112
HN-SMG-Mucus	HN-1	05.RAW (F013052)	Endoplasmin OS=Homo sapiens GN=HSP90B1 PE=1 SV=1	P14625	SwissProt_2012_09.fasta	92471.7	1	3	3	3	0.000251	0.0535
HN-SMG-Mucus	HN-1	05.RAW (F013052)	Tubulin alpha-1B chain OS=Homo sapiens GN=TUBA1B PE=1 SV=1	P68363	SwissProt_2012_09.fasta	50151.7	1	3	4	6	0.000501	0.0931
HN-SMG-Mucus	HN-1	05.RAW (F013052)	Pyruvate kinase isozymes M1/M2 OS=Homo sapiens GN=PKM PE=1 SV=4	P14618	SwissProt_2012_09.fasta	57937.5	1	5	8	8	0.000669	0.105
HN-SMG-Mucus	HN-1	05.RAW (F013052)	Tubulin beta chain OS=Homo sapiens GN=TUBB PE=1 SV=2	P07437	SwissProt_2012_09.fasta	49670.6	1	3	5	5	0.000418	0.133
HN-SMG-Mucus	HN-1	05.RAW (F013052)	Keratin, type I cytoskeletal 17 OS=Homo sapiens GN=KRT17 PE=1 SV=2	Q04695	SwissProt_2012_09.fasta	48106.7	1	3	4	4	0.000334	0.146
HN-SMG-Mucus	HN-1	05.RAW (F013052)	Complement C3 OS=Homo sapiens GN=C3 PE=1 SV=2	P01024	SwissProt_2012_09.fasta	187149	1	5	6	6	0.000501	0.0397
HN-SMG-Mucus	HN-1	05.RAW (F013052)	Alpha-2-macroglobulin OS=Homo sapiens GN=A2M PE=1 SV=3	P01023	SwissProt_2012_09.fasta	163290	1	3	3	3	0.000251	0.0353
HN-SMG-Mucus	HN-1	05.RAW (F013052)	Zinc-alpha-2-glycoprotein OS=Homo sapiens GN=AZGP1 PE=1 SV=2	P25311	SwissProt_2012_09.fasta	34258.6	1	2	3	3	0.000251	0.0772
HN-SMG-Mucus	HN-1	05.RAW (F013052)	Polypyrimidine tract-binding protein 1 OS=Homo sapiens GN=PTBP1 PE=1 SV=1	P26599	SwissProt_2012_09.fasta	57222.5	0.998	2	2	2	0.000167	0.032
HN-SMG-Mucus	HN-1	05.RAW (F013052)	Alcohol dehydrogenase class 4 mu/sigma chain OS=Homo sapiens GN=ADH7 PE=1 SV=2	P40394	SwissProt_2012_09.fasta	41481.4	0.998	2	2	3	0.000251	0.111
HN-SMG-Mucus	HN-1	05.RAW (F013052)	Elongation factor 1-gamma OS=Homo sapiens GN=EEF1G PE=1 SV=3	P26641	SwissProt_2012_09.fasta	50119.4	1	3	4	5	0.000418	0.087
HN-SMG-Mucus	HN-1	05.RAW (F013052)	Alpha-1-antitrypsin OS=Homo sapiens GN=SERPINA1 PE=1 SV=3	P01009	SwissProt_2012_09.fasta	46737.9	1	4	4	4	0.000334	0.117
HN-SMG-Mucus	HN-1	05.RAW (F013052)	Cytochrome c oxidase subunit 4 isoform 1, mitochondrial OS=Homo sapiens GN=COX4I1 PE=1 SV=1	P13073	SwissProt_2012_09.fasta	19576.8	0.998	2	2	2	0.000167	0.172
HN-SMG-Mucus	HN-1	05.RAW (F013052)	60S ribosomal protein L5 OS=Homo sapiens GN=RPL5 PE=1 SV=3	P46777	SwissProt_2012_09.fasta	34363.5	0.998	2	2	2	0.000167	0.0741
HN-SMG-Mucus	HN-1	05.RAW (F013052)	Protein disulfide-isomerase A3 OS=Homo sapiens GN=PDIA3 PE=1 SV=4	P30101	SwissProt_2012_09.fasta	56784.6	1	3	5	5	0.000418	0.121
HN-SMG-Mucus	HN-1	05.RAW (F013052)	Annexin A1 OS=Homo sapiens GN=ANXA1 PE=1 SV=2	P04083	SwissProt_2012_09.fasta	38715.9	0.998	2	4	4	0.000334	0.0896
HN-SMG-Mucus	HN-1	05.RAW (F013052)	Vimentin OS=Homo sapiens GN=VIM PE=1 SV=4	P08670	SwissProt_2012_09.fasta	53652.7	1	4	6	7	0.000585	0.107
HN-SMG-Mucus	HN-1	05.RAW (F013052)	ATP synthase subunit alpha, mitochondrial OS=Homo sapiens GN=ATP5A1 PE=1 SV=1	P25705	SwissProt_2012_09.fasta	59752.1	1	3	3	3	0.000251	0.0832
HN-SMG-Mucus	HN-1	05.RAW (F013052)	Sulfide:quinone oxidoreductase, mitochondrial OS=Homo sapiens GN=SQRDL PE=1 SV=1	Q9Y6N5	SwissProt_2012_09.fasta	49962	0.998	2	3	3	0.000251	0.08
HN-SMG-Mucus	HN-1	05.RAW (F013052)	Junction plakoglobin OS=Homo sapiens GN=JUP PE=1 SV=3	P14923	SwissProt_2012_09.fasta	81745.9	0.998	2	2	2	0.000167	0.0416
HN-SMG-Mucus	HN-1	05.RAW (F013052)	Prelamin-A/C OS=Homo sapiens GN=LMNA PE=1 SV=1	P02545	SwissProt_2012_09.fasta	74140.7	1	9	10	10	0.000836	0.137
HN-SMG-Mucus	HN-1	05.RAW (F013052)	Profilin-1 OS=Homo sapiens GN=PFN1 PE=1 SV=2	P07737	SwissProt_2012_09.fasta	15054.3	0.998	2	2	2	0.000167	0.143
HN-SMG-Mucus	HN-1	05.RAW (F013052)	Mucin-5B OS=Homo sapiens GN=MUC5B PE=1 SV=3	Q9HC84	SwissProt_2012_09.fasta	596324	1	18	20	23	0.00192	0.0529
HN-SMG-Mucus	HN-1	05.RAW (F013052)	V-type proton ATPase catalytic subunit A OS=Homo sapiens GN=ATP6V1A PE=1 SV=2	P38606	SwissProt_2012_09.fasta	68305.5	1	3	3	3	0.000251	0.0665
HN-SMG-Mucus	HN-1	05.RAW (F013052)	Vacuolar protein sorting-associated protein 35 OS=Homo sapiens GN=VPS35 PE=1 SV=2	Q96QK1	SwissProt_2012_09.fasta	91710	0.998	2	2	2	0.000167	0.0364
HN-SMG-Mucus	HN-1	05.RAW (F013052)	Galectin-3 OS=Homo sapiens GN=LGALS3 PE=1 SV=5	P17931	SwissProt_2012_09.fasta	26152.8	1	3	3	3	0.000251	0.152
HN-SMG-Mucus	HN-1	05.RAW (F013052)	Complement factor B OS=Homo sapiens GN=CFB PE=1 SV=2	P00751	SwissProt_2012_09.fasta	85533.2	1	4	4	4	0.000334	0.0537
HN-SMG-Mucus	HN-1	05.RAW (F013052)	Keratin, type II cytoskeletal 6A OS=Homo sapiens GN=KRT6A PE=1 SV=3	P02538	SwissProt_2012_09.fasta	60046.4	1	4	4	4	0.000334	0.115
HN-SMG-Mucus	HN-1	05.RAW (F013052)	Keratin, type I cytoskeletal 14 OS=Homo sapiens GN=KRT14 PE=1 SV=4	P02533	SwissProt_2012_09.fasta	51562.5	1	3	3	3	0.000251	0.14
HN-SMG-Mucus	HN-1	05.RAW (F013052)	Haptoglobin OS=Homo sapiens GN=HP PE=1 SV=1	P00738	SwissProt_2012_09.fasta	45204.9	1	3	3	3	0.000251	0.069
HN-SMG-Mucus	HN-1	05.RAW (F013052)	Aconitate hydratase, mitochondrial OS=Homo sapiens GN=ACO2 PE=1 SV=2	Q99798	SwissProt_2012_09.fasta	85428	1	4	4	4	0.000334	0.0872
HN-SMG-Mucus	HN-1	05.RAW (F013052)	Aldo-keto reductase family 1 member C1 OS=Homo sapiens GN=AKR1C1 PE=1 SV=1	Q04828	SwissProt_2012_09.fasta	36789.1	1	3	3	4	0.000334	0.164
HN-SMG-Mucus	HN-1	05.RAW (F013052)	Alpha-actinin-4 OS=Homo sapiens GN=ACTN4 PE=1 SV=2	O43707	SwissProt_2012_09.fasta	104857	1	4	4	4	0.000334	0.056
HN-SMG-Mucus	HN-1	05.RAW (F013052)	Protein disulfide-isomerase A4 OS=Homo sapiens GN=PDIA4 PE=1 SV=2	P13667	SwissProt_2012_09.fasta	72934	1	4	4	4	0.000334	0.0605
HN-SMG-Mucus	HN-1	05.RAW (F013052)	Calpain-1 catalytic subunit OS=Homo sapiens GN=CAPN1 PE=1 SV=1	P07384	SwissProt_2012_09.fasta	81892.6	0.998	2	3	3	0.000251	0.042
HN-SMG-Mucus	HN-1	05.RAW (F013052)	Adenosylhomocysteinase OS=Homo sapiens GN=AHCY PE=1 SV=4	P23526	SwissProt_2012_09.fasta	47717.1	0.998	2	2	2	0.000167	0.0532
HN-SMG-Mucus	HN-1	05.RAW (F013052)	10 kDa heat shock protein, mitochondrial OS=Homo sapiens GN=HSPE1 PE=1 SV=2	P61604	SwissProt_2012_09.fasta	10931.8	0.998	2	3	3	0.000251	0.235
HN-SMG-Mucus	HN-1	05.RAW (F013052)	Keratin, type II cytoskeletal 5 OS=Homo sapiens GN=KRT5 PE=1 SV=3	P13647	SwissProt_2012_09.fasta	62379.6	1	7	9	9	0.000752	0.102
HN-SMG-Mucus	HN-1	05.RAW (F013052)	Keratin, type I cytoskeletal 13 OS=Homo sapiens GN=KRT13 PE=1 SV=4	P13646	SwissProt_2012_09.fasta	49589.3	1	3	3	4	0.000334	0.0721
HN-SMG-Mucus	HN-1	05.RAW (F013052)	Keratin, type I cytoskeletal 10 OS=Homo sapiens GN=KRT10 PE=1 SV=6	P13645	SwissProt_2012_09.fasta	58828.8	0.998	2	2	2	0.000167	0.0719
HN-SMG-Mucus	HN-1	05.RAW (F013052)	Heat shock cognate 71 kDa protein OS=Homo sapiens GN=HSPA8 PE=1 SV=1	P11142	SwissProt_2012_09.fasta	70899.8	1	7	9	9	0.000752	0.133
HN-SMG-Mucus	HN-1	05.RAW (F013052)	Phosphatidylethanolamine-binding protein 1 OS=Homo sapiens GN=PEBP1 PE=1 SV=3	P30086	SwissProt_2012_09.fasta	21056.9	0.998	2	2	2	0.000167	0.15
HN-SMG-Mucus	HN-1	05.RAW (F013052)	Myosin-9 OS=Homo sapiens GN=MYH9 PE=1 SV=4	P35579	SwissProt_2012_09.fasta	226538	1	14	15	16	0.00134	0.0954
HN-SMG-Mucus	HN-1	05.RAW (F013052)	Annexin A2 OS=Homo sapiens GN=ANXA2 PE=1 SV=2	P07355	SwissProt_2012_09.fasta	38606.1	1	5	5	7	0.000585	0.189
HN-SMG-Mucus	HN-1	05.RAW (F013052)	Isocitrate dehydrogenase [NADP] cytoplasmic OS=Homo sapiens GN=IDH1 PE=1 SV=2	O75874	SwissProt_2012_09.fasta	46660.5	0.998	2	2	2	0.000167	0.058
HN-SMG-Mucus	HN-1	05.RAW (F013052)	Heterogeneous nuclear ribonucleoprotein K OS=Homo sapiens GN=HNRNPK PE=1 SV=1	P61978	SwissProt_2012_09.fasta	50978.5	0.998	2	2	2	0.000167	0.0626
HN-SMG-Mucus	HN-1	05.RAW (F013052)	Keratin, type II cytoskeletal 4 OS=Homo sapiens GN=KRT4 PE=1 SV=4	P19013	SwissProt_2012_09.fasta	57286.1	1	3	3	3	0.000251	0.0506
HN-SMG-Mucus	HN-1	05.RAW (F013052)	Adenylyl cyclase-associated protein 1 OS=Homo sapiens GN=CAP1 PE=1 SV=5	Q01518	SwissProt_2012_09.fasta	51901.6	0.998	2	2	2	0.000167	0.0442
HN-SMG-Mucus	HN-1	05.RAW (F013052)	Malate dehydrogenase, mitochondrial OS=Homo sapiens GN=MDH2 PE=1 SV=3	P40926	SwissProt_2012_09.fasta	35503.7	0.998	2	2	3	0.000251	0.101
HN-SMG-Mucus	HN-1	05.RAW (F013052)	Clathrin heavy chain 1 OS=Homo sapiens GN=CLTC PE=1 SV=5	Q00610	SwissProt_2012_09.fasta	191619	1	5	5	5	0.000418	0.0388
HN-SMG-Mucus	HN-1	05.RAW (F013052)	Heat shock protein HSP 90-beta OS=Homo sapiens GN=HSP90AB1 PE=1 SV=4	P08238	SwissProt_2012_09.fasta	83267.3	1	4	5	5	0.000418	0.0746
HN-SMG-Mucus	HN-1	05.RAW (F013052)	60S ribosomal protein L12 OS=Homo sapiens GN=RPL12 PE=1 SV=1	P30050	SwissProt_2012_09.fasta	17819.1	0.998	2	2	3	0.000251	0.164
HN-SMG-Mucus	HN-1	05.RAW (F013052)	Clusterin OS=Homo sapiens GN=CLU PE=1 SV=1	P10909	SwissProt_2012_09.fasta	52495	1	2	2	2	0.000167	0.0401
HN-SMG-Mucus	HN-1	05.RAW (F013052)	14-3-3 protein sigma OS=Homo sapiens GN=SFN PE=1 SV=1	P31947	SwissProt_2012_09.fasta	27774.8	1	3	3	3	0.000251	0.194
HN-SMG-Mucus	HN-1	05.RAW (F013052)	Heterogeneous nuclear ribonucleoprotein H OS=Homo sapiens GN=HNRNPH1 PE=1 SV=4	P31943	SwissProt_2012_09.fasta	49229.8	1	3	3	4	0.000334	0.1
HN-SMG-Mucus	HN-1	05.RAW (F013052)	Flavin reductase (NADPH) OS=Homo sapiens GN=BLVRB PE=1 SV=3	P30043	SwissProt_2012_09.fasta	22118.7	0.998	2	2	2	0.000167	0.165
HN-SMG-Mucus	HN-1	05.RAW (F013052)	Keratin, type I cytoskeletal 9 OS=Homo sapiens GN=KRT9 PE=1 SV=3	P35527	SwissProt_2012_09.fasta	62065.9	1	3	4	4	0.000334	0.106
HN-SMG-Mucus	HN-1	05.RAW (F013052)	HLA class II histocompatibility antigen, DR alpha chain OS=Homo sapiens GN=HLA-DRA PE=1 SV=1	P01903	SwissProt_2012_09.fasta	28607.1	1	3	4	4	0.000334	0.118
HN-SMG-Mucus	HN-1	05.RAW (F013052)	Filamin-B OS=Homo sapiens GN=FLNB PE=1 SV=2	O75369	SwissProt_2012_09.fasta	278159	0.998	2	2	2	0.000167	0.0127
HN-SMG-Mucus	HN-1	05.RAW (F013052)	Complement C4-B OS=Homo sapiens GN=C4B PE=1 SV=1	P0C0L5	SwissProt_2012_09.fasta	192795	1	4	4	4	0.000334	0.0264
HN-SMG-Mucus	HN-1	05.RAW (F013052)	NADH-cytochrome b5 reductase 3 OS=Homo sapiens GN=CYB5R3 PE=1 SV=3	P00387	SwissProt_2012_09.fasta	34236.3	1	3	3	3	0.000251	0.206
HN-SMG-Mucus	HN-1	05.RAW (F013052)	Cytochrome c oxidase subunit 5A, mitochondrial OS=Homo sapiens GN=COX5A PE=1 SV=2	P20674	SwissProt_2012_09.fasta	16762.5	0.998	2	2	2	0.000167	0.16
HN-SMG-Mucus	HN-1	05.RAW (F013052)	BPI fold-containing family B member 1 OS=Homo sapiens GN=BPIFB1 PE=2 SV=1	Q8TDL5	SwissProt_2012_09.fasta	52443.8	0.998	2	2	8	0.000669	0.0785
HN-SMG-Mucus	HN-1	05.RAW (F013052)	Elongation factor 2 OS=Homo sapiens GN=EEF2 PE=1 SV=4	P13639	SwissProt_2012_09.fasta	95340.1	1	5	6	6	0.000501	0.0909
HN-SMG-Mucus	HN-1	05.RAW (F013052)	Fatty acid synthase OS=Homo sapiens GN=FASN PE=1 SV=3	P49327	SwissProt_2012_09.fasta	273427	1	3	3	3	0.000251	0.0227
HN-SMG-Mucus	HN-1	05.RAW (F013052)	Retinal dehydrogenase 1 OS=Homo sapiens GN=ALDH1A1 PE=1 SV=2	P00352	SwissProt_2012_09.fasta	54862.8	1	3	3	3	0.000251	0.0938
HN-SMG-Mucus	HN-1	05.RAW (F013052)	T-complex protein 1 subunit zeta OS=Homo sapiens GN=CCT6A PE=1 SV=3	P40227	SwissProt_2012_09.fasta	58025.3	1	3	3	3	0.000251	0.081
HN-SMG-Mucus	HN-1	05.RAW (F013052)	Alpha-enolase OS=Homo sapiens GN=ENO1 PE=1 SV=2	P06733	SwissProt_2012_09.fasta	47170.2	1	3	3	3	0.000251	0.0968
HN-SMG-Mucus	HN-1	05.RAW (F013052)	Calmodulin OS=Homo sapiens GN=CALM1 PE=1 SV=2	P62158	SwissProt_2012_09.fasta	16838	1	3	3	3	0.000251	0.215
HN-SMG-Mucus	HN-1	05.RAW (F013052)	Glutathione S-transferase omega-1 OS=Homo sapiens GN=GSTO1 PE=1 SV=2	P78417	SwissProt_2012_09.fasta	27567.2	0.998	2	2	2	0.000167	0.0788
HN-SMG-Mucus	HN-1	05.RAW (F013052)	Major vault protein OS=Homo sapiens GN=MVP PE=1 SV=4	Q14764	SwissProt_2012_09.fasta	99326	1	4	4	4	0.000334	0.0806
HN-SMG-Mucus	HN-1	05.RAW (F013052)	Serine/threonine-protein phosphatase PP1-gamma catalytic subunit OS=Homo sapiens GN=PPP1CC PE=1 SV=1	P36873,P62136,P62140	SwissProt_2012_09.fasta	37513.9	1	3	4	4	0.000334	0.102
HN-SMG-Mucus	HN-1	05.RAW (F013052)	Fibrinogen beta chain OS=Homo sapiens GN=FGB PE=1 SV=2	P02675	SwissProt_2012_09.fasta	55928.6	1	3	3	3	0.000251	0.112
HN-SMG-Mucus	HN-1	05.RAW (F013052)	Plectin OS=Homo sapiens GN=PLEC PE=1 SV=3	Q15149	SwissProt_2012_09.fasta	531784	1	6	6	6	0.000501	0.0145
HN-SMG-Mucus	HN-1	05.RAW (F013052)	Histone H4 OS=Homo sapiens GN=HIST1H4A PE=1 SV=2	P62805	SwissProt_2012_09.fasta	11367.7	1	3	4	6	0.000501	0.34
HN-SMG-Mucus	HN-1	05.RAW (F013052)	Serpin B3 OS=Homo sapiens GN=SERPINB3 PE=1 SV=2	P29508	SwissProt_2012_09.fasta	44565.9	1	3	3	3	0.000251	0.0564
HN-SMG-Mucus	HN-1	05.RAW (F013052)	40S ribosomal protein SA OS=Homo sapiens GN=RPSA PE=1 SV=4	P08865	SwissProt_2012_09.fasta	32854.1	0.998	2	2	2	0.000167	0.0915
HN-SMG-Mucus	HN-1	05.RAW (F013052)	Interleukin enhancer-binding factor 3 OS=Homo sapiens GN=ILF3 PE=1 SV=3	Q12906	SwissProt_2012_09.fasta	95338.9	0.998	2	2	2	0.000167	0.028
HN-SMG-Mucus	HN-1	05.RAW (F013052)	Keratin, type II cytoskeletal 1 OS=Homo sapiens GN=KRT1 PE=1 SV=6	P04264	SwissProt_2012_09.fasta	66040.3	1	4	4	4	0.000334	0.0854
HN-SMG-Mucus	HN-1	05.RAW (F013052)	Catenin delta-1 OS=Homo sapiens GN=CTNND1 PE=1 SV=1	O60716	SwissProt_2012_09.fasta	108172	0.998	2	2	2	0.000167	0.032
HN-SMG-Mucus	HN-1	05.RAW (F013052)	Transforming protein RhoA OS=Homo sapiens GN=RHOA PE=1 SV=1	P61586	SwissProt_2012_09.fasta	21768.4	0.998	2	3	3	0.000251	0.0777
HN-SMG-Mucus	HN-1	05.RAW (F013052)	Isocitrate dehydrogenase [NADP], mitochondrial OS=Homo sapiens GN=IDH2 PE=1 SV=2	P48735	SwissProt_2012_09.fasta	50910.4	1	3	3	3	0.000251	0.0774
HN-SMG-Mucus	HN-1	05.RAW (F013052)	Hemoglobin subunit beta OS=Homo sapiens GN=HBB PE=1 SV=2	P68871	SwissProt_2012_09.fasta	15998	0.998	2	2	3	0.000251	0.19
HN-SMG-Mucus	HN-1	05.RAW (F013052)	Chromobox protein homolog 3 OS=Homo sapiens GN=CBX3 PE=1 SV=4	Q13185	SwissProt_2012_09.fasta	20812	0.997	2	2	2	0.000167	0.148
HN-SMG-Mucus	HN-1	05.RAW (F013052)	Trans-2,3-enoyl-CoA reductase OS=Homo sapiens GN=TECR PE=1 SV=1	Q9NZ01	SwissProt_2012_09.fasta	36036	0.998	2	2	2	0.000167	0.0649
HN-SMG-Mucus	HN-1	05.RAW (F013052)	Heat shock protein HSP 90-alpha OS=Homo sapiens GN=HSP90AA1 PE=1 SV=5	P07900	SwissProt_2012_09.fasta	84663.2	1	3	3	4	0.000334	0.128
HN-SMG-Mucus	HN-1	05.RAW (F013052)	Arachidonate 15-lipoxygenase OS=Homo sapiens GN=ALOX15 PE=1 SV=3	P16050	SwissProt_2012_09.fasta	74805.9	1	4	4	4	0.000334	0.0846
HN-SMG-Mucus	HN-1	05.RAW (F013052)	6-phosphogluconate dehydrogenase, decarboxylating OS=Homo sapiens GN=PGD PE=1 SV=3	P52209	SwissProt_2012_09.fasta	53141.9	0.999	2	2	2	0.000167	0.06
HN-SMG-Mucus	HN-1	05.RAW (F013052)	Lactotransferrin OS=Homo sapiens GN=LTF PE=1 SV=6	P02788	SwissProt_2012_09.fasta	78182.3	1	15	16	19	0.00159	0.293
HN-SMG-Mucus	HN-1	05.RAW (F013052)	Serotransferrin OS=Homo sapiens GN=TF PE=1 SV=3	P02787	SwissProt_2012_09.fasta	77064.3	1	6	6	6	0.000501	0.103
HN-SMG-Mucus	HN-1	05.RAW (F013052)	Serum albumin OS=Homo sapiens GN=ALB PE=1 SV=2	P02768	SwissProt_2012_09.fasta	69366.9	1	19	24	39	0.00326	0.309
HN-SMG-Mucus	HN-1	05.RAW (F013052)	Alpha-1-acid glycoprotein 1 OS=Homo sapiens GN=ORM1 PE=1 SV=1	P02763	SwissProt_2012_09.fasta	23512.1	0.998	2	2	2	0.000167	0.114
HN-SMG-Mucus	HN-1	05.RAW (F013052)	Nucleosome assembly protein 1-like 1 OS=Homo sapiens GN=NAP1L1 PE=1 SV=1	P55209	SwissProt_2012_09.fasta	45375	0.998	2	2	2	0.000167	0.0563
HN-SMG-Mucus	HN-1	05.RAW (F013052)	Interferon-induced guanylate-binding protein 1 OS=Homo sapiens GN=GBP1 PE=1 SV=2	P32455,Q9H0R5	SwissProt_2012_09.fasta	68115.7	0.998	2	2	2	0.000167	0.0372
HN-SMG-Mucus	HN-1	05.RAW (F013052)	Ig gamma-1 chain C region OS=Homo sapiens GN=IGHG1 PE=1 SV=1	P01857	SwissProt_2012_09.fasta	36105	0.998	2	3	9	0.000752	0.121
HN-SMG-Mucus	HN-1	05.RAW (F013052)	Ezrin OS=Homo sapiens GN=EZR PE=1 SV=4	P15311	SwissProt_2012_09.fasta	69414.7	0.998	2	2	2	0.000167	0.0529
HN-SMG-Mucus	HN-1	05.RAW (F013052)	Protein disulfide-isomerase OS=Homo sapiens GN=P4HB PE=1 SV=3	P07237	SwissProt_2012_09.fasta	57118.1	1	4	4	4	0.000334	0.0886
HN-SMG-Mucus	HN-1	05.RAW (F013052)	Heat shock 70 kDa protein 1A/1B OS=Homo sapiens GN=HSPA1A PE=1 SV=5	P08107	SwissProt_2012_09.fasta	70054	0.999	2	2	2	0.000167	0.0468
HN-SMG-Mucus	HN-1	05.RAW (F013052)	Alpha-1-antichymotrypsin OS=Homo sapiens GN=SERPINA3 PE=1 SV=2	P01011	SwissProt_2012_09.fasta	47653	1	4	7	7	0.000585	0.0757
HN-SMG-Mucus	HN-1	05.RAW (F013052)	Histone H2A type 1 OS=Homo sapiens GN=HIST1H2AG PE=1 SV=2	P0C0S8,Q16777,Q6FI13,Q96KK5,Q99878,Q9BTM1	SwissProt_2012_09.fasta	14020	0.998	2	2	2	0.000167	0.108
HN-SMG-Mucus	HN-1	05.RAW (F013052)	T-complex protein 1 subunit beta OS=Homo sapiens GN=CCT2 PE=1 SV=4	P78371	SwissProt_2012_09.fasta	57489.9	0.998	2	2	2	0.000167	0.043
HN-SMG-Mucus	HN-1	05.RAW (F013052)	Keratin, type II cytoskeletal 8 OS=Homo sapiens GN=KRT8 PE=1 SV=7	P05787	SwissProt_2012_09.fasta	53706.2	1	5	7	8	0.000669	0.141
HN-SMG-Mucus	HN-1	05.RAW (F013052)	Keratin, type I cytoskeletal 18 OS=Homo sapiens GN=KRT18 PE=1 SV=2	P05783	SwissProt_2012_09.fasta	48059	1	7	8	8	0.000669	0.184
HN-SMG-Mucus	HN-1	05.RAW (F013052)	Protein S100-A8 OS=Homo sapiens GN=S100A8 PE=1 SV=1	P05109	SwissProt_2012_09.fasta	10835	1	3	4	4	0.000334	0.333
HN-SMG-Mucus	HN-1	05.RAW (F013052)	Antileukoproteinase OS=Homo sapiens GN=SLPI PE=1 SV=2	P03973	SwissProt_2012_09.fasta	14326	0.998	2	2	2	0.000167	0.174
HN-SMG-Mucus	HN-1	05.RAW (F013052)	IgGFc-binding protein OS=Homo sapiens GN=FCGBP PE=1 SV=3	Q9Y6R7	SwissProt_2012_09.fasta	571983	1	4	4	5	0.000418	0.0104
HN-SMG-Mucus	HN-1	05.RAW (F013052)	Elongation factor 1-alpha 1 OS=Homo sapiens GN=EEF1A1 PE=1 SV=1	P68104,Q5VTE0	SwissProt_2012_09.fasta	50141.2	0.998	2	3	10	0.000836	0.0931
HN-SMG-Mucus	HN-1	05.RAW (F013052)	Heterogeneous nuclear ribonucleoproteins C1/C2 OS=Homo sapiens GN=HNRNPC PE=1 SV=4	P07910	SwissProt_2012_09.fasta	33670.5	1	3	3	3	0.000251	0.0686
HN-SMG-Mucus	HN-1	05.RAW (F013052)	Keratin, type I cytoskeletal 19 OS=Homo sapiens GN=KRT19 PE=1 SV=4	P08727	SwissProt_2012_09.fasta	44107.1	1	7	9	11	0.000919	0.185
HN-SMG-Mucus	HN-1	05.RAW (F013052)	Neutral alpha-glucosidase AB OS=Homo sapiens GN=GANAB PE=1 SV=3	Q14697	SwissProt_2012_09.fasta	106876	0.997	2	2	2	0.000167	0.0265
HN-SMG-Mucus	HN-1	05.RAW (F013052)	78 kDa glucose-regulated protein OS=Homo sapiens GN=HSPA5 PE=1 SV=2	P11021	SwissProt_2012_09.fasta	72334.7	1	7	9	10	0.000836	0.133
HN-SMG-Mucus	HN-1	05.RAW (F013052)	Dolichyl-diphosphooligosaccharide--protein glycosyltransferase subunit 1 OS=Homo sapiens GN=RPN1 PE=1 SV=1	P04843	SwissProt_2012_09.fasta	68571	1	4	4	4	0.000334	0.122
HN-SMG-Mucus	HN-1	05.RAW (F013052)	Actin-related protein 2 OS=Homo sapiens GN=ACTR2 PE=1 SV=1	P61160	SwissProt_2012_09.fasta	44761.7	0.998	2	3	3	0.000251	0.066
HN-SMG-Mucus	HN-1	05.RAW (F013052)	Ig alpha-1 chain C region OS=Homo sapiens GN=IGHA1 PE=1 SV=2	P01876	SwissProt_2012_09.fasta	37653.8	0.998	2	6	9	0.000752	0.122
HN-SMG-Mucus	HN-1	05.RAW (F013052)	Beta-2-microglobulin OS=Homo sapiens GN=B2M PE=1 SV=1	P61769	SwissProt_2012_09.fasta	13714.9	0.998	2	2	2	0.000167	0.168
HN-SMG-Mucus	HN-1	05.RAW (F013052)	Vitamin D-binding protein OS=Homo sapiens GN=GC PE=1 SV=1	P02774	SwissProt_2012_09.fasta	52964.6	0.998	2	2	2	0.000167	0.0781
HN-SMG-Mucus	HN-1	05.RAW (F013052)	Ornithine aminotransferase, mitochondrial OS=Homo sapiens GN=OAT PE=1 SV=1	P04181	SwissProt_2012_09.fasta	48536.2	0.998	2	2	2	0.000167	0.0661
HN-SMG-Mucus	HN-1	05.RAW (F013052)	Transketolase OS=Homo sapiens GN=TKT PE=1 SV=3	P29401	SwissProt_2012_09.fasta	67879.4	0.998	2	2	2	0.000167	0.061
HN-SMG-Mucus	HN-1	05.RAW (F013052)	Annexin A5 OS=Homo sapiens GN=ANXA5 PE=1 SV=2	P08758	SwissProt_2012_09.fasta	35938.6	0.998	2	2	2	0.000167	0.0594
HN-SMG-Mucus	HN-1	05.RAW (F013052)	Cathepsin B OS=Homo sapiens GN=CTSB PE=1 SV=3	P07858	SwissProt_2012_09.fasta	37821.2	0.998	2	3	4	0.000334	0.103
HN-SMG-Mucus	HN-1	05.RAW (F013052)	Heterogeneous nuclear ribonucleoprotein A1 OS=Homo sapiens GN=HNRNPA1 PE=1 SV=5	P09651	SwissProt_2012_09.fasta	38747	0.998	2	2	2	0.000167	0.078
HN-SMG-Mucus	HN-1	05.RAW (F013052)	Phosphoglycerate kinase 1 OS=Homo sapiens GN=PGK1 PE=1 SV=3	P00558	SwissProt_2012_09.fasta	44615.3	0.998	2	2	2	0.000167	0.0743
HN-SMG-Mucus	HN-1	05.RAW (F013052)	Actin, cytoplasmic 2 OS=Homo sapiens GN=ACTG1 PE=1 SV=1	P63261	SwissProt_2012_09.fasta	41793.9	1	4	6	6	0.000501	0.203
HN-SMG-Mucus	HN-1	05.RAW (F013052)	Keratin, type II cytoskeletal 7 OS=Homo sapiens GN=KRT7 PE=1 SV=5	P08729	SwissProt_2012_09.fasta	51387.3	1	3	3	4	0.000334	0.0832
HN-SMG-Mucus	HN-1	05.RAW (F013052)	Sodium/potassium-transporting ATPase subunit alpha-1 OS=Homo sapiens GN=ATP1A1 PE=1 SV=1	P05023	SwissProt_2012_09.fasta	112900	1	3	3	3	0.000251	0.0313
HN-SMG-Mucus	HN-2	06.RAW (F013053)	BPI fold-containing family B member 1 OS=Homo sapiens GN=BPIFB1 PE=2 SV=1	Q8TDL5	SwissProt_2012_09.fasta	52443.8	1	5	5	6	0.000516	0.112
HN-SMG-Mucus	HN-2	07.RAW (F013055)	Aspartate aminotransferase, mitochondrial OS=Homo sapiens GN=GOT2 PE=1 SV=3	P00505	SwissProt_2012_09.fasta	47518.6	0.998	2	2	2	0.000168	0.0698
HN-SMG-Mucus	HN-2	07.RAW (F013055)	Transgelin-2 OS=Homo sapiens GN=TAGLN2 PE=1 SV=3	P37802	SwissProt_2012_09.fasta	22391.9	1	3	3	3	0.000251	0.251
HN-SMG-Mucus	HN-2	07.RAW (F013055)	40S ribosomal protein S6 OS=Homo sapiens GN=RPS6 PE=1 SV=1	P62753	SwissProt_2012_09.fasta	28681.7	1	3	3	3	0.000251	0.141
HN-SMG-Mucus	HN-2	07.RAW (F013055)	60S acidic ribosomal protein P0 OS=Homo sapiens GN=RPLP0 PE=1 SV=1	P05388	SwissProt_2012_09.fasta	34274.3	0.998	2	2	2	0.000168	0.0694
HN-SMG-Mucus	HN-2	07.RAW (F013055)	60S acidic ribosomal protein P1 OS=Homo sapiens GN=RPLP1 PE=1 SV=1	P05386	SwissProt_2012_09.fasta	11514.1	0.998	2	2	2	0.000168	0.518
HN-SMG-Mucus	HN-2	07.RAW (F013055)	60S ribosomal protein L7 OS=Homo sapiens GN=RPL7 PE=1 SV=1	P18124	SwissProt_2012_09.fasta	29227.7	1	3	3	3	0.000251	0.145
HN-SMG-Mucus	HN-2	07.RAW (F013055)	Cytoplasmic dynein 1 heavy chain 1 OS=Homo sapiens GN=DYNC1H1 PE=1 SV=5	Q14204	SwissProt_2012_09.fasta	532406	1	4	4	4	0.000335	0.0131
HN-SMG-Mucus	HN-2	07.RAW (F013055)	Fibrinogen alpha chain OS=Homo sapiens GN=FGA PE=1 SV=2	P02671	SwissProt_2012_09.fasta	94973.4	1	2	2	2	0.000168	0.0346
HN-SMG-Mucus	HN-2	07.RAW (F013055)	Peroxiredoxin-1 OS=Homo sapiens GN=PRDX1 PE=1 SV=1	Q06830	SwissProt_2012_09.fasta	22110.9	0.999	2	2	2	0.000168	0.0754
HN-SMG-Mucus	HN-2	07.RAW (F013055)	Alpha-2-macroglobulin OS=Homo sapiens GN=A2M PE=1 SV=3	P01023	SwissProt_2012_09.fasta	163290	1	3	3	3	0.000251	0.0217
HN-SMG-Mucus	HN-2	07.RAW (F013055)	Complement C3 OS=Homo sapiens GN=C3 PE=1 SV=2	P01024	SwissProt_2012_09.fasta	187149	1	9	11	11	0.000921	0.0824
HN-SMG-Mucus	HN-2	07.RAW (F013055)	Proteasome subunit alpha type-7 OS=Homo sapiens GN=PSMA7 PE=1 SV=1	O14818	SwissProt_2012_09.fasta	27887.2	1	3	3	4	0.000335	0.161
HN-SMG-Mucus	HN-2	07.RAW (F013055)	Mucin-5AC (Fragments) OS=Homo sapiens GN=MUC5AC PE=1 SV=3	P98088	SwissProt_2012_09.fasta	526585	1	10	10	10	0.000838	0.0352
HN-SMG-Mucus	HN-2	07.RAW (F013055)	Splicing factor, proline- and glutamine-rich OS=Homo sapiens GN=SFPQ PE=1 SV=2	P23246	SwissProt_2012_09.fasta	76149.5	0.998	2	2	2	0.000168	0.0438
HN-SMG-Mucus	HN-2	07.RAW (F013055)	Protein disulfide-isomerase A6 OS=Homo sapiens GN=PDIA6 PE=1 SV=1	Q15084	SwissProt_2012_09.fasta	48122.3	1	3	3	3	0.000251	0.12
HN-SMG-Mucus	HN-2	07.RAW (F013055)	Apolipoprotein A-II OS=Homo sapiens GN=APOA2 PE=1 SV=1	P02652	SwissProt_2012_09.fasta	11175.3	0.998	2	2	2	0.000168	0.19
HN-SMG-Mucus	HN-2	07.RAW (F013055)	T-complex protein 1 subunit theta OS=Homo sapiens GN=CCT8 PE=1 SV=4	P50990	SwissProt_2012_09.fasta	59621	0.998	2	2	2	0.000168	0.0383
HN-SMG-Mucus	HN-2	07.RAW (F013055)	Lumican OS=Homo sapiens GN=LUM PE=1 SV=2	P51884	SwissProt_2012_09.fasta	38431.5	0.998	2	2	2	0.000168	0.0828
HN-SMG-Mucus	HN-2	07.RAW (F013055)	Aldehyde dehydrogenase, dimeric NADP-preferring OS=Homo sapiens GN=ALDH3A1 PE=1 SV=3	P30838	SwissProt_2012_09.fasta	50395.7	1	6	7	7	0.000586	0.236
HN-SMG-Mucus	HN-2	07.RAW (F013055)	Eukaryotic initiation factor 4A-I OS=Homo sapiens GN=EIF4A1 PE=1 SV=1	P60842	SwissProt_2012_09.fasta	46155.3	1	2	2	2	0.000168	0.0591
HN-SMG-Mucus	HN-2	07.RAW (F013055)	Peroxiredoxin-2 OS=Homo sapiens GN=PRDX2 PE=1 SV=5	P32119	SwissProt_2012_09.fasta	21892.4	1	2	2	2	0.000168	0.131
HN-SMG-Mucus	HN-2	07.RAW (F013055)	Glyceraldehyde-3-phosphate dehydrogenase OS=Homo sapiens GN=GAPDH PE=1 SV=3	P04406	SwissProt_2012_09.fasta	36053.4	1	3	4	5	0.000419	0.128
HN-SMG-Mucus	HN-2	07.RAW (F013055)	Pulmonary surfactant-associated protein A2 OS=Homo sapiens GN=SFTPA2 PE=1 SV=1	Q8IWL1,Q8IWL2	SwissProt_2012_09.fasta	26182.3	0.998	2	2	4	0.000335	0.133
HN-SMG-Mucus	HN-2	07.RAW (F013055)	60S ribosomal protein L18 OS=Homo sapiens GN=RPL18 PE=1 SV=2	Q07020	SwissProt_2012_09.fasta	21635.2	0.999	2	2	3	0.000251	0.128
HN-SMG-Mucus	HN-2	07.RAW (F013055)	Tubulin beta-4B chain OS=Homo sapiens GN=TUBB4B PE=1 SV=1	P68371	SwissProt_2012_09.fasta	49830.7	1	3	4	4	0.000335	0.164
HN-SMG-Mucus	HN-2	07.RAW (F013055)	Endoplasmin OS=Homo sapiens GN=HSP90B1 PE=1 SV=1	P14625	SwissProt_2012_09.fasta	92471.7	1	5	5	5	0.000419	0.0996
HN-SMG-Mucus	HN-2	07.RAW (F013055)	Triosephosphate isomerase OS=Homo sapiens GN=TPI1 PE=1 SV=3	P60174	SwissProt_2012_09.fasta	30790.8	1	3	4	6	0.000503	0.178
HN-SMG-Mucus	HN-2	07.RAW (F013055)	Tubulin alpha-1B chain OS=Homo sapiens GN=TUBA1B PE=1 SV=1	P68363	SwissProt_2012_09.fasta	50151.7	1	5	5	8	0.00067	0.18
HN-SMG-Mucus	HN-2	07.RAW (F013055)	Pyruvate kinase isozymes M1/M2 OS=Homo sapiens GN=PKM PE=1 SV=4	P14618	SwissProt_2012_09.fasta	57937.5	1	7	7	7	0.000586	0.19
HN-SMG-Mucus	HN-2	07.RAW (F013055)	Proteasome subunit alpha type-3 OS=Homo sapiens GN=PSMA3 PE=1 SV=2	P25788	SwissProt_2012_09.fasta	28433.7	0.998	2	2	2	0.000168	0.0863
HN-SMG-Mucus	HN-2	07.RAW (F013055)	NADH-cytochrome b5 reductase 3 OS=Homo sapiens GN=CYB5R3 PE=1 SV=3	P00387	SwissProt_2012_09.fasta	34236.3	0.995	2	2	2	0.000168	0.0997
HN-SMG-Mucus	HN-2	07.RAW (F013055)	Histone H1.5 OS=Homo sapiens GN=HIST1H1B PE=1 SV=3	P16401	SwissProt_2012_09.fasta	22581.7	0.998	2	3	3	0.000251	0.102
HN-SMG-Mucus	HN-2	07.RAW (F013055)	Lactoperoxidase OS=Homo sapiens GN=LPO PE=1 SV=2	P22079	SwissProt_2012_09.fasta	80290.9	1	3	3	3	0.000251	0.0744
HN-SMG-Mucus	HN-2	07.RAW (F013055)	Cofilin-1 OS=Homo sapiens GN=CFL1 PE=1 SV=3	P23528	SwissProt_2012_09.fasta	18503.2	0.998	2	2	2	0.000168	0.205
HN-SMG-Mucus	HN-2	07.RAW (F013055)	ATP synthase subunit d, mitochondrial OS=Homo sapiens GN=ATP5H PE=1 SV=3	O75947	SwissProt_2012_09.fasta	18491.9	0.998	2	2	2	0.000168	0.236
HN-SMG-Mucus	HN-2	07.RAW (F013055)	Keratin, type I cytoskeletal 17 OS=Homo sapiens GN=KRT17 PE=1 SV=2	Q04695	SwissProt_2012_09.fasta	48106.7	1	6	8	8	0.00067	0.227
HN-SMG-Mucus	HN-2	07.RAW (F013055)	Elongation factor 1-alpha 1 OS=Homo sapiens GN=EEF1A1 PE=1 SV=1	P68104,Q5VTE0	SwissProt_2012_09.fasta	50141.2	1	3	3	3	0.000251	0.0606
HN-SMG-Mucus	HN-2	07.RAW (F013055)	Glutathione S-transferase P OS=Homo sapiens GN=GSTP1 PE=1 SV=2	P09211	SwissProt_2012_09.fasta	23356.7	1	8	9	11	0.000921	0.481
HN-SMG-Mucus	HN-2	07.RAW (F013055)	Zinc-alpha-2-glycoprotein OS=Homo sapiens GN=AZGP1 PE=1 SV=2	P25311	SwissProt_2012_09.fasta	34258.6	1	5	5	5	0.000419	0.191
HN-SMG-Mucus	HN-2	07.RAW (F013055)	Peptidyl-prolyl cis-trans isomerase A OS=Homo sapiens GN=PPIA PE=1 SV=2	P62937	SwissProt_2012_09.fasta	18012.9	1	3	3	3	0.000251	0.218
HN-SMG-Mucus	HN-2	07.RAW (F013055)	BPI fold-containing family B member 2 OS=Homo sapiens GN=BPIFB2 PE=1 SV=2	Q8N4F0	SwissProt_2012_09.fasta	49172.9	0.998	2	2	2	0.000168	0.0677
HN-SMG-Mucus	HN-2	07.RAW (F013055)	Alcohol dehydrogenase class 4 mu/sigma chain OS=Homo sapiens GN=ADH7 PE=1 SV=2	P40394	SwissProt_2012_09.fasta	41481.4	1	4	4	5	0.000419	0.137
HN-SMG-Mucus	HN-2	07.RAW (F013055)	Alpha-1-antitrypsin OS=Homo sapiens GN=SERPINA1 PE=1 SV=3	P01009	SwissProt_2012_09.fasta	46737.9	1	3	4	5	0.000419	0.124
HN-SMG-Mucus	HN-2	07.RAW (F013055)	60S ribosomal protein L6 OS=Homo sapiens GN=RPL6 PE=1 SV=3	Q02878	SwissProt_2012_09.fasta	32729.3	0.998	2	2	2	0.000168	0.0903
HN-SMG-Mucus	HN-2	07.RAW (F013055)	60S ribosomal protein L27a OS=Homo sapiens GN=RPL27A PE=1 SV=2	P46776	SwissProt_2012_09.fasta	16561.4	0.998	2	2	2	0.000168	0.155
HN-SMG-Mucus	HN-2	07.RAW (F013055)	Protein disulfide-isomerase A3 OS=Homo sapiens GN=PDIA3 PE=1 SV=4	P30101	SwissProt_2012_09.fasta	56784.6	1	6	6	6	0.000503	0.141
HN-SMG-Mucus	HN-2	07.RAW (F013055)	Annexin A1 OS=Homo sapiens GN=ANXA1 PE=1 SV=2	P04083	SwissProt_2012_09.fasta	38715.9	1	6	6	7	0.000586	0.211
HN-SMG-Mucus	HN-2	07.RAW (F013055)	Vimentin OS=Homo sapiens GN=VIM PE=1 SV=4	P08670	SwissProt_2012_09.fasta	53652.7	1	5	5	5	0.000419	0.127
HN-SMG-Mucus	HN-2	07.RAW (F013055)	ATP synthase subunit alpha, mitochondrial OS=Homo sapiens GN=ATP5A1 PE=1 SV=1	P25705	SwissProt_2012_09.fasta	59752.1	1	3	3	3	0.000251	0.0561
HN-SMG-Mucus	HN-2	07.RAW (F013055)	Neutrophil gelatinase-associated lipocalin OS=Homo sapiens GN=LCN2 PE=1 SV=2	P80188	SwissProt_2012_09.fasta	22588.9	1	3	3	4	0.000335	0.258
HN-SMG-Mucus	HN-2	07.RAW (F013055)	ATP synthase subunit beta, mitochondrial OS=Homo sapiens GN=ATP5B PE=1 SV=3	P06576	SwissProt_2012_09.fasta	56560.6	0.998	2	3	4	0.000335	0.0491
HN-SMG-Mucus	HN-2	07.RAW (F013055)	Keratin, type I cytoskeletal 14 OS=Homo sapiens GN=KRT14 PE=1 SV=4	P02533	SwissProt_2012_09.fasta	51562.5	1	4	4	5	0.000419	0.25
HN-SMG-Mucus	HN-2	07.RAW (F013055)	60S ribosomal protein L14 OS=Homo sapiens GN=RPL14 PE=1 SV=4	P50914	SwissProt_2012_09.fasta	23432.3	0.998	2	2	2	0.000168	0.107
HN-SMG-Mucus	HN-2	07.RAW (F013055)	Prelamin-A/C OS=Homo sapiens GN=LMNA PE=1 SV=1	P02545	SwissProt_2012_09.fasta	74140.7	1	7	7	7	0.000586	0.125
HN-SMG-Mucus	HN-2	07.RAW (F013055)	Elongation factor Tu, mitochondrial OS=Homo sapiens GN=TUFM PE=1 SV=2	P49411	SwissProt_2012_09.fasta	49542.4	1	3	3	3	0.000251	0.0819
HN-SMG-Mucus	HN-2	07.RAW (F013055)	Stress-70 protein, mitochondrial OS=Homo sapiens GN=HSPA9 PE=1 SV=2	P38646	SwissProt_2012_09.fasta	73681.3	1	4	5	6	0.000503	0.0869
HN-SMG-Mucus	HN-2	07.RAW (F013055)	Profilin-1 OS=Homo sapiens GN=PFN1 PE=1 SV=2	P07737	SwissProt_2012_09.fasta	15054.3	1	3	3	3	0.000251	0.3
HN-SMG-Mucus	HN-2	07.RAW (F013055)	Secretoglobin family 3A member 1 OS=Homo sapiens GN=SCGB3A1 PE=1 SV=2	Q96QR1	SwissProt_2012_09.fasta	10100.3	1	3	4	6	0.000503	0.356
HN-SMG-Mucus	HN-2	07.RAW (F013055)	14-3-3 protein epsilon OS=Homo sapiens GN=YWHAE PE=1 SV=1	P62258	SwissProt_2012_09.fasta	29175	0.999	2	2	2	0.000168	0.129
HN-SMG-Mucus	HN-2	07.RAW (F013055)	Neutrophil defensin 1 OS=Homo sapiens GN=DEFA1 PE=1 SV=1	P59665,P59666	SwissProt_2012_09.fasta	10201	0.998	2	2	2	0.000168	0.191
HN-SMG-Mucus	HN-2	07.RAW (F013055)	Periplakin OS=Homo sapiens GN=PPL PE=1 SV=4	O60437	SwissProt_2012_09.fasta	204747	1	4	4	4	0.000335	0.029
HN-SMG-Mucus	HN-2	07.RAW (F013055)	2,4-dienoyl-CoA reductase, mitochondrial OS=Homo sapiens GN=DECR1 PE=1 SV=1	Q16698	SwissProt_2012_09.fasta	36068.9	0.998	2	2	2	0.000168	0.0716
HN-SMG-Mucus	HN-2	07.RAW (F013055)	Mucin-5B OS=Homo sapiens GN=MUC5B PE=1 SV=3	Q9HC84	SwissProt_2012_09.fasta	596324	1	31	44	71	0.00595	0.0767
HN-SMG-Mucus	HN-2	07.RAW (F013055)	Epoxide hydrolase 1 OS=Homo sapiens GN=EPHX1 PE=1 SV=1	P07099	SwissProt_2012_09.fasta	52951.1	0.999	2	2	2	0.000168	0.044
HN-SMG-Mucus	HN-2	07.RAW (F013055)	Calnexin OS=Homo sapiens GN=CANX PE=1 SV=2	P27824	SwissProt_2012_09.fasta	67570.2	0.998	2	2	2	0.000168	0.0389
HN-SMG-Mucus	HN-2	07.RAW (F013055)	Zymogen granule protein 16 homolog B OS=Homo sapiens GN=ZG16B PE=1 SV=3	Q96DA0	SwissProt_2012_09.fasta	22739.4	0.998	2	2	2	0.000168	0.144
HN-SMG-Mucus	HN-2	07.RAW (F013055)	Ceruloplasmin OS=Homo sapiens GN=CP PE=1 SV=1	P00450	SwissProt_2012_09.fasta	122208	1	4	4	4	0.000335	0.0516
HN-SMG-Mucus	HN-2	07.RAW (F013055)	Voltage-dependent anion-selective channel protein 1 OS=Homo sapiens GN=VDAC1 PE=1 SV=2	P21796	SwissProt_2012_09.fasta	30773.9	1	3	3	3	0.000251	0.155
HN-SMG-Mucus	HN-2	07.RAW (F013055)	Protein transport protein Sec23B OS=Homo sapiens GN=SEC23B PE=1 SV=2	Q15437	SwissProt_2012_09.fasta	86481.1	0.998	2	2	2	0.000168	0.0339
HN-SMG-Mucus	HN-2	07.RAW (F013055)	Keratin, type II cytoskeletal 6A OS=Homo sapiens GN=KRT6A PE=1 SV=3	P02538	SwissProt_2012_09.fasta	60046.4	1	8	8	11	0.000921	0.287
HN-SMG-Mucus	HN-2	07.RAW (F013055)	Transaldolase OS=Homo sapiens GN=TALDO1 PE=1 SV=2	P37837	SwissProt_2012_09.fasta	37541.7	0.998	2	2	2	0.000168	0.0564
HN-SMG-Mucus	HN-2	07.RAW (F013055)	Prohibitin OS=Homo sapiens GN=PHB PE=1 SV=1	P35232	SwissProt_2012_09.fasta	29804.6	1	5	5	6	0.000503	0.191
HN-SMG-Mucus	HN-2	07.RAW (F013055)	Chloride intracellular channel protein 1 OS=Homo sapiens GN=CLIC1 PE=1 SV=4	O00299	SwissProt_2012_09.fasta	26923.3	0.998	2	3	3	0.000251	0.187
HN-SMG-Mucus	HN-2	07.RAW (F013055)	Clathrin heavy chain 1 OS=Homo sapiens GN=CLTC PE=1 SV=5	Q00610	SwissProt_2012_09.fasta	191619	1	5	7	7	0.000586	0.0406
HN-SMG-Mucus	HN-2	07.RAW (F013055)	Myoferlin OS=Homo sapiens GN=MYOF PE=1 SV=1	Q9NZM1	SwissProt_2012_09.fasta	234716	0.998	2	2	2	0.000168	0.0116
HN-SMG-Mucus	HN-2	07.RAW (F013055)	Lamin-B2 OS=Homo sapiens GN=LMNB2 PE=1 SV=3	Q03252	SwissProt_2012_09.fasta	67689.8	0.998	2	2	2	0.000168	0.0367
HN-SMG-Mucus	HN-2	07.RAW (F013055)	Lysozyme C OS=Homo sapiens GN=LYZ PE=1 SV=1	P61626	SwissProt_2012_09.fasta	16536.9	0.995	2	2	2	0.000168	0.108
HN-SMG-Mucus	HN-2	07.RAW (F013055)	Aconitate hydratase, mitochondrial OS=Homo sapiens GN=ACO2 PE=1 SV=2	Q99798	SwissProt_2012_09.fasta	85428	0.998	2	2	2	0.000168	0.0359
HN-SMG-Mucus	HN-2	07.RAW (F013055)	Protein disulfide-isomerase A4 OS=Homo sapiens GN=PDIA4 PE=1 SV=2	P13667	SwissProt_2012_09.fasta	72934	1	5	5	6	0.000503	0.104
HN-SMG-Mucus	HN-2	07.RAW (F013055)	Calpain-1 catalytic subunit OS=Homo sapiens GN=CAPN1 PE=1 SV=1	P07384	SwissProt_2012_09.fasta	81892.6	0.998	2	2	2	0.000168	0.035
HN-SMG-Mucus	HN-2	07.RAW (F013055)	Galectin-3-binding protein OS=Homo sapiens GN=LGALS3BP PE=1 SV=1	Q08380	SwissProt_2012_09.fasta	65332.1	1	4	4	4	0.000335	0.0991
HN-SMG-Mucus	HN-2	07.RAW (F013055)	Heterogeneous nuclear ribonucleoprotein D-like OS=Homo sapiens GN=HNRPDL PE=1 SV=3	O14979	SwissProt_2012_09.fasta	46438.6	0.998	2	2	2	0.000168	0.0429
HN-SMG-Mucus	HN-2	07.RAW (F013055)	Keratin, type II cytoskeletal 5 OS=Homo sapiens GN=KRT5 PE=1 SV=3	P13647	SwissProt_2012_09.fasta	62379.6	1	15	19	47	0.00394	0.263
HN-SMG-Mucus	HN-2	07.RAW (F013055)	Keratin, type I cytoskeletal 13 OS=Homo sapiens GN=KRT13 PE=1 SV=4	P13646	SwissProt_2012_09.fasta	49589.3	1	6	9	12	0.00101	0.238
HN-SMG-Mucus	HN-2	07.RAW (F013055)	Keratin, type I cytoskeletal 10 OS=Homo sapiens GN=KRT10 PE=1 SV=6	P13645	SwissProt_2012_09.fasta	58828.8	1	6	6	7	0.000586	0.224
HN-SMG-Mucus	HN-2	07.RAW (F013055)	Phosphatidylethanolamine-binding protein 1 OS=Homo sapiens GN=PEBP1 PE=1 SV=3	P30086	SwissProt_2012_09.fasta	21056.9	0.998	2	2	2	0.000168	0.123
HN-SMG-Mucus	HN-2	07.RAW (F013055)	Erythrocyte band 7 integral membrane protein OS=Homo sapiens GN=STOM PE=1 SV=3	P27105	SwissProt_2012_09.fasta	31732.1	0.998	2	2	2	0.000168	0.0903
HN-SMG-Mucus	HN-2	07.RAW (F013055)	Myosin-9 OS=Homo sapiens GN=MYH9 PE=1 SV=4	P35579	SwissProt_2012_09.fasta	226538	1	9	11	11	0.000921	0.0663
HN-SMG-Mucus	HN-2	07.RAW (F013055)	14-3-3 protein gamma OS=Homo sapiens GN=YWHAG PE=1 SV=2	P61981	SwissProt_2012_09.fasta	28303.1	1	3	3	3	0.000251	0.206
HN-SMG-Mucus	HN-2	07.RAW (F013055)	Annexin A2 OS=Homo sapiens GN=ANXA2 PE=1 SV=2	P07355	SwissProt_2012_09.fasta	38606.1	1	7	8	11	0.000921	0.245
HN-SMG-Mucus	HN-2	07.RAW (F013055)	Trifunctional enzyme subunit alpha, mitochondrial OS=Homo sapiens GN=HADHA PE=1 SV=2	P40939	SwissProt_2012_09.fasta	83001.9	1	3	3	3	0.000251	0.0577
HN-SMG-Mucus	HN-2	07.RAW (F013055)	Heterogeneous nuclear ribonucleoprotein K OS=Homo sapiens GN=HNRNPK PE=1 SV=1	P61978	SwissProt_2012_09.fasta	50978.5	0.998	2	2	2	0.000168	0.0432
HN-SMG-Mucus	HN-2	07.RAW (F013055)	Keratin, type II cytoskeletal 4 OS=Homo sapiens GN=KRT4 PE=1 SV=4	P19013	SwissProt_2012_09.fasta	57286.1	1	7	9	10	0.000838	0.18
HN-SMG-Mucus	HN-2	07.RAW (F013055)	Keratin, type I cytoskeletal 15 OS=Homo sapiens GN=KRT15 PE=1 SV=3	P19012	SwissProt_2012_09.fasta	49212.9	1	8	9	9	0.000754	0.39
HN-SMG-Mucus	HN-2	07.RAW (F013055)	Pyruvate dehydrogenase E1 component subunit beta, mitochondrial OS=Homo sapiens GN=PDHB PE=1 SV=3	P11177	SwissProt_2012_09.fasta	39233.4	1	3	4	4	0.000335	0.12
HN-SMG-Mucus	HN-2	07.RAW (F013055)	Malate dehydrogenase, mitochondrial OS=Homo sapiens GN=MDH2 PE=1 SV=3	P40926	SwissProt_2012_09.fasta	35503.7	1	3	3	3	0.000251	0.127
HN-SMG-Mucus	HN-2	07.RAW (F013055)	Heat shock protein HSP 90-beta OS=Homo sapiens GN=HSP90AB1 PE=1 SV=4	P08238	SwissProt_2012_09.fasta	83267.3	1	6	6	6	0.000503	0.108
HN-SMG-Mucus	HN-2	07.RAW (F013055)	Cathepsin D OS=Homo sapiens GN=CTSD PE=1 SV=1	P07339	SwissProt_2012_09.fasta	44553	1	3	4	4	0.000335	0.107
HN-SMG-Mucus	HN-2	07.RAW (F013055)	60S ribosomal protein L12 OS=Homo sapiens GN=RPL12 PE=1 SV=1	P30050	SwissProt_2012_09.fasta	17819.1	0.998	2	2	2	0.000168	0.145
HN-SMG-Mucus	HN-2	07.RAW (F013055)	14-3-3 protein zeta/delta OS=Homo sapiens GN=YWHAZ PE=1 SV=1	P63104	SwissProt_2012_09.fasta	27745.9	1	5	5	5	0.000419	0.29
HN-SMG-Mucus	HN-2	07.RAW (F013055)	Anterior gradient protein 2 homolog OS=Homo sapiens GN=AGR2 PE=1 SV=1	O95994	SwissProt_2012_09.fasta	19980.3	0.998	2	3	4	0.000335	0.16
HN-SMG-Mucus	HN-2	07.RAW (F013055)	Clusterin OS=Homo sapiens GN=CLU PE=1 SV=1	P10909	SwissProt_2012_09.fasta	52495	1	6	7	7	0.000586	0.149
HN-SMG-Mucus	HN-2	07.RAW (F013055)	UPF0762 protein C6orf58 OS=Homo sapiens GN=C6orf58 PE=1 SV=2	Q6P5S2	SwissProt_2012_09.fasta	37927.2	0.998	2	2	2	0.000168	0.115
HN-SMG-Mucus	HN-2	07.RAW (F013055)	Endoplasmic reticulum resident protein 29 OS=Homo sapiens GN=ERP29 PE=1 SV=4	P30040	SwissProt_2012_09.fasta	28994.9	0.998	2	2	2	0.000168	0.149
HN-SMG-Mucus	HN-2	07.RAW (F013055)	Poly(rC)-binding protein 2 OS=Homo sapiens GN=PCBP2 PE=1 SV=1	Q15366	SwissProt_2012_09.fasta	38580.9	0.998	2	2	2	0.000168	0.104
HN-SMG-Mucus	HN-2	07.RAW (F013055)	Poly(rC)-binding protein 1 OS=Homo sapiens GN=PCBP1 PE=1 SV=2	Q15365	SwissProt_2012_09.fasta	37498.2	0.998	2	2	2	0.000168	0.0618
HN-SMG-Mucus	HN-2	07.RAW (F013055)	Cytochrome b-c1 complex subunit 1, mitochondrial OS=Homo sapiens GN=UQCRC1 PE=1 SV=3	P31930	SwissProt_2012_09.fasta	52645.9	0.999	2	3	3	0.000251	0.0458
HN-SMG-Mucus	HN-2	07.RAW (F013055)	3-hydroxyacyl-CoA dehydrogenase type-2 OS=Homo sapiens GN=HSD17B10 PE=1 SV=3	Q99714	SwissProt_2012_09.fasta	26923.1	0.998	2	2	3	0.000251	0.165
HN-SMG-Mucus	HN-2	07.RAW (F013055)	Keratin, type I cytoskeletal 9 OS=Homo sapiens GN=KRT9 PE=1 SV=3	P35527	SwissProt_2012_09.fasta	62065.9	1	4	4	4	0.000335	0.0963
HN-SMG-Mucus	HN-2	07.RAW (F013055)	Alpha-actinin-4 OS=Homo sapiens GN=ACTN4 PE=1 SV=2	O43707	SwissProt_2012_09.fasta	104857	1	5	5	5	0.000419	0.0571
HN-SMG-Mucus	HN-2	07.RAW (F013055)	Filamin-B OS=Homo sapiens GN=FLNB PE=1 SV=2	O75369	SwissProt_2012_09.fasta	278159	1	3	3	3	0.000251	0.0158
HN-SMG-Mucus	HN-2	07.RAW (F013055)	Splicing factor 3B subunit 1 OS=Homo sapiens GN=SF3B1 PE=1 SV=3	O75533	SwissProt_2012_09.fasta	145835	0.998	2	2	2	0.000168	0.0199
HN-SMG-Mucus	HN-2	07.RAW (F013055)	Hexokinase-1 OS=Homo sapiens GN=HK1 PE=1 SV=3	P19367	SwissProt_2012_09.fasta	102488	0.998	2	2	2	0.000168	0.024
HN-SMG-Mucus	HN-2	07.RAW (F013055)	BPI fold-containing family B member 1 OS=Homo sapiens GN=BPIFB1 PE=2 SV=1	Q8TDL5	SwissProt_2012_09.fasta	52443.8	1	11	18	30	0.00251	0.31
HN-SMG-Mucus	HN-2	07.RAW (F013055)	Acid ceramidase OS=Homo sapiens GN=ASAH1 PE=1 SV=5	Q13510	SwissProt_2012_09.fasta	44661.1	0.998	2	3	3	0.000251	0.0709
HN-SMG-Mucus	HN-2	07.RAW (F013055)	Nucleolin OS=Homo sapiens GN=NCL PE=1 SV=3	P19338	SwissProt_2012_09.fasta	76615.9	1	6	6	6	0.000503	0.0887
HN-SMG-Mucus	HN-2	07.RAW (F013055)	Glutamate dehydrogenase 1, mitochondrial OS=Homo sapiens GN=GLUD1 PE=1 SV=2	P00367	SwissProt_2012_09.fasta	61399.7	1	3	3	3	0.000251	0.0914
HN-SMG-Mucus	HN-2	07.RAW (F013055)	Tropomyosin alpha-3 chain OS=Homo sapiens GN=TPM3 PE=1 SV=1	P06753	SwissProt_2012_09.fasta	32820.2	0.997	2	2	2	0.000168	0.081
HN-SMG-Mucus	HN-2	07.RAW (F013055)	Nucleophosmin OS=Homo sapiens GN=NPM1 PE=1 SV=2	P06748	SwissProt_2012_09.fasta	32575.5	0.998	2	4	4	0.000335	0.119
HN-SMG-Mucus	HN-2	07.RAW (F013055)	Glucose-6-phosphate isomerase OS=Homo sapiens GN=GPI PE=1 SV=4	P06744	SwissProt_2012_09.fasta	63148.5	0.998	2	2	2	0.000168	0.0448
HN-SMG-Mucus	HN-2	07.RAW (F013055)	Alpha-enolase OS=Homo sapiens GN=ENO1 PE=1 SV=2	P06733	SwissProt_2012_09.fasta	47170.2	1	8	8	11	0.000921	0.276
HN-SMG-Mucus	HN-2	07.RAW (F013055)	60S ribosomal protein L19 OS=Homo sapiens GN=RPL19 PE=1 SV=1	P84098	SwissProt_2012_09.fasta	23467.4	0.998	2	2	2	0.000168	0.133
HN-SMG-Mucus	HN-2	07.RAW (F013055)	L-lactate dehydrogenase A chain OS=Homo sapiens GN=LDHA PE=1 SV=2	P00338	SwissProt_2012_09.fasta	36689.2	1	4	4	4	0.000335	0.169
HN-SMG-Mucus	HN-2	07.RAW (F013055)	Plectin OS=Homo sapiens GN=PLEC PE=1 SV=3	Q15149	SwissProt_2012_09.fasta	531784	1	16	16	17	0.00142	0.0393
HN-SMG-Mucus	HN-2	07.RAW (F013055)	ATP synthase subunit gamma, mitochondrial OS=Homo sapiens GN=ATP5C1 PE=1 SV=1	P36542	SwissProt_2012_09.fasta	32998	0.998	2	2	2	0.000168	0.0638
HN-SMG-Mucus	HN-2	07.RAW (F013055)	Major vault protein OS=Homo sapiens GN=MVP PE=1 SV=4	Q14764	SwissProt_2012_09.fasta	99326	1	3	3	3	0.000251	0.0437
HN-SMG-Mucus	HN-2	07.RAW (F013055)	Serine/threonine-protein phosphatase PP1-gamma catalytic subunit OS=Homo sapiens GN=PPP1CC PE=1 SV=1	P36873,P62136,P62140	SwissProt_2012_09.fasta	37188.3	0.998	2	2	2	0.000168	0.108
HN-SMG-Mucus	HN-2	07.RAW (F013055)	Thioredoxin OS=Homo sapiens GN=TXN PE=1 SV=3	P10599	SwissProt_2012_09.fasta	11737.3	1	2	2	2	0.000168	0.21
HN-SMG-Mucus	HN-2	07.RAW (F013055)	WAP four-disulfide core domain protein 2 OS=Homo sapiens GN=WFDC2 PE=1 SV=2	Q14508	SwissProt_2012_09.fasta	12992.5	0.998	2	2	2	0.000168	0.258
HN-SMG-Mucus	HN-2	07.RAW (F013055)	Proactivator polypeptide OS=Homo sapiens GN=PSAP PE=1 SV=2	P07602	SwissProt_2012_09.fasta	58112	0.998	2	2	2	0.000168	0.0477
HN-SMG-Mucus	HN-2	07.RAW (F013055)	Protein S100-A6 OS=Homo sapiens GN=S100A6 PE=1 SV=1	P06703	SwissProt_2012_09.fasta	10180.4	0.998	2	2	2	0.000168	0.167
HN-SMG-Mucus	HN-2	07.RAW (F013055)	ATP-dependent RNA helicase A OS=Homo sapiens GN=DHX9 PE=1 SV=4	Q08211	SwissProt_2012_09.fasta	140962	1	4	4	4	0.000335	0.0378
HN-SMG-Mucus	HN-2	07.RAW (F013055)	Filamin-A OS=Homo sapiens GN=FLNA PE=1 SV=4	P21333	SwissProt_2012_09.fasta	280729	1	3	3	3	0.000251	0.0151
HN-SMG-Mucus	HN-2	07.RAW (F013055)	BPI fold-containing family A member 1 OS=Homo sapiens GN=BPIFA1 PE=1 SV=1	Q9NP55	SwissProt_2012_09.fasta	26714.1	1	3	3	3	0.000251	0.188
HN-SMG-Mucus	HN-2	07.RAW (F013055)	Spectrin alpha chain, non-erythrocytic 1 OS=Homo sapiens GN=SPTAN1 PE=1 SV=3	Q13813	SwissProt_2012_09.fasta	284543	1	3	4	4	0.000335	0.0174
HN-SMG-Mucus	HN-2	07.RAW (F013055)	Serpin B3 OS=Homo sapiens GN=SERPINB3 PE=1 SV=2	P29508	SwissProt_2012_09.fasta	44565.9	0.998	2	3	3	0.000251	0.0744
HN-SMG-Mucus	HN-2	07.RAW (F013055)	40S ribosomal protein SA OS=Homo sapiens GN=RPSA PE=1 SV=4	P08865	SwissProt_2012_09.fasta	32854.1	0.998	2	2	2	0.000168	0.102
HN-SMG-Mucus	HN-2	07.RAW (F013055)	Keratin, type II cytoskeletal 1 OS=Homo sapiens GN=KRT1 PE=1 SV=6	P04264	SwissProt_2012_09.fasta	66040.3	1	11	11	13	0.00109	0.23
HN-SMG-Mucus	HN-2	07.RAW (F013055)	Tumor-associated calcium signal transducer 2 OS=Homo sapiens GN=TACSTD2 PE=1 SV=3	P09758	SwissProt_2012_09.fasta	35709.8	0.998	2	3	3	0.000251	0.0867
HN-SMG-Mucus	HN-2	07.RAW (F013055)	Collagen alpha-1(I) chain OS=Homo sapiens GN=COL1A1 PE=1 SV=5	P02452	SwissProt_2012_09.fasta	138941	0.996	2	2	2	0.000168	0.013
HN-SMG-Mucus	HN-2	07.RAW (F013055)	ADP/ATP translocase 2 OS=Homo sapiens GN=SLC25A5 PE=1 SV=7	P05141	SwissProt_2012_09.fasta	32853.5	0.999	2	3	3	0.000251	0.0839
HN-SMG-Mucus	HN-2	07.RAW (F013055)	Myosin light polypeptide 6 OS=Homo sapiens GN=MYL6 PE=1 SV=2	P60660	SwissProt_2012_09.fasta	16929.8	1	3	3	3	0.000251	0.172
HN-SMG-Mucus	HN-2	07.RAW (F013055)	Heterogeneous nuclear ribonucleoproteins A2/B1 OS=Homo sapiens GN=HNRNPA2B1 PE=1 SV=2	P22626	SwissProt_2012_09.fasta	37430.3	0.999	2	2	2	0.000168	0.051
HN-SMG-Mucus	HN-2	07.RAW (F013055)	Dynactin subunit 2 OS=Homo sapiens GN=DCTN2 PE=1 SV=4	Q13561	SwissProt_2012_09.fasta	44231.7	0.998	2	2	2	0.000168	0.0848
HN-SMG-Mucus	HN-2	07.RAW (F013055)	Ubiquitin-like modifier-activating enzyme 1 OS=Homo sapiens GN=UBA1 PE=1 SV=3	P22314	SwissProt_2012_09.fasta	117850	1	4	4	4	0.000335	0.0473
HN-SMG-Mucus	HN-2	07.RAW (F013055)	Heat shock protein HSP 90-alpha OS=Homo sapiens GN=HSP90AA1 PE=1 SV=5	P07900	SwissProt_2012_09.fasta	84663.2	0.999	2	3	3	0.000251	0.0669
HN-SMG-Mucus	HN-2	07.RAW (F013055)	Arachidonate 15-lipoxygenase OS=Homo sapiens GN=ALOX15 PE=1 SV=3	P16050	SwissProt_2012_09.fasta	74805.9	1	6	6	7	0.000586	0.128
HN-SMG-Mucus	HN-2	07.RAW (F013055)	Neuroblast differentiation-associated protein AHNAK OS=Homo sapiens GN=AHNAK PE=1 SV=2	Q09666	SwissProt_2012_09.fasta	629104	1	11	11	11	0.000921	0.0273
HN-SMG-Mucus	HN-2	07.RAW (F013055)	Gelsolin OS=Homo sapiens GN=GSN PE=1 SV=1	P06396	SwissProt_2012_09.fasta	85697.8	1	4	4	4	0.000335	0.0627
HN-SMG-Mucus	HN-2	07.RAW (F013055)	6-phosphogluconate dehydrogenase, decarboxylating OS=Homo sapiens GN=PGD PE=1 SV=3	P52209	SwissProt_2012_09.fasta	53141.9	1	3	3	4	0.000335	0.106
HN-SMG-Mucus	HN-2	07.RAW (F013055)	Serotransferrin OS=Homo sapiens GN=TF PE=1 SV=3	P02787	SwissProt_2012_09.fasta	77064.3	1	5	5	5	0.000419	0.0931
HN-SMG-Mucus	HN-2	07.RAW (F013055)	Transitional endoplasmic reticulum ATPase OS=Homo sapiens GN=VCP PE=1 SV=4	P55072	SwissProt_2012_09.fasta	89324.8	1	6	6	6	0.000503	0.0993
HN-SMG-Mucus	HN-2	07.RAW (F013055)	Ig alpha-1 chain C region OS=Homo sapiens GN=IGHA1 PE=1 SV=2	P01876	SwissProt_2012_09.fasta	37653.8	1	4	5	5	0.000419	0.13
HN-SMG-Mucus	HN-2	07.RAW (F013055)	ATP synthase subunit O, mitochondrial OS=Homo sapiens GN=ATP5O PE=1 SV=1	P48047	SwissProt_2012_09.fasta	23277.4	0.995	2	2	2	0.000168	0.136
HN-SMG-Mucus	HN-2	07.RAW (F013055)	Selenium-binding protein 1 OS=Homo sapiens GN=SELENBP1 PE=1 SV=2	Q13228	SwissProt_2012_09.fasta	52392	0.998	2	2	2	0.000168	0.0508
HN-SMG-Mucus	HN-2	07.RAW (F013055)	Serum albumin OS=Homo sapiens GN=ALB PE=1 SV=2	P02768	SwissProt_2012_09.fasta	69366.9	1	9	9	14	0.00117	0.156
HN-SMG-Mucus	HN-2	07.RAW (F013055)	Succinyl-CoA ligase [ADP-forming] subunit beta, mitochondrial OS=Homo sapiens GN=SUCLA2 PE=1 SV=3	Q9P2R7	SwissProt_2012_09.fasta	50318.1	0.998	2	2	2	0.000168	0.0475
HN-SMG-Mucus	HN-2	07.RAW (F013055)	Alpha-1-acid glycoprotein 1 OS=Homo sapiens GN=ORM1 PE=1 SV=1	P02763	SwissProt_2012_09.fasta	23512.1	0.998	2	2	2	0.000168	0.0846
HN-SMG-Mucus	HN-2	07.RAW (F013055)	Ig gamma-1 chain C region OS=Homo sapiens GN=IGHG1 PE=1 SV=1	P01857	SwissProt_2012_09.fasta	36105	1	5	6	6	0.000503	0.218
HN-SMG-Mucus	HN-2	07.RAW (F013055)	Ezrin OS=Homo sapiens GN=EZR PE=1 SV=4	P15311	SwissProt_2012_09.fasta	69414.7	1	4	5	6	0.000503	0.0802
HN-SMG-Mucus	HN-2	07.RAW (F013055)	Protein disulfide-isomerase OS=Homo sapiens GN=P4HB PE=1 SV=3	P07237	SwissProt_2012_09.fasta	57118.1	1	6	6	6	0.000503	0.165
HN-SMG-Mucus	HN-2	07.RAW (F013055)	60 kDa heat shock protein, mitochondrial OS=Homo sapiens GN=HSPD1 PE=1 SV=2	P10809	SwissProt_2012_09.fasta	61055.7	1	6	6	7	0.000586	0.148
HN-SMG-Mucus	HN-2	07.RAW (F013055)	Ig kappa chain C region OS=Homo sapiens GN=IGKC PE=1 SV=1	P01834	SwissProt_2012_09.fasta	11608.6	0.999	2	3	3	0.000251	0.358
HN-SMG-Mucus	HN-2	07.RAW (F013055)	Polymeric immunoglobulin receptor OS=Homo sapiens GN=PIGR PE=1 SV=4	P01833	SwissProt_2012_09.fasta	83283.4	1	3	3	3	0.000251	0.0353
HN-SMG-Mucus	HN-2	07.RAW (F013055)	Prohibitin-2 OS=Homo sapiens GN=PHB2 PE=1 SV=2	Q99623	SwissProt_2012_09.fasta	33297.6	1	3	3	3	0.000251	0.134
HN-SMG-Mucus	HN-2	07.RAW (F013055)	Transcription intermediary factor 1-beta OS=Homo sapiens GN=TRIM28 PE=1 SV=5	Q13263	SwissProt_2012_09.fasta	88549	0.998	2	2	2	0.000168	0.0311
HN-SMG-Mucus	HN-2	07.RAW (F013055)	Antileukoproteinase OS=Homo sapiens GN=SLPI PE=1 SV=2	P03973	SwissProt_2012_09.fasta	14326	1	4	6	8	0.00067	0.394
HN-SMG-Mucus	HN-2	07.RAW (F013055)	Transcobalamin-1 OS=Homo sapiens GN=TCN1 PE=1 SV=2	P20061	SwissProt_2012_09.fasta	48207.7	0.999	2	2	2	0.000168	0.0693
HN-SMG-Mucus	HN-2	07.RAW (F013055)	40S ribosomal protein S19 OS=Homo sapiens GN=RPS19 PE=1 SV=2	P39019	SwissProt_2012_09.fasta	16060.5	0.998	2	2	2	0.000168	0.159
HN-SMG-Mucus	HN-2	07.RAW (F013055)	Heat shock 70 kDa protein 1A/1B OS=Homo sapiens GN=HSPA1A PE=1 SV=5	P08107	SwissProt_2012_09.fasta	70054	1	2	3	3	0.000251	0.0733
HN-SMG-Mucus	HN-2	07.RAW (F013055)	Haptoglobin OS=Homo sapiens GN=HP PE=1 SV=1	P00738	SwissProt_2012_09.fasta	45204.9	1	2	3	3	0.000251	0.064
HN-SMG-Mucus	HN-2	07.RAW (F013055)	Alpha-1-antichymotrypsin OS=Homo sapiens GN=SERPINA3 PE=1 SV=2	P01011	SwissProt_2012_09.fasta	47653	1	4	6	6	0.000503	0.135
HN-SMG-Mucus	HN-2	07.RAW (F013055)	Histone H2A type 1 OS=Homo sapiens GN=HIST1H2AG PE=1 SV=2	P0C0S8,Q16777,Q6FI13,Q96KK5,Q99878,Q9BTM1	SwissProt_2012_09.fasta	13906.8	0.999	2	3	3	0.000251	0.215
HN-SMG-Mucus	HN-2	07.RAW (F013055)	Fibrinogen beta chain OS=Homo sapiens GN=FGB PE=1 SV=2	P02675	SwissProt_2012_09.fasta	55928.6	1	4	5	5	0.000419	0.104
HN-SMG-Mucus	HN-2	07.RAW (F013055)	Lactotransferrin OS=Homo sapiens GN=LTF PE=1 SV=6	P02788	SwissProt_2012_09.fasta	78182.3	1	21	25	48	0.00402	0.369
HN-SMG-Mucus	HN-2	07.RAW (F013055)	Keratin, type II cytoskeletal 8 OS=Homo sapiens GN=KRT8 PE=1 SV=7	P05787	SwissProt_2012_09.fasta	53706.2	1	10	13	14	0.00117	0.257
HN-SMG-Mucus	HN-2	07.RAW (F013055)	Ornithine aminotransferase, mitochondrial OS=Homo sapiens GN=OAT PE=1 SV=1	P04181	SwissProt_2012_09.fasta	48536.2	0.999	2	2	2	0.000168	0.0547
HN-SMG-Mucus	HN-2	07.RAW (F013055)	Heat shock protein beta-1 OS=Homo sapiens GN=HSPB1 PE=1 SV=2	P04792	SwissProt_2012_09.fasta	22782.6	1	3	3	3	0.000251	0.18
HN-SMG-Mucus	HN-2	07.RAW (F013055)	Keratin, type I cytoskeletal 18 OS=Homo sapiens GN=KRT18 PE=1 SV=2	P05783	SwissProt_2012_09.fasta	48059	1	4	5	6	0.000503	0.149
HN-SMG-Mucus	HN-2	07.RAW (F013055)	IgGFc-binding protein OS=Homo sapiens GN=FCGBP PE=1 SV=3	Q9Y6R7	SwissProt_2012_09.fasta	571983	1	16	17	18	0.00151	0.0446
HN-SMG-Mucus	HN-2	07.RAW (F013055)	L-lactate dehydrogenase B chain OS=Homo sapiens GN=LDHB PE=1 SV=2	P07195	SwissProt_2012_09.fasta	36638.6	1	3	3	3	0.000251	0.102
HN-SMG-Mucus	HN-2	07.RAW (F013055)	Tubulin beta chain OS=Homo sapiens GN=TUBB PE=1 SV=2	P07437	SwissProt_2012_09.fasta	49670.6	1	3	3	4	0.000335	0.0698
HN-SMG-Mucus	HN-2	07.RAW (F013055)	Keratin, type I cytoskeletal 19 OS=Homo sapiens GN=KRT19 PE=1 SV=4	P08727	SwissProt_2012_09.fasta	44107.1	1	12	16	26	0.00218	0.39
HN-SMG-Mucus	HN-2	07.RAW (F013055)	Neutral alpha-glucosidase AB OS=Homo sapiens GN=GANAB PE=1 SV=3	Q14697	SwissProt_2012_09.fasta	106876	0.998	2	2	2	0.000168	0.0254
HN-SMG-Mucus	HN-2	07.RAW (F013055)	78 kDa glucose-regulated protein OS=Homo sapiens GN=HSPA5 PE=1 SV=2	P11021	SwissProt_2012_09.fasta	72334.7	1	3	3	3	0.000251	0.0688
HN-SMG-Mucus	HN-2	07.RAW (F013055)	Plasminogen activator inhibitor 1 RNA-binding protein OS=Homo sapiens GN=SERBP1 PE=1 SV=2	Q8NC51	SwissProt_2012_09.fasta	44965.8	0.998	2	2	2	0.000168	0.0711
HN-SMG-Mucus	HN-2	07.RAW (F013055)	Macrophage-capping protein OS=Homo sapiens GN=CAPG PE=1 SV=2	P40121	SwissProt_2012_09.fasta	38498.9	0.998	2	2	2	0.000168	0.069
HN-SMG-Mucus	HN-2	07.RAW (F013055)	Actin-related protein 2 OS=Homo sapiens GN=ACTR2 PE=1 SV=1	P61160	SwissProt_2012_09.fasta	44761.7	0.998	2	2	2	0.000168	0.0609
HN-SMG-Mucus	HN-2	07.RAW (F013055)	Heat shock cognate 71 kDa protein OS=Homo sapiens GN=HSPA8 PE=1 SV=1	P11142	SwissProt_2012_09.fasta	70899.8	1	3	3	3	0.000251	0.0635
HN-SMG-Mucus	HN-2	07.RAW (F013055)	Ig lambda-2 chain C regions OS=Homo sapiens GN=IGLC2 PE=1 SV=1	P0CG05,P0CG06	SwissProt_2012_09.fasta	11293.2	0.998	2	3	3	0.000251	0.274
HN-SMG-Mucus	HN-2	07.RAW (F013055)	Vitamin D-binding protein OS=Homo sapiens GN=GC PE=1 SV=1	P02774	SwissProt_2012_09.fasta	52964.6	0.999	2	4	4	0.000335	0.0717
HN-SMG-Mucus	HN-2	07.RAW (F013055)	Translational activator GCN1 OS=Homo sapiens GN=GCN1L1 PE=1 SV=6	Q92616	SwissProt_2012_09.fasta	292764	0.999	2	2	3	0.000251	0.0101
HN-SMG-Mucus	HN-2	07.RAW (F013055)	Voltage-dependent anion-selective channel protein 2 OS=Homo sapiens GN=VDAC2 PE=1 SV=2	P45880	SwissProt_2012_09.fasta	31567.3	1	5	5	5	0.000419	0.224
HN-SMG-Mucus	HN-2	07.RAW (F013055)	Prolactin-inducible protein OS=Homo sapiens GN=PIP PE=1 SV=1	P12273	SwissProt_2012_09.fasta	16573.1	1	4	4	7	0.000586	0.37
HN-SMG-Mucus	HN-2	07.RAW (F013055)	Complement C4-B OS=Homo sapiens GN=C4B PE=1 SV=1	P0C0L5	SwissProt_2012_09.fasta	192795	0.998	2	2	2	0.000168	0.0206
HN-SMG-Mucus	HN-2	07.RAW (F013055)	Succinyl-CoA ligase [GDP-forming] subunit beta, mitochondrial OS=Homo sapiens GN=SUCLG2 PE=1 SV=2	Q96I99	SwissProt_2012_09.fasta	46511.7	0.998	2	2	2	0.000168	0.116
HN-SMG-Mucus	HN-2	07.RAW (F013055)	Aldehyde dehydrogenase, mitochondrial OS=Homo sapiens GN=ALDH2 PE=1 SV=2	P05091	SwissProt_2012_09.fasta	56381.4	0.998	2	2	2	0.000168	0.0426
HN-SMG-Mucus	HN-2	07.RAW (F013055)	Apolipoprotein D OS=Homo sapiens GN=APOD PE=1 SV=1	P05090	SwissProt_2012_09.fasta	21276.1	0.998	2	2	2	0.000168	0.0952
HN-SMG-Mucus	HN-2	07.RAW (F013055)	Transketolase OS=Homo sapiens GN=TKT PE=1 SV=3	P29401	SwissProt_2012_09.fasta	67879.4	1	3	3	3	0.000251	0.0738
HN-SMG-Mucus	HN-2	07.RAW (F013055)	T-complex protein 1 subunit epsilon OS=Homo sapiens GN=CCT5 PE=1 SV=1	P48643	SwissProt_2012_09.fasta	59672.4	0.998	2	2	2	0.000168	0.061
HN-SMG-Mucus	HN-2	07.RAW (F013055)	Annexin A5 OS=Homo sapiens GN=ANXA5 PE=1 SV=2	P08758	SwissProt_2012_09.fasta	35938.6	1	4	5	6	0.000503	0.203
HN-SMG-Mucus	HN-2	07.RAW (F013055)	Desmoplakin OS=Homo sapiens GN=DSP PE=1 SV=3	P15924	SwissProt_2012_09.fasta	331781	1	8	9	10	0.000838	0.0338
HN-SMG-Mucus	HN-2	07.RAW (F013055)	D-3-phosphoglycerate dehydrogenase OS=Homo sapiens GN=PHGDH PE=1 SV=4	O43175	SwissProt_2012_09.fasta	56650.6	1	3	3	3	0.000251	0.0732
HN-SMG-Mucus	HN-2	07.RAW (F013055)	40S ribosomal protein S3 OS=Homo sapiens GN=RPS3 PE=1 SV=2	P23396	SwissProt_2012_09.fasta	26688.6	1	3	3	3	0.000251	0.156
HN-SMG-Mucus	HN-2	07.RAW (F013055)	Stomatin-like protein 2 OS=Homo sapiens GN=STOML2 PE=1 SV=1	Q9UJZ1	SwissProt_2012_09.fasta	38534.5	0.998	2	2	3	0.000251	0.0871
HN-SMG-Mucus	HN-2	07.RAW (F013055)	Actin, cytoplasmic 2 OS=Homo sapiens GN=ACTG1 PE=1 SV=1	P63261	SwissProt_2012_09.fasta	41793.9	1	4	4	4	0.000335	0.141
HN-SMG-Mucus	HN-2	07.RAW (F013055)	Keratin, type II cytoskeletal 7 OS=Homo sapiens GN=KRT7 PE=1 SV=5	P08729	SwissProt_2012_09.fasta	51387.3	1	8	8	8	0.00067	0.194
HN-SMG-Mucus	HN-2	07.RAW (F013055)	Dihydrolipoyl dehydrogenase, mitochondrial OS=Homo sapiens GN=DLD PE=1 SV=2	P09622	SwissProt_2012_09.fasta	54177.5	1	3	3	3	0.000251	0.0747
HN-SMG-Mucus	HN-2	07.RAW (F013055)	Sodium/potassium-transporting ATPase subunit beta-1 OS=Homo sapiens GN=ATP1B1 PE=1 SV=1	P05026	SwissProt_2012_09.fasta	35062.9	0.998	2	2	2	0.000168	0.0825
HN-SMG-Mucus	HN-2	07.RAW (F013055)	Sodium/potassium-transporting ATPase subunit alpha-1 OS=Homo sapiens GN=ATP1A1 PE=1 SV=1	P05023	SwissProt_2012_09.fasta	112900	1	3	4	4	0.000335	0.0518
HN-SMG-Mucus	HN-2	07.RAW (F013055)	Protein S100-A14 OS=Homo sapiens GN=S100A14 PE=1 SV=1	Q9HCY8	SwissProt_2012_09.fasta	11662.2	0.997	2	2	2	0.000168	0.25
HN-SMG-Mucus	HN-2	07.RAW (F013055)	Guanine nucleotide-binding protein subunit beta-2-like 1 OS=Homo sapiens GN=GNB2L1 PE=1 SV=3	P63244	SwissProt_2012_09.fasta	35077	0.998	2	2	2	0.000168	0.0599
HN-SMG-Mucus	HN-2	07.RAW (F013055)	Deleted in malignant brain tumors 1 protein OS=Homo sapiens GN=DMBT1 PE=1 SV=2	Q9UGM3	SwissProt_2012_09.fasta	260726	1	15	20	51	0.00427	0.114
HN-SMG-Mucus	HN-2	07.RAW (F013055)	Ribonuclease inhibitor OS=Homo sapiens GN=RNH1 PE=1 SV=2	P13489	SwissProt_2012_09.fasta	49974.4	1	3	3	3	0.000251	0.0889
HN-SMG-Mucus	HN-2	07.RAW (F013055)	Elongation factor 2 OS=Homo sapiens GN=EEF2 PE=1 SV=4	P13639	SwissProt_2012_09.fasta	95340.1	1	7	8	10	0.000838	0.127
HN-SMG-Mucus	HN-2	08.RAW (F013057)	Alcohol dehydrogenase [NADP(+)] OS=Homo sapiens GN=AKR1A1 PE=1 SV=3	P14550	SwissProt_2012_09.fasta	36573.6	0.998	2	2	2	0.000172	0.0923
HN-SMG-Mucus	HN-2	08.RAW (F013057)	Transgelin-2 OS=Homo sapiens GN=TAGLN2 PE=1 SV=3	P37802	SwissProt_2012_09.fasta	22391.9	0.998	2	2	3	0.000258	0.146
HN-SMG-Mucus	HN-2	08.RAW (F013057)	Moesin OS=Homo sapiens GN=MSN PE=1 SV=3	P26038	SwissProt_2012_09.fasta	67821.8	0.999	2	2	2	0.000172	0.0312
HN-SMG-Mucus	HN-2	08.RAW (F013057)	Fibrinogen gamma chain OS=Homo sapiens GN=FGG PE=1 SV=3	P02679	SwissProt_2012_09.fasta	51513.3	0.999	2	2	2	0.000172	0.0706
HN-SMG-Mucus	HN-2	08.RAW (F013057)	Keratin, type I cytoskeletal 24 OS=Homo sapiens GN=KRT24 PE=1 SV=1	Q2M2I5	SwissProt_2012_09.fasta	55088.5	0.998	2	2	2	0.000172	0.061
HN-SMG-Mucus	HN-2	08.RAW (F013057)	Mucin-5AC (Fragments) OS=Homo sapiens GN=MUC5AC PE=1 SV=3	P98088	SwissProt_2012_09.fasta	526585	1	6	8	9	0.000775	0.0254
HN-SMG-Mucus	HN-2	08.RAW (F013057)	Glutamate dehydrogenase 1, mitochondrial OS=Homo sapiens GN=GLUD1 PE=1 SV=2	P00367	SwissProt_2012_09.fasta	61399.7	1	2	2	3	0.000258	0.052
HN-SMG-Mucus	HN-2	08.RAW (F013057)	Src substrate cortactin OS=Homo sapiens GN=CTTN PE=1 SV=2	Q14247	SwissProt_2012_09.fasta	61585.5	0.996	2	2	2	0.000172	0.0255
HN-SMG-Mucus	HN-2	08.RAW (F013057)	Heat shock protein beta-1 OS=Homo sapiens GN=HSPB1 PE=1 SV=2	P04792	SwissProt_2012_09.fasta	22782.6	1	3	4	5	0.00043	0.268
HN-SMG-Mucus	HN-2	08.RAW (F013057)	Keratin, type I cytoskeletal 9 OS=Homo sapiens GN=KRT9 PE=1 SV=3	P35527	SwissProt_2012_09.fasta	62065.9	1	6	6	6	0.000516	0.213
HN-SMG-Mucus	HN-2	08.RAW (F013057)	60S ribosomal protein L4 OS=Homo sapiens GN=RPL4 PE=1 SV=5	P36578	SwissProt_2012_09.fasta	47699.1	1	3	3	3	0.000258	0.101
HN-SMG-Mucus	HN-2	08.RAW (F013057)	Cytoplasmic dynein 1 heavy chain 1 OS=Homo sapiens GN=DYNC1H1 PE=1 SV=5	Q14204	SwissProt_2012_09.fasta	532406	0.998	2	2	2	0.000172	0.0071
HN-SMG-Mucus	HN-2	08.RAW (F013057)	Endoplasmin OS=Homo sapiens GN=HSP90B1 PE=1 SV=1	P14625	SwissProt_2012_09.fasta	92471.7	0.998	2	3	3	0.000258	0.0461
HN-SMG-Mucus	HN-2	08.RAW (F013057)	Tubulin alpha-1B chain OS=Homo sapiens GN=TUBA1B PE=1 SV=1	P68363	SwissProt_2012_09.fasta	50151.7	0.998	2	2	2	0.000172	0.0887
HN-SMG-Mucus	HN-2	08.RAW (F013057)	Pyruvate kinase isozymes M1/M2 OS=Homo sapiens GN=PKM PE=1 SV=4	P14618	SwissProt_2012_09.fasta	57937.5	1	5	6	7	0.000602	0.162
HN-SMG-Mucus	HN-2	08.RAW (F013057)	Tubulin beta chain OS=Homo sapiens GN=TUBB PE=1 SV=2	P07437	SwissProt_2012_09.fasta	49670.6	1	2	2	3	0.000258	0.115
HN-SMG-Mucus	HN-2	08.RAW (F013057)	Keratin, type I cytoskeletal 17 OS=Homo sapiens GN=KRT17 PE=1 SV=2	Q04695	SwissProt_2012_09.fasta	48106.7	1	4	4	4	0.000344	0.157
HN-SMG-Mucus	HN-2	08.RAW (F013057)	Alpha-1-antichymotrypsin OS=Homo sapiens GN=SERPINA3 PE=1 SV=2	P01011	SwissProt_2012_09.fasta	47653	0.998	2	2	2	0.000172	0.0426
HN-SMG-Mucus	HN-2	08.RAW (F013057)	Voltage-dependent anion-selective channel protein 2 OS=Homo sapiens GN=VDAC2 PE=1 SV=2	P45880	SwissProt_2012_09.fasta	31567.3	1	4	4	4	0.000344	0.17
HN-SMG-Mucus	HN-2	08.RAW (F013057)	Protein disulfide-isomerase A3 OS=Homo sapiens GN=PDIA3 PE=1 SV=4	P30101	SwissProt_2012_09.fasta	56784.6	0.999	2	2	3	0.000258	0.0752
HN-SMG-Mucus	HN-2	08.RAW (F013057)	Calpain-2 catalytic subunit OS=Homo sapiens GN=CAPN2 PE=1 SV=6	P17655	SwissProt_2012_09.fasta	79999.1	1	3	3	3	0.000258	0.0371
HN-SMG-Mucus	HN-2	08.RAW (F013057)	Vimentin OS=Homo sapiens GN=VIM PE=1 SV=4	P08670	SwissProt_2012_09.fasta	53652.7	0.998	2	2	2	0.000172	0.0386
HN-SMG-Mucus	HN-2	08.RAW (F013057)	IgGFc-binding protein OS=Homo sapiens GN=FCGBP PE=1 SV=3	Q9Y6R7	SwissProt_2012_09.fasta	571983	1	7	9	9	0.000775	0.0196
HN-SMG-Mucus	HN-2	08.RAW (F013057)	Complement factor H OS=Homo sapiens GN=CFH PE=1 SV=4	P08603	SwissProt_2012_09.fasta	139096	1	2	2	2	0.000172	0.0236
HN-SMG-Mucus	HN-2	08.RAW (F013057)	N-acetyl-D-glucosamine kinase OS=Homo sapiens GN=NAGK PE=1 SV=4	Q9UJ70	SwissProt_2012_09.fasta	37377.1	0.998	2	2	2	0.000172	0.108
HN-SMG-Mucus	HN-2	08.RAW (F013057)	Mucin-5B OS=Homo sapiens GN=MUC5B PE=1 SV=3	Q9HC84	SwissProt_2012_09.fasta	596324	1	19	27	37	0.00318	0.0477
HN-SMG-Mucus	HN-2	08.RAW (F013057)	Protein DJ-1 OS=Homo sapiens GN=PARK7 PE=1 SV=2	Q99497	SwissProt_2012_09.fasta	19891.2	0.998	2	2	2	0.000172	0.164
HN-SMG-Mucus	HN-2	08.RAW (F013057)	Keratin, type II cytoskeletal 2 epidermal OS=Homo sapiens GN=KRT2 PE=1 SV=2	P35908	SwissProt_2012_09.fasta	65433.9	0.998	2	3	3	0.000258	0.135
HN-SMG-Mucus	HN-2	08.RAW (F013057)	Calnexin OS=Homo sapiens GN=CANX PE=1 SV=2	P27824	SwissProt_2012_09.fasta	67570.2	1	3	3	3	0.000258	0.0794
HN-SMG-Mucus	HN-2	08.RAW (F013057)	Arachidonate 15-lipoxygenase OS=Homo sapiens GN=ALOX15 PE=1 SV=3	P16050	SwissProt_2012_09.fasta	74805.9	0.998	2	2	3	0.000258	0.0634
HN-SMG-Mucus	HN-2	08.RAW (F013057)	Ceruloplasmin OS=Homo sapiens GN=CP PE=1 SV=1	P00450	SwissProt_2012_09.fasta	122208	0.998	2	3	3	0.000258	0.0357
HN-SMG-Mucus	HN-2	08.RAW (F013057)	Voltage-dependent anion-selective channel protein 1 OS=Homo sapiens GN=VDAC1 PE=1 SV=2	P21796	SwissProt_2012_09.fasta	30773.9	0.998	2	3	3	0.000258	0.0989
HN-SMG-Mucus	HN-2	08.RAW (F013057)	Keratin, type II cytoskeletal 6A OS=Homo sapiens GN=KRT6A PE=1 SV=3	P02538	SwissProt_2012_09.fasta	60046.4	1	6	6	6	0.000516	0.22
HN-SMG-Mucus	HN-2	08.RAW (F013057)	Keratin, type I cytoskeletal 14 OS=Homo sapiens GN=KRT14 PE=1 SV=4	P02533	SwissProt_2012_09.fasta	51562.5	0.998	2	2	2	0.000172	0.123
HN-SMG-Mucus	HN-2	08.RAW (F013057)	Glycerol-3-phosphate dehydrogenase, mitochondrial OS=Homo sapiens GN=GPD2 PE=1 SV=3	P43304	SwissProt_2012_09.fasta	80854.6	0.998	2	2	2	0.000172	0.0605
HN-SMG-Mucus	HN-2	08.RAW (F013057)	Catenin alpha-1 OS=Homo sapiens GN=CTNNA1 PE=1 SV=1	P35221	SwissProt_2012_09.fasta	100073	0.998	2	3	4	0.000344	0.0497
HN-SMG-Mucus	HN-2	08.RAW (F013057)	Lysozyme C OS=Homo sapiens GN=LYZ PE=1 SV=1	P61626	SwissProt_2012_09.fasta	16536.9	1	4	6	9	0.000775	0.351
HN-SMG-Mucus	HN-2	08.RAW (F013057)	Alpha-actinin-4 OS=Homo sapiens GN=ACTN4 PE=1 SV=2	O43707	SwissProt_2012_09.fasta	104857	0.998	2	2	2	0.000172	0.0362
HN-SMG-Mucus	HN-2	08.RAW (F013057)	Protein disulfide-isomerase A4 OS=Homo sapiens GN=PDIA4 PE=1 SV=2	P13667	SwissProt_2012_09.fasta	72934	0.998	2	2	2	0.000172	0.0636
HN-SMG-Mucus	HN-2	08.RAW (F013057)	Adenosylhomocysteinase OS=Homo sapiens GN=AHCY PE=1 SV=4	P23526	SwissProt_2012_09.fasta	47717.1	0.998	2	2	2	0.000172	0.0694
HN-SMG-Mucus	HN-2	08.RAW (F013057)	Keratin, type II cytoskeletal 5 OS=Homo sapiens GN=KRT5 PE=1 SV=3	P13647	SwissProt_2012_09.fasta	62379.6	1	15	15	17	0.00146	0.278
HN-SMG-Mucus	HN-2	08.RAW (F013057)	Keratin, type I cytoskeletal 13 OS=Homo sapiens GN=KRT13 PE=1 SV=4	P13646	SwissProt_2012_09.fasta	49589.3	1	4	4	4	0.000344	0.162
HN-SMG-Mucus	HN-2	08.RAW (F013057)	Myosin-9 OS=Homo sapiens GN=MYH9 PE=1 SV=4	P35579	SwissProt_2012_09.fasta	226538	0.999	2	3	3	0.000258	0.0204
HN-SMG-Mucus	HN-2	08.RAW (F013057)	Annexin A2 OS=Homo sapiens GN=ANXA2 PE=1 SV=2	P07355	SwissProt_2012_09.fasta	38606.1	1	5	7	8	0.000689	0.23
HN-SMG-Mucus	HN-2	08.RAW (F013057)	Keratin, type II cytoskeletal 4 OS=Homo sapiens GN=KRT4 PE=1 SV=4	P19013	SwissProt_2012_09.fasta	57286.1	1	6	7	7	0.000602	0.172
HN-SMG-Mucus	HN-2	08.RAW (F013057)	Keratin, type I cytoskeletal 15 OS=Homo sapiens GN=KRT15 PE=1 SV=3	P19012	SwissProt_2012_09.fasta	49212.9	1	3	3	3	0.000258	0.171
HN-SMG-Mucus	HN-2	08.RAW (F013057)	Clathrin heavy chain 1 OS=Homo sapiens GN=CLTC PE=1 SV=5	Q00610	SwissProt_2012_09.fasta	191619	1	4	4	4	0.000344	0.043
HN-SMG-Mucus	HN-2	08.RAW (F013057)	14-3-3 protein sigma OS=Homo sapiens GN=SFN PE=1 SV=1	P31947	SwissProt_2012_09.fasta	27774.8	0.998	2	2	2	0.000172	0.165
HN-SMG-Mucus	HN-2	08.RAW (F013057)	Periplakin OS=Homo sapiens GN=PPL PE=1 SV=4	O60437	SwissProt_2012_09.fasta	204747	0.998	2	2	2	0.000172	0.0251
HN-SMG-Mucus	HN-2	08.RAW (F013057)	BPI fold-containing family B member 1 OS=Homo sapiens GN=BPIFB1 PE=2 SV=1	Q8TDL5	SwissProt_2012_09.fasta	52443.8	1	13	19	47	0.00405	0.417
HN-SMG-Mucus	HN-2	08.RAW (F013057)	ATP synthase subunit beta, mitochondrial OS=Homo sapiens GN=ATP5B PE=1 SV=3	P06576	SwissProt_2012_09.fasta	56560.6	1	7	8	10	0.000861	0.244
HN-SMG-Mucus	HN-2	08.RAW (F013057)	Calreticulin OS=Homo sapiens GN=CALR PE=1 SV=1	P27797	SwissProt_2012_09.fasta	48142.9	1	3	3	3	0.000258	0.185
HN-SMG-Mucus	HN-2	08.RAW (F013057)	Retinal dehydrogenase 1 OS=Homo sapiens GN=ALDH1A1 PE=1 SV=2	P00352	SwissProt_2012_09.fasta	54862.8	1	4	4	5	0.00043	0.14
HN-SMG-Mucus	HN-2	08.RAW (F013057)	Calmodulin OS=Homo sapiens GN=CALM1 PE=1 SV=2	P62158	SwissProt_2012_09.fasta	16838	0.998	2	3	3	0.000258	0.201
HN-SMG-Mucus	HN-2	08.RAW (F013057)	Plectin OS=Homo sapiens GN=PLEC PE=1 SV=3	Q15149	SwissProt_2012_09.fasta	531784	1	4	4	4	0.000344	0.012
HN-SMG-Mucus	HN-2	08.RAW (F013057)	Filamin-A OS=Homo sapiens GN=FLNA PE=1 SV=4	P21333	SwissProt_2012_09.fasta	280729	1	4	4	4	0.000344	0.028
HN-SMG-Mucus	HN-2	08.RAW (F013057)	Ras GTPase-activating-like protein IQGAP1 OS=Homo sapiens GN=IQGAP1 PE=1 SV=1	P46940	SwissProt_2012_09.fasta	189259	0.999	2	2	2	0.000172	0.0211
HN-SMG-Mucus	HN-2	08.RAW (F013057)	Keratin, type II cytoskeletal 1 OS=Homo sapiens GN=KRT1 PE=1 SV=6	P04264	SwissProt_2012_09.fasta	66040.3	1	2	2	2	0.000172	0.0699
HN-SMG-Mucus	HN-2	08.RAW (F013057)	Hemoglobin subunit beta OS=Homo sapiens GN=HBB PE=1 SV=2	P68871	SwissProt_2012_09.fasta	15998	1	3	3	3	0.000258	0.211
HN-SMG-Mucus	HN-2	08.RAW (F013057)	ADP/ATP translocase 2 OS=Homo sapiens GN=SLC25A5 PE=1 SV=7	P05141	SwissProt_2012_09.fasta	32853.5	1	3	3	3	0.000258	0.0839
HN-SMG-Mucus	HN-2	08.RAW (F013057)	Peroxisomal multifunctional enzyme type 2 OS=Homo sapiens GN=HSD17B4 PE=1 SV=3	P51659	SwissProt_2012_09.fasta	79688.5	0.997	2	2	2	0.000172	0.072
HN-SMG-Mucus	HN-2	08.RAW (F013057)	Neuroblast differentiation-associated protein AHNAK OS=Homo sapiens GN=AHNAK PE=1 SV=2	Q09666	SwissProt_2012_09.fasta	629104	1	5	5	5	0.00043	0.0192
HN-SMG-Mucus	HN-2	08.RAW (F013057)	Gelsolin OS=Homo sapiens GN=GSN PE=1 SV=1	P06396	SwissProt_2012_09.fasta	85697.8	0.999	2	3	3	0.000258	0.0294
HN-SMG-Mucus	HN-2	08.RAW (F013057)	6-phosphogluconate dehydrogenase, decarboxylating OS=Homo sapiens GN=PGD PE=1 SV=3	P52209	SwissProt_2012_09.fasta	53141.9	0.995	2	2	2	0.000172	0.0828
HN-SMG-Mucus	HN-2	08.RAW (F013057)	Lactotransferrin OS=Homo sapiens GN=LTF PE=1 SV=6	P02788	SwissProt_2012_09.fasta	78182.3	1	10	13	19	0.00164	0.201
HN-SMG-Mucus	HN-2	08.RAW (F013057)	Vitamin D-binding protein OS=Homo sapiens GN=GC PE=1 SV=1	P02774	SwissProt_2012_09.fasta	52964.6	0.998	2	2	2	0.000172	0.0928
HN-SMG-Mucus	HN-2	08.RAW (F013057)	Ig alpha-1 chain C region OS=Homo sapiens GN=IGHA1 PE=1 SV=2	P01876	SwissProt_2012_09.fasta	37653.8	1	2	3	3	0.000258	0.085
HN-SMG-Mucus	HN-2	08.RAW (F013057)	Serum albumin OS=Homo sapiens GN=ALB PE=1 SV=2	P02768	SwissProt_2012_09.fasta	69366.9	1	8	12	43	0.0037	0.179
HN-SMG-Mucus	HN-2	08.RAW (F013057)	Ig gamma-1 chain C region OS=Homo sapiens GN=IGHG1 PE=1 SV=1	P01857	SwissProt_2012_09.fasta	36105	1	3	4	5	0.00043	0.185
HN-SMG-Mucus	HN-2	08.RAW (F013057)	Ezrin OS=Homo sapiens GN=EZR PE=1 SV=4	P15311	SwissProt_2012_09.fasta	69414.7	0.998	2	2	2	0.000172	0.058
HN-SMG-Mucus	HN-2	08.RAW (F013057)	Protein disulfide-isomerase OS=Homo sapiens GN=P4HB PE=1 SV=3	P07237	SwissProt_2012_09.fasta	57118.1	0.998	2	2	2	0.000172	0.0925
HN-SMG-Mucus	HN-2	08.RAW (F013057)	Polymeric immunoglobulin receptor OS=Homo sapiens GN=PIGR PE=1 SV=4	P01833	SwissProt_2012_09.fasta	83283.4	1	8	8	10	0.000861	0.17
HN-SMG-Mucus	HN-2	08.RAW (F013057)	Beta-2-glycoprotein 1 OS=Homo sapiens GN=APOH PE=1 SV=3	P02749	SwissProt_2012_09.fasta	38298.5	0.998	2	2	3	0.000258	0.11
HN-SMG-Mucus	HN-2	08.RAW (F013057)	Keratin, type II cytoskeletal 8 OS=Homo sapiens GN=KRT8 PE=1 SV=7	P05787	SwissProt_2012_09.fasta	53706.2	1	6	8	8	0.000689	0.151
HN-SMG-Mucus	HN-2	08.RAW (F013057)	Keratin, type I cytoskeletal 18 OS=Homo sapiens GN=KRT18 PE=1 SV=2	P05783	SwissProt_2012_09.fasta	48059	1	6	6	7	0.000602	0.228
HN-SMG-Mucus	HN-2	08.RAW (F013057)	Antileukoproteinase OS=Homo sapiens GN=SLPI PE=1 SV=2	P03973	SwissProt_2012_09.fasta	14326	0.999	2	2	2	0.000172	0.25
HN-SMG-Mucus	HN-2	08.RAW (F013057)	Neutral alpha-glucosidase AB OS=Homo sapiens GN=GANAB PE=1 SV=3	Q14697	SwissProt_2012_09.fasta	106876	0.995	2	2	2	0.000172	0.0318
HN-SMG-Mucus	HN-2	08.RAW (F013057)	78 kDa glucose-regulated protein OS=Homo sapiens GN=HSPA5 PE=1 SV=2	P11021	SwissProt_2012_09.fasta	72334.7	1	2	2	3	0.000258	0.0505
HN-SMG-Mucus	HN-2	08.RAW (F013057)	Rab GDP dissociation inhibitor beta OS=Homo sapiens GN=GDI2 PE=1 SV=2	P50395	SwissProt_2012_09.fasta	50665.5	0.998	2	2	2	0.000172	0.0809
HN-SMG-Mucus	HN-2	08.RAW (F013057)	Actin-related protein 3 OS=Homo sapiens GN=ACTR3 PE=1 SV=3	P61158	SwissProt_2012_09.fasta	47371.9	0.998	2	2	2	0.000172	0.124
HN-SMG-Mucus	HN-2	08.RAW (F013057)	Prolactin-inducible protein OS=Homo sapiens GN=PIP PE=1 SV=1	P12273	SwissProt_2012_09.fasta	16573.1	1	4	5	6	0.000516	0.397
HN-SMG-Mucus	HN-2	08.RAW (F013057)	Phosphoglycerate mutase 1 OS=Homo sapiens GN=PGAM1 PE=1 SV=2	P18669	SwissProt_2012_09.fasta	28804.8	0.998	2	3	3	0.000258	0.189
HN-SMG-Mucus	HN-2	08.RAW (F013057)	Heterogeneous nuclear ribonucleoproteins A2/B1 OS=Homo sapiens GN=HNRNPA2B1 PE=1 SV=2	P22626	SwissProt_2012_09.fasta	37430.3	1	3	3	3	0.000258	0.113
HN-SMG-Mucus	HN-2	08.RAW (F013057)	Transketolase OS=Homo sapiens GN=TKT PE=1 SV=3	P29401	SwissProt_2012_09.fasta	67879.4	0.999	2	2	2	0.000172	0.0642
HN-SMG-Mucus	HN-2	08.RAW (F013057)	Desmoplakin OS=Homo sapiens GN=DSP PE=1 SV=3	P15924	SwissProt_2012_09.fasta	331781	1	3	3	3	0.000258	0.0202
HN-SMG-Mucus	HN-2	08.RAW (F013057)	Phosphoglycerate kinase 1 OS=Homo sapiens GN=PGK1 PE=1 SV=3	P00558	SwissProt_2012_09.fasta	44615.3	0.998	2	2	2	0.000172	0.0839
HN-SMG-Mucus	HN-2	08.RAW (F013057)	Filamin-B OS=Homo sapiens GN=FLNB PE=1 SV=2	O75369	SwissProt_2012_09.fasta	278159	1	7	7	7	0.000602	0.0546
HN-SMG-Mucus	HN-2	08.RAW (F013057)	Actin, cytoplasmic 2 OS=Homo sapiens GN=ACTG1 PE=1 SV=1	P63261	SwissProt_2012_09.fasta	41793.9	1	3	4	4	0.000344	0.101
HN-SMG-Mucus	HN-2	08.RAW (F013057)	Nucleobindin-2 OS=Homo sapiens GN=NUCB2 PE=1 SV=2	P80303	SwissProt_2012_09.fasta	50197.3	0.998	2	2	2	0.000172	0.1
HN-SMG-Mucus	HN-2	08.RAW (F013057)	Keratin, type I cytoskeletal 19 OS=Homo sapiens GN=KRT19 PE=1 SV=4	P08727	SwissProt_2012_09.fasta	44107.1	1	10	12	16	0.00138	0.303
HN-SMG-Mucus	HN-2	08.RAW (F013057)	Sodium/potassium-transporting ATPase subunit alpha-1 OS=Homo sapiens GN=ATP1A1 PE=1 SV=1	P05023	SwissProt_2012_09.fasta	112900	0.998	2	2	2	0.000172	0.0264
HN-SMG-Mucus	HN-2	08.RAW (F013057)	Guanine nucleotide-binding protein subunit beta-2-like 1 OS=Homo sapiens GN=GNB2L1 PE=1 SV=3	P63244	SwissProt_2012_09.fasta	35077	0.998	2	2	2	0.000172	0.0789
HN-SMG-Mucus	HN-2	08.RAW (F013057)	Deleted in malignant brain tumors 1 protein OS=Homo sapiens GN=DMBT1 PE=1 SV=2	Q9UGM3	SwissProt_2012_09.fasta	260726	1	6	6	6	0.000516	0.0344
HN-SMG-Mucus	HN-2	09.RAW (F013058)	Vitamin D-binding protein OS=Homo sapiens GN=GC PE=1 SV=1	P02774	SwissProt_2012_09.fasta	52964.6	0.998	2	2	2	0.000202	0.0886
HN-SMG-Mucus	HN-2	09.RAW (F013058)	Annexin A2 OS=Homo sapiens GN=ANXA2 PE=1 SV=2	P07355	SwissProt_2012_09.fasta	38606.1	1	4	4	6	0.000605	0.156
HN-SMG-Mucus	HN-2	09.RAW (F013058)	Serum albumin OS=Homo sapiens GN=ALB PE=1 SV=2	P02768	SwissProt_2012_09.fasta	69366.9	1	4	6	8	0.000807	0.113
HN-SMG-Mucus	HN-2	09.RAW (F013058)	Hemoglobin subunit beta OS=Homo sapiens GN=HBB PE=1 SV=2	P68871	SwissProt_2012_09.fasta	15998	0.998	2	2	2	0.000202	0.15
HN-SMG-Mucus	HN-2	09.RAW (F013058)	40S ribosomal protein S20 OS=Homo sapiens GN=RPS20 PE=1 SV=1	P60866	SwissProt_2012_09.fasta	13373	0.998	2	2	2	0.000202	0.193
HN-SMG-Mucus	HN-2	09.RAW (F013058)	Keratin, type II cytoskeletal 5 OS=Homo sapiens GN=KRT5 PE=1 SV=3	P13647	SwissProt_2012_09.fasta	62379.6	0.998	2	2	2	0.000202	0.0542
HN-SMG-Mucus	HN-2	09.RAW (F013058)	Actin, cytoplasmic 2 OS=Homo sapiens GN=ACTG1 PE=1 SV=1	P63261	SwissProt_2012_09.fasta	41793.9	0.998	2	2	2	0.000202	0.0773
HN-SMG-Mucus	HN-2	09.RAW (F013058)	Prolactin-inducible protein OS=Homo sapiens GN=PIP PE=1 SV=1	P12273	SwissProt_2012_09.fasta	16573.1	0.998	2	2	5	0.000504	0.233
HN-SMG-Mucus	HN-2	09.RAW (F013058)	Mucin-5B OS=Homo sapiens GN=MUC5B PE=1 SV=3	Q9HC84	SwissProt_2012_09.fasta	596324	1	14	16	23	0.00232	0.0427
HN-SMG-Mucus	HN-2	09.RAW (F013058)	Polymeric immunoglobulin receptor OS=Homo sapiens GN=PIGR PE=1 SV=4	P01833	SwissProt_2012_09.fasta	83283.4	0.998	2	3	3	0.000303	0.051
HN-SMG-Mucus	HN-2	09.RAW (F013058)	Retinal dehydrogenase 1 OS=Homo sapiens GN=ALDH1A1 PE=1 SV=2	P00352	SwissProt_2012_09.fasta	54862.8	0.998	2	2	3	0.000303	0.0778
HN-SMG-Mucus	HN-2	09.RAW (F013058)	Beta-2-glycoprotein 1 OS=Homo sapiens GN=APOH PE=1 SV=3	P02749	SwissProt_2012_09.fasta	38298.5	0.998	2	2	2	0.000202	0.11
HN-SMG-Mucus	HN-2	09.RAW (F013058)	BPI fold-containing family B member 1 OS=Homo sapiens GN=BPIFB1 PE=2 SV=1	Q8TDL5	SwissProt_2012_09.fasta	52443.8	1	7	8	11	0.00111	0.2
HN-SMG-Mucus	HN-2	09.RAW (F013058)	Deleted in malignant brain tumors 1 protein OS=Homo sapiens GN=DMBT1 PE=1 SV=2	Q9UGM3	SwissProt_2012_09.fasta	260726	0.998	2	2	2	0.000202	0.0145
HN-SMG-Mucus	HN-2	09.RAW (F013058)	Keratin, type II cytoskeletal 8 OS=Homo sapiens GN=KRT8 PE=1 SV=7	P05787	SwissProt_2012_09.fasta	53706.2	1	3	3	3	0.000303	0.0932
HN-SMG-Mucus	HN-2	09.RAW (F013058)	Calmodulin OS=Homo sapiens GN=CALM1 PE=1 SV=2	P62158	SwissProt_2012_09.fasta	16838	0.996	2	2	2	0.000202	0.201
HN-SMG-Mucus	HN-2	09.RAW (F013058)	ATP synthase subunit beta, mitochondrial OS=Homo sapiens GN=ATP5B PE=1 SV=3	P06576	SwissProt_2012_09.fasta	56560.6	1	2	2	2	0.000202	0.0699
HN-SMG-Mucus	HN-2	09.RAW (F013058)	Keratin, type I cytoskeletal 19 OS=Homo sapiens GN=KRT19 PE=1 SV=4	P08727	SwissProt_2012_09.fasta	44107.1	1	6	6	7	0.000706	0.22
HN-SMG-Mucus	HN-2	09.RAW (F013058)	Lactotransferrin OS=Homo sapiens GN=LTF PE=1 SV=6	P02788	SwissProt_2012_09.fasta	78182.3	1	5	5	6	0.000605	0.11
HN-SMG-Mucus	HN-2	10.RAW (F013060)	Moesin OS=Homo sapiens GN=MSN PE=1 SV=3	P26038	SwissProt_2012_09.fasta	67821.8	0.998	2	2	2	0.000167	0.0295
HN-SMG-Mucus	HN-2	10.RAW (F013060)	40S ribosomal protein S2 OS=Homo sapiens GN=RPS2 PE=1 SV=2	P15880	SwissProt_2012_09.fasta	31325.2	0.997	2	2	2	0.000167	0.0683
HN-SMG-Mucus	HN-2	10.RAW (F013060)	Calpain-2 catalytic subunit OS=Homo sapiens GN=CAPN2 PE=1 SV=6	P17655	SwissProt_2012_09.fasta	79999.1	0.998	2	2	2	0.000167	0.0429
HN-SMG-Mucus	HN-2	10.RAW (F013060)	Fibrinogen beta chain OS=Homo sapiens GN=FGB PE=1 SV=2	P02675	SwissProt_2012_09.fasta	55928.6	0.998	2	3	3	0.000251	0.0794
HN-SMG-Mucus	HN-2	10.RAW (F013060)	Mucin-5AC (Fragments) OS=Homo sapiens GN=MUC5AC PE=1 SV=3	P98088	SwissProt_2012_09.fasta	526585	1	3	4	4	0.000335	0.00954
HN-SMG-Mucus	HN-2	10.RAW (F013060)	Apolipoprotein A-I OS=Homo sapiens GN=APOA1 PE=1 SV=1	P02647	SwissProt_2012_09.fasta	30778.5	1	4	7	7	0.000586	0.191
HN-SMG-Mucus	HN-2	10.RAW (F013060)	Glutathione reductase, mitochondrial OS=Homo sapiens GN=GSR PE=1 SV=2	P00390	SwissProt_2012_09.fasta	56257.4	0.999	2	2	2	0.000167	0.0594
HN-SMG-Mucus	HN-2	10.RAW (F013060)	Aldehyde dehydrogenase, dimeric NADP-preferring OS=Homo sapiens GN=ALDH3A1 PE=1 SV=3	P30838	SwissProt_2012_09.fasta	50395.7	1	2	2	2	0.000167	0.0574
HN-SMG-Mucus	HN-2	10.RAW (F013060)	Eukaryotic initiation factor 4A-I OS=Homo sapiens GN=EIF4A1 PE=1 SV=1	P60842	SwissProt_2012_09.fasta	46155.3	0.998	2	2	2	0.000167	0.0567
HN-SMG-Mucus	HN-2	10.RAW (F013060)	Plectin OS=Homo sapiens GN=PLEC PE=1 SV=3	Q15149	SwissProt_2012_09.fasta	531784	1	6	6	6	0.000502	0.0137
HN-SMG-Mucus	HN-2	10.RAW (F013060)	Protein S100-A2 OS=Homo sapiens GN=S100A2 PE=1 SV=3	P29034	SwissProt_2012_09.fasta	11116.8	0.998	2	2	2	0.000167	0.173
HN-SMG-Mucus	HN-2	10.RAW (F013060)	Nucleophosmin OS=Homo sapiens GN=NPM1 PE=1 SV=2	P06748	SwissProt_2012_09.fasta	32575.5	0.999	2	2	2	0.000167	0.126
HN-SMG-Mucus	HN-2	10.RAW (F013060)	Myosin-14 OS=Homo sapiens GN=MYH14 PE=1 SV=2	Q7Z406	SwissProt_2012_09.fasta	227873	0.998	2	2	2	0.000167	0.0256
HN-SMG-Mucus	HN-2	10.RAW (F013060)	ATP synthase subunit beta, mitochondrial OS=Homo sapiens GN=ATP5B PE=1 SV=3	P06576	SwissProt_2012_09.fasta	56560.6	0.998	2	2	2	0.000167	0.0567
HN-SMG-Mucus	HN-2	10.RAW (F013060)	60S ribosomal protein L4 OS=Homo sapiens GN=RPL4 PE=1 SV=5	P36578	SwissProt_2012_09.fasta	47699.1	1	3	3	3	0.000251	0.0796
HN-SMG-Mucus	HN-2	10.RAW (F013060)	Endoplasmin OS=Homo sapiens GN=HSP90B1 PE=1 SV=1	P14625	SwissProt_2012_09.fasta	92471.7	1	3	3	3	0.000251	0.0448
HN-SMG-Mucus	HN-2	10.RAW (F013060)	Tubulin alpha-1B chain OS=Homo sapiens GN=TUBA1B PE=1 SV=1	P68363	SwissProt_2012_09.fasta	50151.7	1	3	3	3	0.000251	0.0931
HN-SMG-Mucus	HN-2	10.RAW (F013060)	Pyruvate kinase isozymes M1/M2 OS=Homo sapiens GN=PKM PE=1 SV=4	P14618	SwissProt_2012_09.fasta	57937.5	0.998	2	4	4	0.000335	0.0452
HN-SMG-Mucus	HN-2	10.RAW (F013060)	Proteasome subunit alpha type-1 OS=Homo sapiens GN=PSMA1 PE=1 SV=1	P25786	SwissProt_2012_09.fasta	29556	0.998	2	3	3	0.000251	0.0837
HN-SMG-Mucus	HN-2	10.RAW (F013060)	Keratin, type I cytoskeletal 17 OS=Homo sapiens GN=KRT17 PE=1 SV=2	Q04695	SwissProt_2012_09.fasta	48106.7	1	4	6	6	0.000502	0.109
HN-SMG-Mucus	HN-2	10.RAW (F013060)	Complement C3 OS=Homo sapiens GN=C3 PE=1 SV=2	P01024	SwissProt_2012_09.fasta	187149	1	7	8	8	0.00067	0.0547
HN-SMG-Mucus	HN-2	10.RAW (F013060)	Alpha-2-macroglobulin OS=Homo sapiens GN=A2M PE=1 SV=3	P01023	SwissProt_2012_09.fasta	163290	1	4	4	4	0.000335	0.0353
HN-SMG-Mucus	HN-2	10.RAW (F013060)	Alcohol dehydrogenase class 4 mu/sigma chain OS=Homo sapiens GN=ADH7 PE=1 SV=2	P40394	SwissProt_2012_09.fasta	41481.4	0.999	2	2	2	0.000167	0.0907
HN-SMG-Mucus	HN-2	10.RAW (F013060)	Elongation factor 1-gamma OS=Homo sapiens GN=EEF1G PE=1 SV=3	P26641	SwissProt_2012_09.fasta	50119.4	1	3	3	3	0.000251	0.087
HN-SMG-Mucus	HN-2	10.RAW (F013060)	60S ribosomal protein L5 OS=Homo sapiens GN=RPL5 PE=1 SV=3	P46777	SwissProt_2012_09.fasta	34363.5	1	2	2	2	0.000167	0.0741
HN-SMG-Mucus	HN-2	10.RAW (F013060)	Protein disulfide-isomerase A3 OS=Homo sapiens GN=PDIA3 PE=1 SV=4	P30101	SwissProt_2012_09.fasta	56784.6	0.998	2	3	3	0.000251	0.0713
HN-SMG-Mucus	HN-2	10.RAW (F013060)	Annexin A1 OS=Homo sapiens GN=ANXA1 PE=1 SV=2	P04083	SwissProt_2012_09.fasta	38715.9	1	5	5	5	0.000418	0.225
HN-SMG-Mucus	HN-2	10.RAW (F013060)	ATP synthase subunit alpha, mitochondrial OS=Homo sapiens GN=ATP5A1 PE=1 SV=1	P25705	SwissProt_2012_09.fasta	59752.1	0.998	2	2	2	0.000167	0.0416
HN-SMG-Mucus	HN-2	10.RAW (F013060)	ATP-dependent RNA helicase A OS=Homo sapiens GN=DHX9 PE=1 SV=4	Q08211	SwissProt_2012_09.fasta	140962	0.998	2	2	2	0.000167	0.0189
HN-SMG-Mucus	HN-2	10.RAW (F013060)	Prelamin-A/C OS=Homo sapiens GN=LMNA PE=1 SV=1	P02545	SwissProt_2012_09.fasta	74140.7	1	6	6	7	0.000586	0.114
HN-SMG-Mucus	HN-2	10.RAW (F013060)	Stress-70 protein, mitochondrial OS=Homo sapiens GN=HSPA9 PE=1 SV=2	P38646	SwissProt_2012_09.fasta	73681.3	1	3	4	4	0.000335	0.0781
HN-SMG-Mucus	HN-2	10.RAW (F013060)	Mucin-5B OS=Homo sapiens GN=MUC5B PE=1 SV=3	Q9HC84	SwissProt_2012_09.fasta	596324	1	20	22	26	0.00218	0.0554
HN-SMG-Mucus	HN-2	10.RAW (F013060)	Keratin, type II cytoskeletal 2 epidermal OS=Homo sapiens GN=KRT2 PE=1 SV=2	P35908	SwissProt_2012_09.fasta	65433.9	1	3	3	4	0.000335	0.124
HN-SMG-Mucus	HN-2	10.RAW (F013060)	Calnexin OS=Homo sapiens GN=CANX PE=1 SV=2	P27824	SwissProt_2012_09.fasta	67570.2	0.998	2	2	4	0.000335	0.0422
HN-SMG-Mucus	HN-2	10.RAW (F013060)	60S ribosomal protein L19 OS=Homo sapiens GN=RPL19 PE=1 SV=1	P84098	SwissProt_2012_09.fasta	23467.4	0.998	2	2	2	0.000167	0.051
HN-SMG-Mucus	HN-2	10.RAW (F013060)	Solute carrier family 12 member 2 OS=Homo sapiens GN=SLC12A2 PE=1 SV=1	P55011	SwissProt_2012_09.fasta	131452	0.998	2	2	2	0.000167	0.0173
HN-SMG-Mucus	HN-2	10.RAW (F013060)	Galectin-7 OS=Homo sapiens GN=LGALS7 PE=1 SV=2	P47929	SwissProt_2012_09.fasta	15074.7	0.998	2	3	3	0.000251	0.265
HN-SMG-Mucus	HN-2	10.RAW (F013060)	Complement factor B OS=Homo sapiens GN=CFB PE=1 SV=2	P00751	SwissProt_2012_09.fasta	85533.2	0.998	2	2	2	0.000167	0.0288
HN-SMG-Mucus	HN-2	10.RAW (F013060)	Keratin, type II cytoskeletal 6A OS=Homo sapiens GN=KRT6A PE=1 SV=3	P02538	SwissProt_2012_09.fasta	60046.4	1	3	3	3	0.000251	0.147
HN-SMG-Mucus	HN-2	10.RAW (F013060)	Haptoglobin OS=Homo sapiens GN=HP PE=1 SV=1	P00738	SwissProt_2012_09.fasta	45204.9	1	4	4	4	0.000335	0.101
HN-SMG-Mucus	HN-2	10.RAW (F013060)	High mobility group protein B1 OS=Homo sapiens GN=HMGB1 PE=1 SV=3	P09429	SwissProt_2012_09.fasta	24894.7	1	3	3	3	0.000251	0.107
HN-SMG-Mucus	HN-2	10.RAW (F013060)	Aconitate hydratase, mitochondrial OS=Homo sapiens GN=ACO2 PE=1 SV=2	Q99798	SwissProt_2012_09.fasta	85428	1	3	5	5	0.000418	0.0782
HN-SMG-Mucus	HN-2	10.RAW (F013060)	Aldo-keto reductase family 1 member C1 OS=Homo sapiens GN=AKR1C1 PE=1 SV=1	Q04828	SwissProt_2012_09.fasta	36789.1	1	4	4	4	0.000335	0.223
HN-SMG-Mucus	HN-2	10.RAW (F013060)	Protein disulfide-isomerase A4 OS=Homo sapiens GN=PDIA4 PE=1 SV=2	P13667	SwissProt_2012_09.fasta	72934	0.998	2	2	3	0.000251	0.031
HN-SMG-Mucus	HN-2	10.RAW (F013060)	Eukaryotic translation initiation factor 5A-1 OS=Homo sapiens GN=EIF5A PE=1 SV=2	P63241,Q9GZV4	SwissProt_2012_09.fasta	16832.7	0.998	2	2	2	0.000167	0.195
HN-SMG-Mucus	HN-2	10.RAW (F013060)	10 kDa heat shock protein, mitochondrial OS=Homo sapiens GN=HSPE1 PE=1 SV=2	P61604	SwissProt_2012_09.fasta	10931.8	0.998	2	2	2	0.000167	0.235
HN-SMG-Mucus	HN-2	10.RAW (F013060)	Galectin-3-binding protein OS=Homo sapiens GN=LGALS3BP PE=1 SV=1	Q08380	SwissProt_2012_09.fasta	65332.1	0.998	2	2	2	0.000167	0.0359
HN-SMG-Mucus	HN-2	10.RAW (F013060)	Zinc-alpha-2-glycoprotein OS=Homo sapiens GN=AZGP1 PE=1 SV=2	P25311	SwissProt_2012_09.fasta	34258.6	1	2	3	4	0.000335	0.0772
HN-SMG-Mucus	HN-2	10.RAW (F013060)	Keratin, type II cytoskeletal 5 OS=Homo sapiens GN=KRT5 PE=1 SV=3	P13647	SwissProt_2012_09.fasta	62379.6	1	10	11	12	0.001	0.161
HN-SMG-Mucus	HN-2	10.RAW (F013060)	Keratin, type I cytoskeletal 13 OS=Homo sapiens GN=KRT13 PE=1 SV=4	P13646	SwissProt_2012_09.fasta	49589.3	1	4	4	6	0.000502	0.0895
HN-SMG-Mucus	HN-2	10.RAW (F013060)	Keratin, type I cytoskeletal 10 OS=Homo sapiens GN=KRT10 PE=1 SV=6	P13645	SwissProt_2012_09.fasta	58828.8	0.998	2	2	2	0.000167	0.0719
HN-SMG-Mucus	HN-2	10.RAW (F013060)	Myosin-9 OS=Homo sapiens GN=MYH9 PE=1 SV=4	P35579	SwissProt_2012_09.fasta	226538	1	10	10	12	0.001	0.0541
HN-SMG-Mucus	HN-2	10.RAW (F013060)	Annexin A2 OS=Homo sapiens GN=ANXA2 PE=1 SV=2	P07355	SwissProt_2012_09.fasta	38606.1	1	6	6	7	0.000586	0.189
HN-SMG-Mucus	HN-2	10.RAW (F013060)	Isocitrate dehydrogenase [NADP] cytoplasmic OS=Homo sapiens GN=IDH1 PE=1 SV=2	O75874	SwissProt_2012_09.fasta	46660.5	0.998	2	2	2	0.000167	0.058
HN-SMG-Mucus	HN-2	10.RAW (F013060)	Keratin, type II cytoskeletal 4 OS=Homo sapiens GN=KRT4 PE=1 SV=4	P19013	SwissProt_2012_09.fasta	57286.1	1	4	4	4	0.000335	0.0824
HN-SMG-Mucus	HN-2	10.RAW (F013060)	Clathrin heavy chain 1 OS=Homo sapiens GN=CLTC PE=1 SV=5	Q00610	SwissProt_2012_09.fasta	191619	1	7	7	7	0.000586	0.0555
HN-SMG-Mucus	HN-2	10.RAW (F013060)	Heat shock protein HSP 90-beta OS=Homo sapiens GN=HSP90AB1 PE=1 SV=4	P08238	SwissProt_2012_09.fasta	83267.3	0.998	2	2	2	0.000167	0.0276
HN-SMG-Mucus	HN-2	10.RAW (F013060)	60S ribosomal protein L12 OS=Homo sapiens GN=RPL12 PE=1 SV=1	P30050	SwissProt_2012_09.fasta	17819.1	0.998	2	2	3	0.000251	0.206
HN-SMG-Mucus	HN-2	10.RAW (F013060)	14-3-3 protein zeta/delta OS=Homo sapiens GN=YWHAZ PE=1 SV=1	P63104	SwissProt_2012_09.fasta	27745.9	1	3	4	4	0.000335	0.155
HN-SMG-Mucus	HN-2	10.RAW (F013060)	Clusterin OS=Homo sapiens GN=CLU PE=1 SV=1	P10909	SwissProt_2012_09.fasta	52495	0.998	2	3	3	0.000251	0.0267
HN-SMG-Mucus	HN-2	10.RAW (F013060)	Flavin reductase (NADPH) OS=Homo sapiens GN=BLVRB PE=1 SV=3	P30043	SwissProt_2012_09.fasta	22118.7	0.998	2	2	2	0.000167	0.165
HN-SMG-Mucus	HN-2	10.RAW (F013060)	Cytochrome b-c1 complex subunit 1, mitochondrial OS=Homo sapiens GN=UQCRC1 PE=1 SV=3	P31930	SwissProt_2012_09.fasta	52645.9	0.998	2	2	2	0.000167	0.0646
HN-SMG-Mucus	HN-2	10.RAW (F013060)	Keratin, type I cytoskeletal 9 OS=Homo sapiens GN=KRT9 PE=1 SV=3	P35527	SwissProt_2012_09.fasta	62065.9	0.998	2	3	3	0.000251	0.0417
HN-SMG-Mucus	HN-2	10.RAW (F013060)	Elongation factor 1-alpha 1 OS=Homo sapiens GN=EEF1A1 PE=1 SV=1	P68104,Q5VTE0	SwissProt_2012_09.fasta	50141.2	1	2	2	4	0.000335	0.0823
HN-SMG-Mucus	HN-2	10.RAW (F013060)	Histone H4 OS=Homo sapiens GN=HIST1H4A PE=1 SV=2	P62805	SwissProt_2012_09.fasta	11367.7	0.999	2	3	3	0.000251	0.136
HN-SMG-Mucus	HN-2	10.RAW (F013060)	NADH-cytochrome b5 reductase 3 OS=Homo sapiens GN=CYB5R3 PE=1 SV=3	P00387	SwissProt_2012_09.fasta	34236.3	0.998	2	2	2	0.000167	0.13
HN-SMG-Mucus	HN-2	10.RAW (F013060)	BPI fold-containing family B member 1 OS=Homo sapiens GN=BPIFB1 PE=2 SV=1	Q8TDL5	SwissProt_2012_09.fasta	52443.8	1	7	10	21	0.00176	0.223
HN-SMG-Mucus	HN-2	10.RAW (F013060)	Calreticulin OS=Homo sapiens GN=CALR PE=1 SV=1	P27797	SwissProt_2012_09.fasta	48142.9	1	4	5	5	0.000418	0.146
HN-SMG-Mucus	HN-2	10.RAW (F013060)	Tropomyosin alpha-3 chain OS=Homo sapiens GN=TPM3 PE=1 SV=1	P06753	SwissProt_2012_09.fasta	32820.2	0.997	2	2	2	0.000167	0.0634
HN-SMG-Mucus	HN-2	10.RAW (F013060)	Elongation factor 2 OS=Homo sapiens GN=EEF2 PE=1 SV=4	P13639	SwissProt_2012_09.fasta	95340.1	1	3	4	4	0.000335	0.0676
HN-SMG-Mucus	HN-2	10.RAW (F013060)	Retinal dehydrogenase 1 OS=Homo sapiens GN=ALDH1A1 PE=1 SV=2	P00352	SwissProt_2012_09.fasta	54862.8	1	4	4	4	0.000335	0.136
HN-SMG-Mucus	HN-2	10.RAW (F013060)	Alpha-enolase OS=Homo sapiens GN=ENO1 PE=1 SV=2	P06733	SwissProt_2012_09.fasta	47170.2	0.998	2	3	4	0.000335	0.0853
HN-SMG-Mucus	HN-2	10.RAW (F013060)	Calmodulin OS=Homo sapiens GN=CALM1 PE=1 SV=2	P62158	SwissProt_2012_09.fasta	16838	0.998	2	2	2	0.000167	0.101
HN-SMG-Mucus	HN-2	10.RAW (F013060)	Major vault protein OS=Homo sapiens GN=MVP PE=1 SV=4	Q14764	SwissProt_2012_09.fasta	99326	0.998	2	2	2	0.000167	0.0325
HN-SMG-Mucus	HN-2	10.RAW (F013060)	Protein S100-A9 OS=Homo sapiens GN=S100A9 PE=1 SV=1	P06702	SwissProt_2012_09.fasta	13242.3	0.998	2	2	3	0.000251	0.246
HN-SMG-Mucus	HN-2	10.RAW (F013060)	Dolichyl-diphosphooligosaccharide--protein glycosyltransferase subunit STT3A OS=Homo sapiens GN=STT3A PE=1 SV=2	P46977	SwissProt_2012_09.fasta	80532.8	0.998	2	2	2	0.000167	0.0326
HN-SMG-Mucus	HN-2	10.RAW (F013060)	Filamin-A OS=Homo sapiens GN=FLNA PE=1 SV=4	P21333	SwissProt_2012_09.fasta	280729	1	2	2	2	0.000167	0.0155
HN-SMG-Mucus	HN-2	10.RAW (F013060)	Spectrin alpha chain, non-erythrocytic 1 OS=Homo sapiens GN=SPTAN1 PE=1 SV=3	Q13813	SwissProt_2012_09.fasta	284543	1	3	3	3	0.000251	0.0129
HN-SMG-Mucus	HN-2	10.RAW (F013060)	Ras GTPase-activating-like protein IQGAP1 OS=Homo sapiens GN=IQGAP1 PE=1 SV=1	P46940	SwissProt_2012_09.fasta	189259	0.998	2	2	2	0.000167	0.0223
HN-SMG-Mucus	HN-2	10.RAW (F013060)	Keratin, type II cytoskeletal 1 OS=Homo sapiens GN=KRT1 PE=1 SV=6	P04264	SwissProt_2012_09.fasta	66040.3	0.999	2	2	2	0.000167	0.0947
HN-SMG-Mucus	HN-2	10.RAW (F013060)	Hemoglobin subunit beta OS=Homo sapiens GN=HBB PE=1 SV=2	P68871	SwissProt_2012_09.fasta	15998	1	4	4	4	0.000335	0.313
HN-SMG-Mucus	HN-2	10.RAW (F013060)	Keratin, type I cytoskeletal 14 OS=Homo sapiens GN=KRT14 PE=1 SV=4	P02533	SwissProt_2012_09.fasta	51562.5	1	4	4	4	0.000335	0.172
HN-SMG-Mucus	HN-2	10.RAW (F013060)	Heat shock protein HSP 90-alpha OS=Homo sapiens GN=HSP90AA1 PE=1 SV=5	P07900	SwissProt_2012_09.fasta	84663.2	0.998	2	2	2	0.000167	0.0342
HN-SMG-Mucus	HN-2	10.RAW (F013060)	60S ribosomal protein L7a OS=Homo sapiens GN=RPL7A PE=1 SV=2	P62424	SwissProt_2012_09.fasta	29996.3	0.999	2	2	2	0.000167	0.102
HN-SMG-Mucus	HN-2	10.RAW (F013060)	Neuroblast differentiation-associated protein AHNAK OS=Homo sapiens GN=AHNAK PE=1 SV=2	Q09666	SwissProt_2012_09.fasta	629104	0.998	3	3	3	0.000251	0.00407
HN-SMG-Mucus	HN-2	10.RAW (F013060)	Gelsolin OS=Homo sapiens GN=GSN PE=1 SV=1	P06396	SwissProt_2012_09.fasta	85697.8	1	3	3	3	0.000251	0.0422
HN-SMG-Mucus	HN-2	10.RAW (F013060)	Lactotransferrin OS=Homo sapiens GN=LTF PE=1 SV=6	P02788	SwissProt_2012_09.fasta	78182.3	1	15	21	29	0.00243	0.263
HN-SMG-Mucus	HN-2	10.RAW (F013060)	Serotransferrin OS=Homo sapiens GN=TF PE=1 SV=3	P02787	SwissProt_2012_09.fasta	77064.3	1	5	5	6	0.000502	0.0845
HN-SMG-Mucus	HN-2	10.RAW (F013060)	X-ray repair cross-complementing protein 5 OS=Homo sapiens GN=XRCC5 PE=1 SV=3	P13010	SwissProt_2012_09.fasta	82707.1	0.999	2	2	2	0.000167	0.0369
HN-SMG-Mucus	HN-2	10.RAW (F013060)	Serum albumin OS=Homo sapiens GN=ALB PE=1 SV=2	P02768	SwissProt_2012_09.fasta	69366.9	1	11	14	28	0.00234	0.268
HN-SMG-Mucus	HN-2	10.RAW (F013060)	Ig gamma-1 chain C region OS=Homo sapiens GN=IGHG1 PE=1 SV=1	P01857	SwissProt_2012_09.fasta	36105	0.998	2	3	5	0.000418	0.121
HN-SMG-Mucus	HN-2	10.RAW (F013060)	Protein disulfide-isomerase OS=Homo sapiens GN=P4HB PE=1 SV=3	P07237	SwissProt_2012_09.fasta	57118.1	1	5	6	6	0.000502	0.132
HN-SMG-Mucus	HN-2	10.RAW (F013060)	60 kDa heat shock protein, mitochondrial OS=Homo sapiens GN=HSPD1 PE=1 SV=2	P10809	SwissProt_2012_09.fasta	61055.7	0.998	2	2	2	0.000167	0.0297
HN-SMG-Mucus	HN-2	10.RAW (F013060)	Ig kappa chain C region OS=Homo sapiens GN=IGKC PE=1 SV=1	P01834	SwissProt_2012_09.fasta	11608.6	0.998	2	3	3	0.000251	0.16
HN-SMG-Mucus	HN-2	10.RAW (F013060)	60S ribosomal protein L3 OS=Homo sapiens GN=RPL3 PE=1 SV=2	P39023	SwissProt_2012_09.fasta	46109.5	1	3	3	4	0.000335	0.072
HN-SMG-Mucus	HN-2	10.RAW (F013060)	Transcobalamin-1 OS=Homo sapiens GN=TCN1 PE=1 SV=2	P20061	SwissProt_2012_09.fasta	48207.7	0.998	2	2	2	0.000167	0.0785
HN-SMG-Mucus	HN-2	10.RAW (F013060)	Heat shock 70 kDa protein 1A/1B OS=Homo sapiens GN=HSPA1A PE=1 SV=5	P08107	SwissProt_2012_09.fasta	70054	1	7	8	8	0.00067	0.123
HN-SMG-Mucus	HN-2	10.RAW (F013060)	Alpha-1-antichymotrypsin OS=Homo sapiens GN=SERPINA3 PE=1 SV=2	P01011	SwissProt_2012_09.fasta	47653	0.998	2	4	4	0.000335	0.052
HN-SMG-Mucus	HN-2	10.RAW (F013060)	Antileukoproteinase OS=Homo sapiens GN=SLPI PE=1 SV=2	P03973	SwissProt_2012_09.fasta	14326	1	3	4	4	0.000335	0.189
HN-SMG-Mucus	HN-2	10.RAW (F013060)	T-complex protein 1 subunit beta OS=Homo sapiens GN=CCT2 PE=1 SV=4	P78371	SwissProt_2012_09.fasta	57489.9	0.998	2	2	2	0.000167	0.0542
HN-SMG-Mucus	HN-2	10.RAW (F013060)	Keratin, type II cytoskeletal 8 OS=Homo sapiens GN=KRT8 PE=1 SV=7	P05787	SwissProt_2012_09.fasta	53706.2	1	3	7	9	0.000753	0.0994
HN-SMG-Mucus	HN-2	10.RAW (F013060)	Keratin, type I cytoskeletal 18 OS=Homo sapiens GN=KRT18 PE=1 SV=2	P05783	SwissProt_2012_09.fasta	48059	1	4	4	4	0.000335	0.0977
HN-SMG-Mucus	HN-2	10.RAW (F013060)	IgGFc-binding protein OS=Homo sapiens GN=FCGBP PE=1 SV=3	Q9Y6R7	SwissProt_2012_09.fasta	571983	1	9	12	12	0.001	0.029
HN-SMG-Mucus	HN-2	10.RAW (F013060)	L-lactate dehydrogenase B chain OS=Homo sapiens GN=LDHB PE=1 SV=2	P07195	SwissProt_2012_09.fasta	36638.6	1	3	3	3	0.000251	0.0898
HN-SMG-Mucus	HN-2	10.RAW (F013060)	Tubulin beta chain OS=Homo sapiens GN=TUBB PE=1 SV=2	P07437	SwissProt_2012_09.fasta	49670.6	1	3	5	7	0.000586	0.133
HN-SMG-Mucus	HN-2	10.RAW (F013060)	Heterogeneous nuclear ribonucleoproteins C1/C2 OS=Homo sapiens GN=HNRNPC PE=1 SV=4	P07910	SwissProt_2012_09.fasta	33670.5	1	3	3	3	0.000251	0.118
HN-SMG-Mucus	HN-2	10.RAW (F013060)	Heterogeneous nuclear ribonucleoprotein U OS=Homo sapiens GN=HNRNPU PE=1 SV=6	Q00839	SwissProt_2012_09.fasta	90585.2	0.999	2	2	2	0.000167	0.0255
HN-SMG-Mucus	HN-2	10.RAW (F013060)	Complement factor H OS=Homo sapiens GN=CFH PE=1 SV=4	P08603	SwissProt_2012_09.fasta	139096	1	4	4	4	0.000335	0.0333
HN-SMG-Mucus	HN-2	10.RAW (F013060)	Heterogeneous nuclear ribonucleoprotein A1 OS=Homo sapiens GN=HNRNPA1 PE=1 SV=5	P09651	SwissProt_2012_09.fasta	38747	1	3	3	3	0.000251	0.11
HN-SMG-Mucus	HN-2	10.RAW (F013060)	Neutral alpha-glucosidase AB OS=Homo sapiens GN=GANAB PE=1 SV=3	Q14697	SwissProt_2012_09.fasta	106876	1	3	3	3	0.000251	0.0424
HN-SMG-Mucus	HN-2	10.RAW (F013060)	78 kDa glucose-regulated protein OS=Homo sapiens GN=HSPA5 PE=1 SV=2	P11021	SwissProt_2012_09.fasta	72334.7	1	4	5	6	0.000502	0.0872
HN-SMG-Mucus	HN-2	10.RAW (F013060)	Sulfide:quinone oxidoreductase, mitochondrial OS=Homo sapiens GN=SQRDL PE=1 SV=1	Q9Y6N5	SwissProt_2012_09.fasta	49962	1	3	3	3	0.000251	0.102
HN-SMG-Mucus	HN-2	10.RAW (F013060)	Triosephosphate isomerase OS=Homo sapiens GN=TPI1 PE=1 SV=3	P60174	SwissProt_2012_09.fasta	30790.8	0.998	2	2	3	0.000251	0.0909
HN-SMG-Mucus	HN-2	10.RAW (F013060)	Heat shock cognate 71 kDa protein OS=Homo sapiens GN=HSPA8 PE=1 SV=1	P11142	SwissProt_2012_09.fasta	70899.8	1	4	4	4	0.000335	0.0805
HN-SMG-Mucus	HN-2	10.RAW (F013060)	Phosphoglycerate mutase 1 OS=Homo sapiens GN=PGAM1 PE=1 SV=2	P18669	SwissProt_2012_09.fasta	28804.8	0.998	2	2	2	0.000167	0.0827
HN-SMG-Mucus	HN-2	10.RAW (F013060)	Superoxide dismutase [Mn], mitochondrial OS=Homo sapiens GN=SOD2 PE=1 SV=2	P04179	SwissProt_2012_09.fasta	24722.6	0.998	2	2	2	0.000167	0.0811
HN-SMG-Mucus	HN-2	10.RAW (F013060)	Transketolase OS=Homo sapiens GN=TKT PE=1 SV=3	P29401	SwissProt_2012_09.fasta	67879.4	0.998	2	2	2	0.000167	0.0546
HN-SMG-Mucus	HN-2	10.RAW (F013060)	Cathepsin B OS=Homo sapiens GN=CTSB PE=1 SV=3	P07858	SwissProt_2012_09.fasta	37821.2	0.998	2	2	2	0.000167	0.103
HN-SMG-Mucus	HN-2	10.RAW (F013060)	Desmoplakin OS=Homo sapiens GN=DSP PE=1 SV=3	P15924	SwissProt_2012_09.fasta	331781	0.998	2	2	2	0.000167	0.00871
HN-SMG-Mucus	HN-2	10.RAW (F013060)	Phosphoglycerate kinase 1 OS=Homo sapiens GN=PGK1 PE=1 SV=3	P00558	SwissProt_2012_09.fasta	44615.3	0.998	2	2	2	0.000167	0.0743
HN-SMG-Mucus	HN-2	10.RAW (F013060)	Filamin-B OS=Homo sapiens GN=FLNB PE=1 SV=2	O75369	SwissProt_2012_09.fasta	278159	1	5	5	5	0.000418	0.0269
HN-SMG-Mucus	HN-2	10.RAW (F013060)	Actin, cytoplasmic 2 OS=Homo sapiens GN=ACTG1 PE=1 SV=1	P63261	SwissProt_2012_09.fasta	41793.9	1	3	4	5	0.000418	0.139
HN-SMG-Mucus	HN-2	10.RAW (F013060)	Keratin, type I cytoskeletal 19 OS=Homo sapiens GN=KRT19 PE=1 SV=4	P08727	SwissProt_2012_09.fasta	44107.1	1	7	11	16	0.00134	0.213
HN-SMG-Mucus	HN-2	10.RAW (F013060)	Sodium/potassium-transporting ATPase subunit alpha-1 OS=Homo sapiens GN=ATP1A1 PE=1 SV=1	P05023	SwissProt_2012_09.fasta	112900	0.998	2	2	2	0.000167	0.0166
HN-SMG-Mucus	HN-2	10.RAW (F013060)	Guanine nucleotide-binding protein subunit beta-2-like 1 OS=Homo sapiens GN=GNB2L1 PE=1 SV=3	P63244	SwissProt_2012_09.fasta	35077	0.998	2	2	2	0.000167	0.136
HN-SMG-Mucus	HN-2	10.RAW (F013060)	Glycogen phosphorylase, brain form OS=Homo sapiens GN=PYGB PE=1 SV=5	P11216	SwissProt_2012_09.fasta	96698.3	0.998	2	2	2	0.000167	0.0285
HN-SMG-Mucus	HN-2	10.RAW (F013060)	Deleted in malignant brain tumors 1 protein OS=Homo sapiens GN=DMBT1 PE=1 SV=2	Q9UGM3	SwissProt_2012_09.fasta	260726	0.998	2	2	3	0.000251	0.0058
HN-SMG-Mucus	HN-2	10.RAW (F013060)	X-ray repair cross-complementing protein 6 OS=Homo sapiens GN=XRCC6 PE=1 SV=2	P12956	SwissProt_2012_09.fasta	69846.4	0.998	2	2	2	0.000167	0.046
HN-SMG-Mucus	HN-2	10.RAW (F013060)	Uteroglobin OS=Homo sapiens GN=SCGB1A1 PE=1 SV=1	P11684	SwissProt_2012_09.fasta	9994.2	0.998	2	2	2	0.000167	0.121
HN-SMG-Mucus	HN-3	12.RAW (F013062)	Keratin, type II cytoskeletal 1 OS=Homo sapiens GN=KRT1 PE=1 SV=6	P04264	SwissProt_2012_09.fasta	66040.3	1	4	4	4	0.000342	0.0761
HN-SMG-Mucus	HN-3	12.RAW (F013062)	Moesin OS=Homo sapiens GN=MSN PE=1 SV=3	P26038	SwissProt_2012_09.fasta	67821.8	1	5	5	6	0.000513	0.0936
HN-SMG-Mucus	HN-3	12.RAW (F013062)	40S ribosomal protein S2 OS=Homo sapiens GN=RPS2 PE=1 SV=2	P15880	SwissProt_2012_09.fasta	31325.2	1	3	3	3	0.000256	0.109
HN-SMG-Mucus	HN-3	12.RAW (F013062)	Protein FAM3C OS=Homo sapiens GN=FAM3C PE=1 SV=1	Q92520	SwissProt_2012_09.fasta	24680.9	0.998	2	2	2	0.000171	0.0881
HN-SMG-Mucus	HN-3	12.RAW (F013062)	Nucleolin OS=Homo sapiens GN=NCL PE=1 SV=3	P19338	SwissProt_2012_09.fasta	76615.9	0.998	2	2	2	0.000171	0.0338
HN-SMG-Mucus	HN-3	12.RAW (F013062)	Fibrinogen gamma chain OS=Homo sapiens GN=FGG PE=1 SV=3	P02679	SwissProt_2012_09.fasta	51513.3	1	2	2	2	0.000171	0.0464
HN-SMG-Mucus	HN-3	12.RAW (F013062)	Fibrinogen alpha chain OS=Homo sapiens GN=FGA PE=1 SV=2	P02671	SwissProt_2012_09.fasta	94973.4	1	7	8	8	0.000683	0.129
HN-SMG-Mucus	HN-3	12.RAW (F013062)	Peroxiredoxin-1 OS=Homo sapiens GN=PRDX1 PE=1 SV=1	Q06830	SwissProt_2012_09.fasta	22110.9	1	5	6	7	0.000598	0.281
HN-SMG-Mucus	HN-3	12.RAW (F013062)	Far upstream element-binding protein 1 OS=Homo sapiens GN=FUBP1 PE=1 SV=3	Q96AE4	SwissProt_2012_09.fasta	67560.6	1	2	2	2	0.000171	0.0326
HN-SMG-Mucus	HN-3	12.RAW (F013062)	Mucin-5AC (Fragments) OS=Homo sapiens GN=MUC5AC PE=1 SV=3	P98088	SwissProt_2012_09.fasta	526585	1	3	3	3	0.000256	0.0113
HN-SMG-Mucus	HN-3	12.RAW (F013062)	Filamin-B OS=Homo sapiens GN=FLNB PE=1 SV=2	O75369	SwissProt_2012_09.fasta	278159	1	6	6	6	0.000513	0.0296
HN-SMG-Mucus	HN-3	12.RAW (F013062)	Protein disulfide-isomerase A6 OS=Homo sapiens GN=PDIA6 PE=1 SV=1	Q15084	SwissProt_2012_09.fasta	48122.3	1	4	4	5	0.000427	0.177
HN-SMG-Mucus	HN-3	12.RAW (F013062)	Apolipoprotein A-I OS=Homo sapiens GN=APOA1 PE=1 SV=1	P02647	SwissProt_2012_09.fasta	30778.5	1	3	3	3	0.000256	0.161
HN-SMG-Mucus	HN-3	12.RAW (F013062)	Periplakin OS=Homo sapiens GN=PPL PE=1 SV=4	O60437	SwissProt_2012_09.fasta	204747	0.998	2	2	2	0.000171	0.0142
HN-SMG-Mucus	HN-3	12.RAW (F013062)	T-complex protein 1 subunit theta OS=Homo sapiens GN=CCT8 PE=1 SV=4	P50990	SwissProt_2012_09.fasta	59621	0.999	2	2	3	0.000256	0.0529
HN-SMG-Mucus	HN-3	12.RAW (F013062)	NADH-cytochrome b5 reductase 3 OS=Homo sapiens GN=CYB5R3 PE=1 SV=3	P00387	SwissProt_2012_09.fasta	34236.3	0.998	2	2	2	0.000171	0.103
HN-SMG-Mucus	HN-3	12.RAW (F013062)	Lumican OS=Homo sapiens GN=LUM PE=1 SV=2	P51884	SwissProt_2012_09.fasta	38431.5	0.998	2	2	3	0.000256	0.0828
HN-SMG-Mucus	HN-3	12.RAW (F013062)	Lamin-B2 OS=Homo sapiens GN=LMNB2 PE=1 SV=3	Q03252	SwissProt_2012_09.fasta	67689.8	0.998	2	2	2	0.000171	0.0483
HN-SMG-Mucus	HN-3	12.RAW (F013062)	Vacuolar protein sorting-associated protein 13C OS=Homo sapiens GN=VPS13C PE=1 SV=1	Q709C8	SwissProt_2012_09.fasta	422396	0.998	2	2	2	0.000171	0.00613
HN-SMG-Mucus	HN-3	12.RAW (F013062)	Aldehyde dehydrogenase, dimeric NADP-preferring OS=Homo sapiens GN=ALDH3A1 PE=1 SV=3	P30838	SwissProt_2012_09.fasta	50395.7	1	4	4	4	0.000342	0.17
HN-SMG-Mucus	HN-3	12.RAW (F013062)	Plectin OS=Homo sapiens GN=PLEC PE=1 SV=3	Q15149	SwissProt_2012_09.fasta	531784	1	16	16	16	0.00137	0.0391
HN-SMG-Mucus	HN-3	12.RAW (F013062)	Eukaryotic initiation factor 4A-I OS=Homo sapiens GN=EIF4A1 PE=1 SV=1	P60842	SwissProt_2012_09.fasta	46155.3	1	3	4	4	0.000342	0.0911
HN-SMG-Mucus	HN-3	12.RAW (F013062)	ERO1-like protein alpha OS=Homo sapiens GN=ERO1L PE=1 SV=2	Q96HE7	SwissProt_2012_09.fasta	54394.7	0.998	2	2	2	0.000171	0.0513
HN-SMG-Mucus	HN-3	12.RAW (F013062)	Coatomer subunit gamma-1 OS=Homo sapiens GN=COPG1 PE=1 SV=1	Q9Y678	SwissProt_2012_09.fasta	97719.4	0.998	2	2	3	0.000256	0.0263
HN-SMG-Mucus	HN-3	12.RAW (F013062)	Cytoskeleton-associated protein 4 OS=Homo sapiens GN=CKAP4 PE=1 SV=2	Q07065	SwissProt_2012_09.fasta	66022.2	0.998	2	2	2	0.000171	0.0382
HN-SMG-Mucus	HN-3	12.RAW (F013062)	Nucleophosmin OS=Homo sapiens GN=NPM1 PE=1 SV=2	P06748	SwissProt_2012_09.fasta	32575.5	0.998	2	3	4	0.000342	0.119
HN-SMG-Mucus	HN-3	12.RAW (F013062)	ATP synthase subunit beta, mitochondrial OS=Homo sapiens GN=ATP5B PE=1 SV=3	P06576	SwissProt_2012_09.fasta	56560.6	1	5	5	6	0.000513	0.117
HN-SMG-Mucus	HN-3	12.RAW (F013062)	Fibrinogen beta chain OS=Homo sapiens GN=FGB PE=1 SV=2	P02675	SwissProt_2012_09.fasta	55928.6	1	8	10	11	0.00094	0.228
HN-SMG-Mucus	HN-3	12.RAW (F013062)	Endoplasmin OS=Homo sapiens GN=HSP90B1 PE=1 SV=1	P14625	SwissProt_2012_09.fasta	92471.7	1	5	5	5	0.000427	0.0872
HN-SMG-Mucus	HN-3	12.RAW (F013062)	Aspartyl/asparaginyl beta-hydroxylase OS=Homo sapiens GN=ASPH PE=1 SV=3	Q12797	SwissProt_2012_09.fasta	85862.6	0.998	2	2	2	0.000171	0.0462
HN-SMG-Mucus	HN-3	12.RAW (F013062)	Tubulin alpha-1B chain OS=Homo sapiens GN=TUBA1B PE=1 SV=1	P68363	SwissProt_2012_09.fasta	50151.7	1	6	7	7	0.000598	0.193
HN-SMG-Mucus	HN-3	12.RAW (F013062)	Pyruvate kinase isozymes M1/M2 OS=Homo sapiens GN=PKM PE=1 SV=4	P14618	SwissProt_2012_09.fasta	57937.5	1	9	11	12	0.00103	0.245
HN-SMG-Mucus	HN-3	12.RAW (F013062)	Serine/threonine-protein phosphatase 2A 65 kDa regulatory subunit A alpha isoform OS=Homo sapiens GN=PPP2R1A PE=1 SV=4	P30153	SwissProt_2012_09.fasta	65309.7	1	3	3	3	0.000256	0.0764
HN-SMG-Mucus	HN-3	12.RAW (F013062)	ATP synthase subunit gamma, mitochondrial OS=Homo sapiens GN=ATP5C1 PE=1 SV=1	P36542	SwissProt_2012_09.fasta	32998	0.998	2	2	2	0.000171	0.0638
HN-SMG-Mucus	HN-3	12.RAW (F013062)	Keratin, type I cytoskeletal 17 OS=Homo sapiens GN=KRT17 PE=1 SV=2	Q04695	SwissProt_2012_09.fasta	48106.7	1	5	7	7	0.000598	0.225
HN-SMG-Mucus	HN-3	12.RAW (F013062)	Complement C3 OS=Homo sapiens GN=C3 PE=1 SV=2	P01024	SwissProt_2012_09.fasta	187149	1	11	13	13	0.00111	0.0992
HN-SMG-Mucus	HN-3	12.RAW (F013062)	Alpha-2-macroglobulin OS=Homo sapiens GN=A2M PE=1 SV=3	P01023	SwissProt_2012_09.fasta	163290	1	3	3	3	0.000256	0.0305
HN-SMG-Mucus	HN-3	12.RAW (F013062)	Glutathione S-transferase P OS=Homo sapiens GN=GSTP1 PE=1 SV=2	P09211	SwissProt_2012_09.fasta	23356.7	1	4	6	6	0.000513	0.267
HN-SMG-Mucus	HN-3	12.RAW (F013062)	Zinc-alpha-2-glycoprotein OS=Homo sapiens GN=AZGP1 PE=1 SV=2	P25311	SwissProt_2012_09.fasta	34258.6	1	3	3	3	0.000256	0.107
HN-SMG-Mucus	HN-3	12.RAW (F013062)	ATP synthase subunit alpha, mitochondrial OS=Homo sapiens GN=ATP5A1 PE=1 SV=1	P25705	SwissProt_2012_09.fasta	59752.1	1	7	7	7	0.000598	0.161
HN-SMG-Mucus	HN-3	12.RAW (F013062)	Proliferation-associated protein 2G4 OS=Homo sapiens GN=PA2G4 PE=1 SV=3	Q9UQ80	SwissProt_2012_09.fasta	43786.7	0.998	2	2	2	0.000171	0.0584
HN-SMG-Mucus	HN-3	12.RAW (F013062)	Peptidyl-prolyl cis-trans isomerase A OS=Homo sapiens GN=PPIA PE=1 SV=2	P62937	SwissProt_2012_09.fasta	18012.9	1	3	3	3	0.000256	0.23
HN-SMG-Mucus	HN-3	12.RAW (F013062)	Alcohol dehydrogenase class 4 mu/sigma chain OS=Homo sapiens GN=ADH7 PE=1 SV=2	P40394	SwissProt_2012_09.fasta	41481.4	1	4	4	4	0.000342	0.142
HN-SMG-Mucus	HN-3	12.RAW (F013062)	14-3-3 protein theta OS=Homo sapiens GN=YWHAQ PE=1 SV=1	P27348	SwissProt_2012_09.fasta	27765.4	0.998	2	3	3	0.000256	0.167
HN-SMG-Mucus	HN-3	12.RAW (F013062)	Voltage-dependent anion-selective channel protein 2 OS=Homo sapiens GN=VDAC2 PE=1 SV=2	P45880	SwissProt_2012_09.fasta	31567.3	0.998	2	2	2	0.000171	0.139
HN-SMG-Mucus	HN-3	12.RAW (F013062)	Cytosol aminopeptidase OS=Homo sapiens GN=LAP3 PE=1 SV=3	P28838	SwissProt_2012_09.fasta	56167.8	1	3	3	3	0.000256	0.0867
HN-SMG-Mucus	HN-3	12.RAW (F013062)	Coatomer subunit beta' OS=Homo sapiens GN=COPB2 PE=1 SV=2	P35606	SwissProt_2012_09.fasta	102489	0.996	2	2	2	0.000171	0.0309
HN-SMG-Mucus	HN-3	12.RAW (F013062)	ATP-dependent RNA helicase DDX3X OS=Homo sapiens GN=DDX3X PE=1 SV=3	O00571	SwissProt_2012_09.fasta	73245.8	0.999	2	2	2	0.000171	0.0317
HN-SMG-Mucus	HN-3	12.RAW (F013062)	Protein disulfide-isomerase A3 OS=Homo sapiens GN=PDIA3 PE=1 SV=4	P30101	SwissProt_2012_09.fasta	56784.6	1	4	4	4	0.000342	0.0871
HN-SMG-Mucus	HN-3	12.RAW (F013062)	Heterogeneous nuclear ribonucleoprotein H OS=Homo sapiens GN=HNRNPH1 PE=1 SV=4	P31943	SwissProt_2012_09.fasta	49229.8	0.998	2	2	2	0.000171	0.0668
HN-SMG-Mucus	HN-3	12.RAW (F013062)	26S protease regulatory subunit 7 OS=Homo sapiens GN=PSMC2 PE=1 SV=3	P35998	SwissProt_2012_09.fasta	48635.6	0.998	2	2	2	0.000171	0.0531
HN-SMG-Mucus	HN-3	12.RAW (F013062)	Annexin A1 OS=Homo sapiens GN=ANXA1 PE=1 SV=2	P04083	SwissProt_2012_09.fasta	38715.9	1	6	7	8	0.000683	0.202
HN-SMG-Mucus	HN-3	12.RAW (F013062)	Vimentin OS=Homo sapiens GN=VIM PE=1 SV=4	P08670	SwissProt_2012_09.fasta	53652.7	1	2	2	2	0.000171	0.0408
HN-SMG-Mucus	HN-3	12.RAW (F013062)	Neutrophil elastase OS=Homo sapiens GN=ELANE PE=1 SV=1	P08246	SwissProt_2012_09.fasta	28517.4	1	2	2	2	0.000171	0.0712
HN-SMG-Mucus	HN-3	12.RAW (F013062)	Neutrophil gelatinase-associated lipocalin OS=Homo sapiens GN=LCN2 PE=1 SV=2	P80188	SwissProt_2012_09.fasta	22588.9	1	4	5	5	0.000427	0.333
HN-SMG-Mucus	HN-3	12.RAW (F013062)	L-lactate dehydrogenase A chain OS=Homo sapiens GN=LDHA PE=1 SV=2	P00338	SwissProt_2012_09.fasta	36689.2	1	6	6	6	0.000513	0.232
HN-SMG-Mucus	HN-3	12.RAW (F013062)	2,4-dienoyl-CoA reductase, mitochondrial OS=Homo sapiens GN=DECR1 PE=1 SV=1	Q16698	SwissProt_2012_09.fasta	36068.9	0.998	2	2	2	0.000171	0.0627
HN-SMG-Mucus	HN-3	12.RAW (F013062)	Junction plakoglobin OS=Homo sapiens GN=JUP PE=1 SV=3	P14923	SwissProt_2012_09.fasta	81745.9	1	4	4	4	0.000342	0.0604
HN-SMG-Mucus	HN-3	12.RAW (F013062)	CD166 antigen OS=Homo sapiens GN=ALCAM PE=1 SV=2	Q13740	SwissProt_2012_09.fasta	65103.8	0.998	2	2	2	0.000171	0.0446
HN-SMG-Mucus	HN-3	12.RAW (F013062)	Peptidyl-prolyl cis-trans isomerase B OS=Homo sapiens GN=PPIB PE=1 SV=2	P23284	SwissProt_2012_09.fasta	23743.2	0.998	2	2	2	0.000171	0.0787
HN-SMG-Mucus	HN-3	12.RAW (F013062)	Elongation factor Tu, mitochondrial OS=Homo sapiens GN=TUFM PE=1 SV=2	P49411	SwissProt_2012_09.fasta	49542.4	1	3	3	3	0.000256	0.0796
HN-SMG-Mucus	HN-3	12.RAW (F013062)	Stress-70 protein, mitochondrial OS=Homo sapiens GN=HSPA9 PE=1 SV=2	P38646	SwissProt_2012_09.fasta	73681.3	1	5	6	6	0.000513	0.0972
HN-SMG-Mucus	HN-3	12.RAW (F013062)	14-3-3 protein epsilon OS=Homo sapiens GN=YWHAE PE=1 SV=1	P62258	SwissProt_2012_09.fasta	29175	1	3	3	3	0.000256	0.141
HN-SMG-Mucus	HN-3	12.RAW (F013062)	Probable ATP-dependent RNA helicase DDX17 OS=Homo sapiens GN=DDX17 PE=1 SV=2	Q92841	SwissProt_2012_09.fasta	80274	0.998	2	2	2	0.000171	0.0302
HN-SMG-Mucus	HN-3	12.RAW (F013062)	Transitional endoplasmic reticulum ATPase OS=Homo sapiens GN=VCP PE=1 SV=4	P55072	SwissProt_2012_09.fasta	89324.8	1	3	4	4	0.000342	0.0533
HN-SMG-Mucus	HN-3	12.RAW (F013062)	Neutrophil defensin 1 OS=Homo sapiens GN=DEFA1 PE=1 SV=1	P59665,P59666	SwissProt_2012_09.fasta	10201	0.998	2	2	2	0.000171	0.191
HN-SMG-Mucus	HN-3	12.RAW (F013062)	Heterogeneous nuclear ribonucleoprotein Q OS=Homo sapiens GN=SYNCRIP PE=1 SV=2	O60506	SwissProt_2012_09.fasta	69603.5	1	3	3	3	0.000256	0.061
HN-SMG-Mucus	HN-3	12.RAW (F013062)	Clathrin heavy chain 1 OS=Homo sapiens GN=CLTC PE=1 SV=5	Q00610	SwissProt_2012_09.fasta	191619	1	6	6	6	0.000513	0.0513
HN-SMG-Mucus	HN-3	12.RAW (F013062)	Mucin-5B OS=Homo sapiens GN=MUC5B PE=1 SV=3	Q9HC84	SwissProt_2012_09.fasta	596324	1	21	25	35	0.00299	0.0561
HN-SMG-Mucus	HN-3	12.RAW (F013062)	Calnexin OS=Homo sapiens GN=CANX PE=1 SV=2	P27824	SwissProt_2012_09.fasta	67570.2	1	4	4	4	0.000342	0.0845
HN-SMG-Mucus	HN-3	12.RAW (F013062)	Spectrin alpha chain, non-erythrocytic 1 OS=Homo sapiens GN=SPTAN1 PE=1 SV=3	Q13813	SwissProt_2012_09.fasta	284543	1	3	3	4	0.000342	0.0158
HN-SMG-Mucus	HN-3	12.RAW (F013062)	Ubiquitin-like modifier-activating enzyme 1 OS=Homo sapiens GN=UBA1 PE=1 SV=3	P22314	SwissProt_2012_09.fasta	117850	0.998	2	2	2	0.000171	0.0255
HN-SMG-Mucus	HN-3	12.RAW (F013062)	Zymogen granule protein 16 homolog B OS=Homo sapiens GN=ZG16B PE=1 SV=3	Q96DA0	SwissProt_2012_09.fasta	22739.4	0.998	2	2	2	0.000171	0.0817
HN-SMG-Mucus	HN-3	12.RAW (F013062)	Enoyl-CoA hydratase, mitochondrial OS=Homo sapiens GN=ECHS1 PE=1 SV=4	P30084	SwissProt_2012_09.fasta	31388.2	0.998	2	2	3	0.000256	0.131
HN-SMG-Mucus	HN-3	12.RAW (F013062)	Ceruloplasmin OS=Homo sapiens GN=CP PE=1 SV=1	P00450	SwissProt_2012_09.fasta	122208	1	3	4	4	0.000342	0.0376
HN-SMG-Mucus	HN-3	12.RAW (F013062)	Vitronectin OS=Homo sapiens GN=VTN PE=1 SV=1	P04004	SwissProt_2012_09.fasta	54306.1	0.998	2	2	2	0.000171	0.0628
HN-SMG-Mucus	HN-3	12.RAW (F013062)	Annexin A3 OS=Homo sapiens GN=ANXA3 PE=1 SV=3	P12429	SwissProt_2012_09.fasta	36377.4	0.998	2	2	2	0.000171	0.0805
HN-SMG-Mucus	HN-3	12.RAW (F013062)	Cytochrome b-c1 complex subunit 2, mitochondrial OS=Homo sapiens GN=UQCRC2 PE=1 SV=3	P22695	SwissProt_2012_09.fasta	48443.4	1	3	3	3	0.000256	0.115
HN-SMG-Mucus	HN-3	12.RAW (F013062)	Voltage-dependent anion-selective channel protein 1 OS=Homo sapiens GN=VDAC1 PE=1 SV=2	P21796	SwissProt_2012_09.fasta	30773.9	0.998	2	2	2	0.000171	0.0883
HN-SMG-Mucus	HN-3	12.RAW (F013062)	Galectin-7 OS=Homo sapiens GN=LGALS7 PE=1 SV=2	P47929	SwissProt_2012_09.fasta	15074.7	0.998	2	2	2	0.000171	0.221
HN-SMG-Mucus	HN-3	12.RAW (F013062)	Complement factor B OS=Homo sapiens GN=CFB PE=1 SV=2	P00751	SwissProt_2012_09.fasta	85533.2	1	6	6	6	0.000513	0.12
HN-SMG-Mucus	HN-3	12.RAW (F013062)	Keratin, type II cytoskeletal 6A OS=Homo sapiens GN=KRT6A PE=1 SV=3	P02538	SwissProt_2012_09.fasta	60046.4	1	10	12	13	0.00111	0.344
HN-SMG-Mucus	HN-3	12.RAW (F013062)	Keratin, type I cytoskeletal 14 OS=Homo sapiens GN=KRT14 PE=1 SV=4	P02533	SwissProt_2012_09.fasta	51562.5	1	3	3	3	0.000256	0.216
HN-SMG-Mucus	HN-3	12.RAW (F013062)	Transaldolase OS=Homo sapiens GN=TALDO1 PE=1 SV=2	P37837	SwissProt_2012_09.fasta	37541.7	1	6	7	7	0.000598	0.187
HN-SMG-Mucus	HN-3	12.RAW (F013062)	Prohibitin OS=Homo sapiens GN=PHB PE=1 SV=1	P35232	SwissProt_2012_09.fasta	29804.6	1	3	3	3	0.000256	0.114
HN-SMG-Mucus	HN-3	12.RAW (F013062)	Catenin alpha-1 OS=Homo sapiens GN=CTNNA1 PE=1 SV=1	P35221	SwissProt_2012_09.fasta	100073	0.998	2	2	2	0.000171	0.0342
HN-SMG-Mucus	HN-3	12.RAW (F013062)	Myoferlin OS=Homo sapiens GN=MYOF PE=1 SV=1	Q9NZM1	SwissProt_2012_09.fasta	234716	1	3	3	3	0.000256	0.018
HN-SMG-Mucus	HN-3	12.RAW (F013062)	Arachidonate 15-lipoxygenase OS=Homo sapiens GN=ALOX15 PE=1 SV=3	P16050	SwissProt_2012_09.fasta	74805.9	1	6	6	7	0.000598	0.13
HN-SMG-Mucus	HN-3	12.RAW (F013062)	Alpha-1-antitrypsin OS=Homo sapiens GN=SERPINA1 PE=1 SV=3	P01009	SwissProt_2012_09.fasta	46737.9	0.998	2	2	2	0.000171	0.0813
HN-SMG-Mucus	HN-3	12.RAW (F013062)	Calpain-1 catalytic subunit OS=Homo sapiens GN=CAPN1 PE=1 SV=1	P07384	SwissProt_2012_09.fasta	81892.6	0.998	2	2	2	0.000171	0.0322
HN-SMG-Mucus	HN-3	12.RAW (F013062)	Heterogeneous nuclear ribonucleoproteins A2/B1 OS=Homo sapiens GN=HNRNPA2B1 PE=1 SV=2	P22626	SwissProt_2012_09.fasta	37430.3	0.999	2	2	2	0.000171	0.051
HN-SMG-Mucus	HN-3	12.RAW (F013062)	HLA class I histocompatibility antigen, Cw-12 alpha chain OS=Homo sapiens GN=HLA-C PE=1 SV=2	P30508,Q07000	SwissProt_2012_09.fasta	40885.3	1	3	3	3	0.000256	0.0929
HN-SMG-Mucus	HN-3	12.RAW (F013062)	Annexin A4 OS=Homo sapiens GN=ANXA4 PE=1 SV=4	P09525	SwissProt_2012_09.fasta	35884.3	1	3	3	3	0.000256	0.122
HN-SMG-Mucus	HN-3	12.RAW (F013062)	Galectin-3-binding protein OS=Homo sapiens GN=LGALS3BP PE=1 SV=1	Q08380	SwissProt_2012_09.fasta	65332.1	0.998	2	2	2	0.000171	0.0838
HN-SMG-Mucus	HN-3	12.RAW (F013062)	Keratin, type II cytoskeletal 5 OS=Homo sapiens GN=KRT5 PE=1 SV=3	P13647	SwissProt_2012_09.fasta	62379.6	1	16	21	43	0.00367	0.297
HN-SMG-Mucus	HN-3	12.RAW (F013062)	Keratin, type I cytoskeletal 13 OS=Homo sapiens GN=KRT13 PE=1 SV=4	P13646	SwissProt_2012_09.fasta	49589.3	1	8	11	11	0.00094	0.312
HN-SMG-Mucus	HN-3	12.RAW (F013062)	Keratin, type I cytoskeletal 10 OS=Homo sapiens GN=KRT10 PE=1 SV=6	P13645	SwissProt_2012_09.fasta	58828.8	1	3	3	3	0.000256	0.101
HN-SMG-Mucus	HN-3	12.RAW (F013062)	Erythrocyte band 7 integral membrane protein OS=Homo sapiens GN=STOM PE=1 SV=3	P27105	SwissProt_2012_09.fasta	31732.1	1	3	4	4	0.000342	0.146
HN-SMG-Mucus	HN-3	12.RAW (F013062)	Myosin-9 OS=Homo sapiens GN=MYH9 PE=1 SV=4	P35579	SwissProt_2012_09.fasta	226538	1	13	14	14	0.0012	0.0878
HN-SMG-Mucus	HN-3	12.RAW (F013062)	Heterogeneous nuclear ribonucleoprotein K OS=Homo sapiens GN=HNRNPK PE=1 SV=1	P61978	SwissProt_2012_09.fasta	50978.5	1	2	3	3	0.000256	0.0432
HN-SMG-Mucus	HN-3	12.RAW (F013062)	Keratin, type II cytoskeletal 4 OS=Homo sapiens GN=KRT4 PE=1 SV=4	P19013	SwissProt_2012_09.fasta	57286.1	1	3	4	4	0.000342	0.0749
HN-SMG-Mucus	HN-3	12.RAW (F013062)	Keratin, type I cytoskeletal 15 OS=Homo sapiens GN=KRT15 PE=1 SV=3	P19012	SwissProt_2012_09.fasta	49212.9	1	5	7	8	0.000683	0.261
HN-SMG-Mucus	HN-3	12.RAW (F013062)	Malate dehydrogenase, mitochondrial OS=Homo sapiens GN=MDH2 PE=1 SV=3	P40926	SwissProt_2012_09.fasta	35503.7	1	8	8	8	0.000683	0.305
HN-SMG-Mucus	HN-3	12.RAW (F013062)	Heat shock protein HSP 90-beta OS=Homo sapiens GN=HSP90AB1 PE=1 SV=4	P08238	SwissProt_2012_09.fasta	83267.3	1	4	4	4	0.000342	0.0732
HN-SMG-Mucus	HN-3	12.RAW (F013062)	Cathepsin D OS=Homo sapiens GN=CTSD PE=1 SV=1	P07339	SwissProt_2012_09.fasta	44553	1	3	4	4	0.000342	0.107
HN-SMG-Mucus	HN-3	12.RAW (F013062)	Anterior gradient protein 2 homolog OS=Homo sapiens GN=AGR2 PE=1 SV=1	O95994	SwissProt_2012_09.fasta	19980.3	1	2	5	5	0.000427	0.16
HN-SMG-Mucus	HN-3	12.RAW (F013062)	Clusterin OS=Homo sapiens GN=CLU PE=1 SV=1	P10909	SwissProt_2012_09.fasta	52495	1	5	5	5	0.000427	0.122
HN-SMG-Mucus	HN-3	12.RAW (F013062)	ATP synthase subunit delta, mitochondrial OS=Homo sapiens GN=ATP5D PE=1 SV=2	P30049	SwissProt_2012_09.fasta	17489.9	0.997	2	2	2	0.000171	0.137
HN-SMG-Mucus	HN-3	12.RAW (F013062)	Peroxiredoxin-5, mitochondrial OS=Homo sapiens GN=PRDX5 PE=1 SV=4	P30044	SwissProt_2012_09.fasta	22086.4	0.998	2	2	3	0.000256	0.136
HN-SMG-Mucus	HN-3	12.RAW (F013062)	Endoplasmic reticulum resident protein 29 OS=Homo sapiens GN=ERP29 PE=1 SV=4	P30040	SwissProt_2012_09.fasta	28994.9	1	3	3	3	0.000256	0.207
HN-SMG-Mucus	HN-3	12.RAW (F013062)	Cytoplasmic dynein 1 heavy chain 1 OS=Homo sapiens GN=DYNC1H1 PE=1 SV=5	Q14204	SwissProt_2012_09.fasta	532406	1	4	4	4	0.000342	0.0151
HN-SMG-Mucus	HN-3	12.RAW (F013062)	3-hydroxyacyl-CoA dehydrogenase type-2 OS=Homo sapiens GN=HSD17B10 PE=1 SV=3	Q99714	SwissProt_2012_09.fasta	26923.1	0.998	2	2	2	0.000171	0.142
HN-SMG-Mucus	HN-3	12.RAW (F013062)	Keratin, type I cytoskeletal 9 OS=Homo sapiens GN=KRT9 PE=1 SV=3	P35527	SwissProt_2012_09.fasta	62065.9	1	3	3	3	0.000256	0.0449
HN-SMG-Mucus	HN-3	12.RAW (F013062)	Ras-related protein Rab-1A OS=Homo sapiens GN=RAB1A PE=1 SV=3	P62820	SwissProt_2012_09.fasta	22678.5	1	3	3	3	0.000256	0.19
HN-SMG-Mucus	HN-3	12.RAW (F013062)	Pyruvate dehydrogenase E1 component subunit beta, mitochondrial OS=Homo sapiens GN=PDHB PE=1 SV=3	P11177	SwissProt_2012_09.fasta	39233.4	1	3	3	3	0.000256	0.12
HN-SMG-Mucus	HN-3	12.RAW (F013062)	Trifunctional enzyme subunit alpha, mitochondrial OS=Homo sapiens GN=HADHA PE=1 SV=2	P40939	SwissProt_2012_09.fasta	83001.9	1	6	6	6	0.000513	0.104
HN-SMG-Mucus	HN-3	12.RAW (F013062)	Histone H4 OS=Homo sapiens GN=HIST1H4A PE=1 SV=2	P62805	SwissProt_2012_09.fasta	11367.7	1	3	4	5	0.000427	0.291
HN-SMG-Mucus	HN-3	12.RAW (F013062)	BPI fold-containing family B member 1 OS=Homo sapiens GN=BPIFB1 PE=2 SV=1	Q8TDL5	SwissProt_2012_09.fasta	52443.8	1	7	12	20	0.00171	0.182
HN-SMG-Mucus	HN-3	12.RAW (F013062)	Enoyl-CoA delta isomerase 1, mitochondrial OS=Homo sapiens GN=ECI1 PE=1 SV=1	P42126	SwissProt_2012_09.fasta	32816.5	0.998	2	2	2	0.000171	0.0762
HN-SMG-Mucus	HN-3	12.RAW (F013062)	Heat shock cognate 71 kDa protein OS=Homo sapiens GN=HSPA8 PE=1 SV=1	P11142	SwissProt_2012_09.fasta	70899.8	1	3	3	3	0.000256	0.104
HN-SMG-Mucus	HN-3	12.RAW (F013062)	Glyceraldehyde-3-phosphate dehydrogenase OS=Homo sapiens GN=GAPDH PE=1 SV=3	P04406	SwissProt_2012_09.fasta	36053.4	1	5	5	5	0.000427	0.221
HN-SMG-Mucus	HN-3	12.RAW (F013062)	Glutamate dehydrogenase 1, mitochondrial OS=Homo sapiens GN=GLUD1 PE=1 SV=2	P00367	SwissProt_2012_09.fasta	61399.7	1	8	8	8	0.000683	0.194
HN-SMG-Mucus	HN-3	12.RAW (F013062)	F-actin-capping protein subunit alpha-1 OS=Homo sapiens GN=CAPZA1 PE=1 SV=3	P52907	SwissProt_2012_09.fasta	32923.2	0.998	2	2	2	0.000171	0.0909
HN-SMG-Mucus	HN-3	12.RAW (F013062)	Elongation factor 2 OS=Homo sapiens GN=EEF2 PE=1 SV=4	P13639	SwissProt_2012_09.fasta	95340.1	1	5	5	5	0.000427	0.0839
HN-SMG-Mucus	HN-3	12.RAW (F013062)	Ras GTPase-activating-like protein IQGAP1 OS=Homo sapiens GN=IQGAP1 PE=1 SV=1	P46940	SwissProt_2012_09.fasta	189259	1	3	3	3	0.000256	0.0278
HN-SMG-Mucus	HN-3	12.RAW (F013062)	Fatty acid synthase OS=Homo sapiens GN=FASN PE=1 SV=3	P49327	SwissProt_2012_09.fasta	273427	1	5	5	5	0.000427	0.0259
HN-SMG-Mucus	HN-3	12.RAW (F013062)	Retinal dehydrogenase 1 OS=Homo sapiens GN=ALDH1A1 PE=1 SV=2	P00352	SwissProt_2012_09.fasta	54862.8	1	3	3	3	0.000256	0.0719
HN-SMG-Mucus	HN-3	12.RAW (F013062)	T-complex protein 1 subunit zeta OS=Homo sapiens GN=CCT6A PE=1 SV=3	P40227	SwissProt_2012_09.fasta	58025.3	0.998	2	2	2	0.000171	0.0471
HN-SMG-Mucus	HN-3	12.RAW (F013062)	Alpha-enolase OS=Homo sapiens GN=ENO1 PE=1 SV=2	P06733	SwissProt_2012_09.fasta	47170.2	1	7	8	8	0.000683	0.24
HN-SMG-Mucus	HN-3	12.RAW (F013062)	60S ribosomal protein L11 OS=Homo sapiens GN=RPL11 PE=1 SV=2	P62913	SwissProt_2012_09.fasta	20253.2	0.998	2	2	2	0.000171	0.129
HN-SMG-Mucus	HN-3	12.RAW (F013062)	Enhancer of rudimentary homolog OS=Homo sapiens GN=ERH PE=1 SV=1	P84090	SwissProt_2012_09.fasta	12259.3	0.998	2	2	2	0.000171	0.212
HN-SMG-Mucus	HN-3	12.RAW (F013062)	Serine/threonine-protein phosphatase PP1-gamma catalytic subunit OS=Homo sapiens GN=PPP1CC PE=1 SV=1	P36873,P62136,P62140	SwissProt_2012_09.fasta	36985.6	1	3	3	3	0.000256	0.136
HN-SMG-Mucus	HN-3	12.RAW (F013062)	Thioredoxin OS=Homo sapiens GN=TXN PE=1 SV=3	P10599	SwissProt_2012_09.fasta	11737.3	1	3	3	3	0.000256	0.295
HN-SMG-Mucus	HN-3	12.RAW (F013062)	60S ribosomal protein L6 OS=Homo sapiens GN=RPL6 PE=1 SV=3	Q02878	SwissProt_2012_09.fasta	32729.3	0.998	2	2	3	0.000256	0.111
HN-SMG-Mucus	HN-3	12.RAW (F013062)	Peroxiredoxin-2 OS=Homo sapiens GN=PRDX2 PE=1 SV=5	P32119	SwissProt_2012_09.fasta	21892.4	0.998	2	2	2	0.000171	0.141
HN-SMG-Mucus	HN-3	12.RAW (F013062)	Fibulin-1 OS=Homo sapiens GN=FBLN1 PE=1 SV=4	P23142	SwissProt_2012_09.fasta	77211.6	0.998	2	2	2	0.000171	0.0299
HN-SMG-Mucus	HN-3	12.RAW (F013062)	Ras-related protein Rap-1b OS=Homo sapiens GN=RAP1B PE=1 SV=1	P61224	SwissProt_2012_09.fasta	20824.9	0.998	2	2	2	0.000171	0.125
HN-SMG-Mucus	HN-3	12.RAW (F013062)	Major vault protein OS=Homo sapiens GN=MVP PE=1 SV=4	Q14764	SwissProt_2012_09.fasta	99326	1	5	5	5	0.000427	0.0705
HN-SMG-Mucus	HN-3	12.RAW (F013062)	Thrombospondin-1 OS=Homo sapiens GN=THBS1 PE=1 SV=2	P07996	SwissProt_2012_09.fasta	129382	0.998	2	2	2	0.000171	0.0205
HN-SMG-Mucus	HN-3	12.RAW (F013062)	Immunoglobulin J chain OS=Homo sapiens GN=IGJ PE=1 SV=4	P01591	SwissProt_2012_09.fasta	18098.5	1	2	2	2	0.000171	0.17
HN-SMG-Mucus	HN-3	12.RAW (F013062)	Annexin A2 OS=Homo sapiens GN=ANXA2 PE=1 SV=2	P07355	SwissProt_2012_09.fasta	38606.1	1	6	7	8	0.000683	0.227
HN-SMG-Mucus	HN-3	12.RAW (F013062)	BPI fold-containing family A member 1 OS=Homo sapiens GN=BPIFA1 PE=1 SV=1	Q9NP55	SwissProt_2012_09.fasta	26714.1	0.998	2	2	2	0.000171	0.129
HN-SMG-Mucus	HN-3	12.RAW (F013062)	Serpin B3 OS=Homo sapiens GN=SERPINB3 PE=1 SV=2	P29508	SwissProt_2012_09.fasta	44565.9	1	3	4	4	0.000342	0.0872
HN-SMG-Mucus	HN-3	12.RAW (F013062)	40S ribosomal protein SA OS=Homo sapiens GN=RPSA PE=1 SV=4	P08865	SwissProt_2012_09.fasta	32854.1	0.998	2	2	2	0.000171	0.0847
HN-SMG-Mucus	HN-3	12.RAW (F013062)	Myeloperoxidase OS=Homo sapiens GN=MPO PE=1 SV=1	P05164	SwissProt_2012_09.fasta	83871.1	1	7	7	7	0.000598	0.126
HN-SMG-Mucus	HN-3	12.RAW (F013062)	Calcium-binding mitochondrial carrier protein SCaMC-1 OS=Homo sapiens GN=SLC25A24 PE=1 SV=2	Q6NUK1	SwissProt_2012_09.fasta	53356.6	0.998	2	2	2	0.000171	0.0524
HN-SMG-Mucus	HN-3	12.RAW (F013062)	Isocitrate dehydrogenase [NADP], mitochondrial OS=Homo sapiens GN=IDH2 PE=1 SV=2	P48735	SwissProt_2012_09.fasta	50910.4	0.998	2	3	3	0.000256	0.0487
HN-SMG-Mucus	HN-3	12.RAW (F013062)	Hemoglobin subunit beta OS=Homo sapiens GN=HBB PE=1 SV=2	P68871	SwissProt_2012_09.fasta	15998	1	4	5	7	0.000598	0.367
HN-SMG-Mucus	HN-3	12.RAW (F013062)	Apolipoprotein B-100 OS=Homo sapiens GN=APOB PE=1 SV=2	P04114	SwissProt_2012_09.fasta	515615	0.998	2	2	2	0.000171	0.00767
HN-SMG-Mucus	HN-3	12.RAW (F013062)	Mitochondrial inner membrane protein OS=Homo sapiens GN=IMMT PE=1 SV=1	Q16891	SwissProt_2012_09.fasta	83679	0.998	2	2	2	0.000171	0.0369
HN-SMG-Mucus	HN-3	12.RAW (F013062)	Myosin-14 OS=Homo sapiens GN=MYH14 PE=1 SV=2	Q7Z406	SwissProt_2012_09.fasta	227873	1	3	3	3	0.000256	0.0276
HN-SMG-Mucus	HN-3	12.RAW (F013062)	LETM1 and EF-hand domain-containing protein 1, mitochondrial OS=Homo sapiens GN=LETM1 PE=1 SV=1	O95202	SwissProt_2012_09.fasta	83355.9	0.998	2	2	2	0.000171	0.0325
HN-SMG-Mucus	HN-3	12.RAW (F013062)	ADP/ATP translocase 2 OS=Homo sapiens GN=SLC25A5 PE=1 SV=7	P05141	SwissProt_2012_09.fasta	32853.5	0.998	2	2	3	0.000256	0.0772
HN-SMG-Mucus	HN-3	12.RAW (F013062)	Myosin light polypeptide 6 OS=Homo sapiens GN=MYL6 PE=1 SV=2	P60660	SwissProt_2012_09.fasta	16929.8	1	6	6	6	0.000513	0.424
HN-SMG-Mucus	HN-3	12.RAW (F013062)	Protein SET OS=Homo sapiens GN=SET PE=1 SV=3	Q01105	SwissProt_2012_09.fasta	33489.4	1	3	3	3	0.000256	0.121
HN-SMG-Mucus	HN-3	12.RAW (F013062)	Dynactin subunit 2 OS=Homo sapiens GN=DCTN2 PE=1 SV=4	Q13561	SwissProt_2012_09.fasta	44231.7	0.998	2	2	2	0.000171	0.0848
HN-SMG-Mucus	HN-3	12.RAW (F013062)	Heat shock protein HSP 90-alpha OS=Homo sapiens GN=HSP90AA1 PE=1 SV=5	P07900	SwissProt_2012_09.fasta	84663.2	0.999	2	3	4	0.000342	0.0779
HN-SMG-Mucus	HN-3	12.RAW (F013062)	Poly(rC)-binding protein 1 OS=Homo sapiens GN=PCBP1 PE=1 SV=2	Q15365	SwissProt_2012_09.fasta	37498.2	1	3	3	3	0.000256	0.107
HN-SMG-Mucus	HN-3	12.RAW (F013062)	Neuroblast differentiation-associated protein AHNAK OS=Homo sapiens GN=AHNAK PE=1 SV=2	Q09666	SwissProt_2012_09.fasta	629104	0.998	3	3	3	0.000256	0.00357
HN-SMG-Mucus	HN-3	12.RAW (F013062)	Gelsolin OS=Homo sapiens GN=GSN PE=1 SV=1	P06396	SwissProt_2012_09.fasta	85697.8	1	4	4	4	0.000342	0.0627
HN-SMG-Mucus	HN-3	12.RAW (F013062)	6-phosphogluconate dehydrogenase, decarboxylating OS=Homo sapiens GN=PGD PE=1 SV=3	P52209	SwissProt_2012_09.fasta	53141.9	0.998	2	2	2	0.000171	0.0518
HN-SMG-Mucus	HN-3	12.RAW (F013062)	Fatty aldehyde dehydrogenase OS=Homo sapiens GN=ALDH3A2 PE=1 SV=1	P51648	SwissProt_2012_09.fasta	54849.8	0.998	2	3	3	0.000256	0.0598
HN-SMG-Mucus	HN-3	12.RAW (F013062)	Fatty acid-binding protein, epidermal OS=Homo sapiens GN=FABP5 PE=1 SV=3	Q01469	SwissProt_2012_09.fasta	15164.4	0.998	2	3	3	0.000256	0.17
HN-SMG-Mucus	HN-3	12.RAW (F013062)	Lactotransferrin OS=Homo sapiens GN=LTF PE=1 SV=6	P02788	SwissProt_2012_09.fasta	78182.3	1	19	26	73	0.00624	0.349
HN-SMG-Mucus	HN-3	12.RAW (F013062)	Serotransferrin OS=Homo sapiens GN=TF PE=1 SV=3	P02787	SwissProt_2012_09.fasta	77064.3	1	5	6	6	0.000513	0.105
HN-SMG-Mucus	HN-3	12.RAW (F013062)	Proteasome activator complex subunit 2 OS=Homo sapiens GN=PSME2 PE=1 SV=4	Q9UL46	SwissProt_2012_09.fasta	27402.3	0.998	2	2	2	0.000171	0.0921
HN-SMG-Mucus	HN-3	12.RAW (F013062)	Ig alpha-1 chain C region OS=Homo sapiens GN=IGHA1 PE=1 SV=2	P01876	SwissProt_2012_09.fasta	37653.8	0.998	2	2	3	0.000256	0.051
HN-SMG-Mucus	HN-3	12.RAW (F013062)	Pre-mRNA-processing-splicing factor 8 OS=Homo sapiens GN=PRPF8 PE=1 SV=2	Q6P2Q9	SwissProt_2012_09.fasta	273609	0.998	2	2	2	0.000171	0.0163
HN-SMG-Mucus	HN-3	12.RAW (F013062)	Serum albumin OS=Homo sapiens GN=ALB PE=1 SV=2	P02768	SwissProt_2012_09.fasta	69366.9	1	12	12	16	0.00137	0.207
HN-SMG-Mucus	HN-3	12.RAW (F013062)	Ig gamma-1 chain C region OS=Homo sapiens GN=IGHG1 PE=1 SV=1	P01857	SwissProt_2012_09.fasta	36105	1	5	5	7	0.000598	0.227
HN-SMG-Mucus	HN-3	12.RAW (F013062)	ATP-binding cassette sub-family D member 3 OS=Homo sapiens GN=ABCD3 PE=1 SV=1	P28288	SwissProt_2012_09.fasta	75479.2	0.998	2	2	2	0.000171	0.0561
HN-SMG-Mucus	HN-3	12.RAW (F013062)	Ezrin OS=Homo sapiens GN=EZR PE=1 SV=4	P15311	SwissProt_2012_09.fasta	69414.7	1	3	3	4	0.000342	0.099
HN-SMG-Mucus	HN-3	12.RAW (F013062)	Beta-2-glycoprotein 1 OS=Homo sapiens GN=APOH PE=1 SV=3	P02749	SwissProt_2012_09.fasta	38298.5	0.998	2	2	2	0.000171	0.0696
HN-SMG-Mucus	HN-3	12.RAW (F013062)	Protein disulfide-isomerase OS=Homo sapiens GN=P4HB PE=1 SV=3	P07237	SwissProt_2012_09.fasta	57118.1	1	3	3	3	0.000256	0.0945
HN-SMG-Mucus	HN-3	12.RAW (F013062)	60 kDa heat shock protein, mitochondrial OS=Homo sapiens GN=HSPD1 PE=1 SV=2	P10809	SwissProt_2012_09.fasta	61055.7	1	9	11	11	0.00094	0.197
HN-SMG-Mucus	HN-3	12.RAW (F013062)	Ig kappa chain C region OS=Homo sapiens GN=IGKC PE=1 SV=1	P01834	SwissProt_2012_09.fasta	11608.6	1	3	3	5	0.000427	0.509
HN-SMG-Mucus	HN-3	12.RAW (F013062)	Polymeric immunoglobulin receptor OS=Homo sapiens GN=PIGR PE=1 SV=4	P01833	SwissProt_2012_09.fasta	83283.4	1	9	9	9	0.000769	0.145
HN-SMG-Mucus	HN-3	12.RAW (F013062)	Annexin A7 OS=Homo sapiens GN=ANXA7 PE=1 SV=3	P20073	SwissProt_2012_09.fasta	52740.5	0.998	2	2	2	0.000171	0.0533
HN-SMG-Mucus	HN-3	12.RAW (F013062)	Collagen alpha-2(I) chain OS=Homo sapiens GN=COL1A2 PE=1 SV=7	P08123	SwissProt_2012_09.fasta	129315	0.998	2	2	2	0.000171	0.0242
HN-SMG-Mucus	HN-3	12.RAW (F013062)	Proteasome subunit alpha type-7 OS=Homo sapiens GN=PSMA7 PE=1 SV=1	O14818	SwissProt_2012_09.fasta	27887.2	0.998	2	2	2	0.000171	0.117
HN-SMG-Mucus	HN-3	12.RAW (F013062)	40S ribosomal protein S19 OS=Homo sapiens GN=RPS19 PE=1 SV=2	P39019	SwissProt_2012_09.fasta	16060.5	0.997	2	2	2	0.000171	0.152
HN-SMG-Mucus	HN-3	12.RAW (F013062)	Electron transfer flavoprotein subunit beta OS=Homo sapiens GN=ETFB PE=1 SV=3	P38117	SwissProt_2012_09.fasta	27843.6	0.999	2	2	2	0.000171	0.0824
HN-SMG-Mucus	HN-3	12.RAW (F013062)	Alpha-1-antichymotrypsin OS=Homo sapiens GN=SERPINA3 PE=1 SV=2	P01011	SwissProt_2012_09.fasta	47653	0.998	2	3	5	0.000427	0.0875
HN-SMG-Mucus	HN-3	12.RAW (F013062)	Histone H2A type 1 OS=Homo sapiens GN=HIST1H2AG PE=1 SV=2	P0C0S8,Q16777,Q6FI13,Q96KK5,Q99878,Q9BTM1	SwissProt_2012_09.fasta	13906.8	1	3	3	3	0.000256	0.269
HN-SMG-Mucus	HN-3	12.RAW (F013062)	Prelamin-A/C OS=Homo sapiens GN=LMNA PE=1 SV=1	P02545	SwissProt_2012_09.fasta	74140.7	1	6	6	6	0.000513	0.107
HN-SMG-Mucus	HN-3	12.RAW (F013062)	Alpha-1-acid glycoprotein 1 OS=Homo sapiens GN=ORM1 PE=1 SV=1	P02763	SwissProt_2012_09.fasta	23512.1	1	3	3	3	0.000256	0.154
HN-SMG-Mucus	HN-3	12.RAW (F013062)	Cathepsin G OS=Homo sapiens GN=CTSG PE=1 SV=2	P08311	SwissProt_2012_09.fasta	28837.5	0.998	2	2	2	0.000171	0.0706
HN-SMG-Mucus	HN-3	12.RAW (F013062)	Antileukoproteinase OS=Homo sapiens GN=SLPI PE=1 SV=2	P03973	SwissProt_2012_09.fasta	14326	1	3	4	5	0.000427	0.333
HN-SMG-Mucus	HN-3	12.RAW (F013062)	Keratin, type II cytoskeletal 8 OS=Homo sapiens GN=KRT8 PE=1 SV=7	P05787	SwissProt_2012_09.fasta	53706.2	1	11	15	17	0.00145	0.267
HN-SMG-Mucus	HN-3	12.RAW (F013062)	Ornithine aminotransferase, mitochondrial OS=Homo sapiens GN=OAT PE=1 SV=1	P04181	SwissProt_2012_09.fasta	48536.2	1	3	3	3	0.000256	0.0752
HN-SMG-Mucus	HN-3	12.RAW (F013062)	Heat shock protein beta-1 OS=Homo sapiens GN=HSPB1 PE=1 SV=2	P04792	SwissProt_2012_09.fasta	22782.6	1	3	3	3	0.000256	0.244
HN-SMG-Mucus	HN-3	12.RAW (F013062)	Proteasome subunit alpha type-6 OS=Homo sapiens GN=PSMA6 PE=1 SV=1	P60900	SwissProt_2012_09.fasta	27399.5	0.998	2	2	2	0.000171	0.102
HN-SMG-Mucus	HN-3	12.RAW (F013062)	Keratin, type I cytoskeletal 18 OS=Homo sapiens GN=KRT18 PE=1 SV=2	P05783	SwissProt_2012_09.fasta	48059	1	5	8	10	0.000854	0.228
HN-SMG-Mucus	HN-3	12.RAW (F013062)	Prothymosin alpha OS=Homo sapiens GN=PTMA PE=1 SV=2	P06454	SwissProt_2012_09.fasta	12202.5	0.998	2	2	2	0.000171	0.117
HN-SMG-Mucus	HN-3	12.RAW (F013062)	IgGFc-binding protein OS=Homo sapiens GN=FCGBP PE=1 SV=3	Q9Y6R7	SwissProt_2012_09.fasta	571983	1	16	17	18	0.00154	0.04
HN-SMG-Mucus	HN-3	12.RAW (F013062)	Tubulin beta chain OS=Homo sapiens GN=TUBB PE=1 SV=2	P07437	SwissProt_2012_09.fasta	49670.6	1	4	4	4	0.000342	0.108
HN-SMG-Mucus	HN-3	12.RAW (F013062)	Heterogeneous nuclear ribonucleoproteins C1/C2 OS=Homo sapiens GN=HNRNPC PE=1 SV=4	P07910	SwissProt_2012_09.fasta	33670.5	0.998	2	2	2	0.000171	0.0817
HN-SMG-Mucus	HN-3	12.RAW (F013062)	Heat shock 70 kDa protein 1A/1B OS=Homo sapiens GN=HSPA1A PE=1 SV=5	P08107	SwissProt_2012_09.fasta	70054	1	6	7	8	0.000683	0.161
HN-SMG-Mucus	HN-3	12.RAW (F013062)	Calcyphosin OS=Homo sapiens GN=CAPS PE=1 SV=1	Q13938	SwissProt_2012_09.fasta	20967.7	0.998	2	2	2	0.000171	0.148
HN-SMG-Mucus	HN-3	12.RAW (F013062)	78 kDa glucose-regulated protein OS=Homo sapiens GN=HSPA5 PE=1 SV=2	P11021	SwissProt_2012_09.fasta	72334.7	1	4	4	4	0.000342	0.0856
HN-SMG-Mucus	HN-3	12.RAW (F013062)	Dolichyl-diphosphooligosaccharide--protein glycosyltransferase subunit 2 OS=Homo sapiens GN=RPN2 PE=1 SV=3	P04844	SwissProt_2012_09.fasta	69284.8	0.998	2	2	2	0.000171	0.0396
HN-SMG-Mucus	HN-3	12.RAW (F013062)	Macrophage-capping protein OS=Homo sapiens GN=CAPG PE=1 SV=2	P40121	SwissProt_2012_09.fasta	38498.9	0.998	2	2	2	0.000171	0.069
HN-SMG-Mucus	HN-3	12.RAW (F013062)	Ribosome-binding protein 1 OS=Homo sapiens GN=RRBP1 PE=1 SV=4	Q9P2E9	SwissProt_2012_09.fasta	152471	0.998	2	2	2	0.000171	0.0191
HN-SMG-Mucus	HN-3	12.RAW (F013062)	Triosephosphate isomerase OS=Homo sapiens GN=TPI1 PE=1 SV=3	P60174	SwissProt_2012_09.fasta	30790.8	1	4	5	6	0.000513	0.224
HN-SMG-Mucus	HN-3	12.RAW (F013062)	Coatomer subunit alpha OS=Homo sapiens GN=COPA PE=1 SV=2	P53621	SwissProt_2012_09.fasta	138349	0.998	2	2	2	0.000171	0.0221
HN-SMG-Mucus	HN-3	12.RAW (F013062)	Translational activator GCN1 OS=Homo sapiens GN=GCN1L1 PE=1 SV=6	Q92616	SwissProt_2012_09.fasta	292764	0.998	2	3	4	0.000342	0.0109
HN-SMG-Mucus	HN-3	12.RAW (F013062)	40S ribosomal protein S6 OS=Homo sapiens GN=RPS6 PE=1 SV=1	P62753	SwissProt_2012_09.fasta	28681.7	0.998	2	2	2	0.000171	0.0803
HN-SMG-Mucus	HN-3	12.RAW (F013062)	Actin, cytoplasmic 2 OS=Homo sapiens GN=ACTG1 PE=1 SV=1	P63261	SwissProt_2012_09.fasta	41793.9	1	4	4	9	0.000769	0.12
HN-SMG-Mucus	HN-3	12.RAW (F013062)	Apolipoprotein D OS=Homo sapiens GN=APOD PE=1 SV=1	P05090	SwissProt_2012_09.fasta	21276.1	0.998	2	2	2	0.000171	0.132
HN-SMG-Mucus	HN-3	12.RAW (F013062)	Keratin, type I cytoskeletal 16 OS=Homo sapiens GN=KRT16 PE=1 SV=4	P08779	SwissProt_2012_09.fasta	51269	1	3	3	3	0.000256	0.209
HN-SMG-Mucus	HN-3	12.RAW (F013062)	Transmembrane protein 109 OS=Homo sapiens GN=TMEM109 PE=1 SV=1	Q9BVC6	SwissProt_2012_09.fasta	26211.2	0.998	2	2	2	0.000171	0.0864
HN-SMG-Mucus	HN-3	12.RAW (F013062)	Transketolase OS=Homo sapiens GN=TKT PE=1 SV=3	P29401	SwissProt_2012_09.fasta	67879.4	1	4	4	4	0.000342	0.0931
HN-SMG-Mucus	HN-3	12.RAW (F013062)	T-complex protein 1 subunit epsilon OS=Homo sapiens GN=CCT5 PE=1 SV=1	P48643	SwissProt_2012_09.fasta	59672.4	0.998	2	2	2	0.000171	0.0481
HN-SMG-Mucus	HN-3	12.RAW (F013062)	Ig lambda-2 chain C regions OS=Homo sapiens GN=IGLC2 PE=1 SV=1	P0CG05,P0CG06	SwissProt_2012_09.fasta	11293.2	0.998	2	2	3	0.000256	0.274
HN-SMG-Mucus	HN-3	12.RAW (F013062)	DNA-dependent protein kinase catalytic subunit OS=Homo sapiens GN=PRKDC PE=1 SV=3	P78527	SwissProt_2012_09.fasta	469096	0.997	2	2	2	0.000171	0.00654
HN-SMG-Mucus	HN-3	12.RAW (F013062)	Annexin A5 OS=Homo sapiens GN=ANXA5 PE=1 SV=2	P08758	SwissProt_2012_09.fasta	35938.6	1	3	3	3	0.000256	0.156
HN-SMG-Mucus	HN-3	12.RAW (F013062)	Desmoplakin OS=Homo sapiens GN=DSP PE=1 SV=3	P15924	SwissProt_2012_09.fasta	331781	1	5	6	6	0.000513	0.0212
HN-SMG-Mucus	HN-3	12.RAW (F013062)	Alpha-actinin-4 OS=Homo sapiens GN=ACTN4 PE=1 SV=2	O43707	SwissProt_2012_09.fasta	104857	1	3	3	3	0.000256	0.0428
HN-SMG-Mucus	HN-3	12.RAW (F013062)	Dolichyl-diphosphooligosaccharide--protein glycosyltransferase 48 kDa subunit OS=Homo sapiens GN=DDOST PE=1 SV=4	P39656	SwissProt_2012_09.fasta	50802.5	0.998	2	2	2	0.000171	0.0548
HN-SMG-Mucus	HN-3	12.RAW (F013062)	Stomatin-like protein 2 OS=Homo sapiens GN=STOML2 PE=1 SV=1	Q9UJZ1	SwissProt_2012_09.fasta	38534.5	0.998	2	2	2	0.000171	0.0871
HN-SMG-Mucus	HN-3	12.RAW (F013062)	Keratin, type II cytoskeletal 7 OS=Homo sapiens GN=KRT7 PE=1 SV=5	P08729	SwissProt_2012_09.fasta	51387.3	1	10	11	11	0.00094	0.256
HN-SMG-Mucus	HN-3	12.RAW (F013062)	Keratin, type I cytoskeletal 19 OS=Homo sapiens GN=KRT19 PE=1 SV=4	P08727	SwissProt_2012_09.fasta	44107.1	1	13	16	26	0.00222	0.385
HN-SMG-Mucus	HN-3	12.RAW (F013062)	Dihydrolipoyl dehydrogenase, mitochondrial OS=Homo sapiens GN=DLD PE=1 SV=2	P09622	SwissProt_2012_09.fasta	54177.5	1	3	4	4	0.000342	0.0747
HN-SMG-Mucus	HN-3	12.RAW (F013062)	Sodium/potassium-transporting ATPase subunit alpha-1 OS=Homo sapiens GN=ATP1A1 PE=1 SV=1	P05023	SwissProt_2012_09.fasta	112900	1	7	8	9	0.000769	0.0938
HN-SMG-Mucus	HN-3	12.RAW (F013062)	Deleted in malignant brain tumors 1 protein OS=Homo sapiens GN=DMBT1 PE=1 SV=2	Q9UGM3	SwissProt_2012_09.fasta	260726	1	9	16	46	0.00393	0.0646
HN-SMG-Mucus	HN-3	12.RAW (F013062)	X-ray repair cross-complementing protein 6 OS=Homo sapiens GN=XRCC6 PE=1 SV=2	P12956	SwissProt_2012_09.fasta	69846.4	0.998	2	2	2	0.000171	0.0345
HN-SMG-Mucus	HN-3	12.RAW (F013062)	Protein disulfide-isomerase A4 OS=Homo sapiens GN=PDIA4 PE=1 SV=2	P13667	SwissProt_2012_09.fasta	72934	0.998	2	2	2	0.000171	0.0403
HN-SMG-Mucus	HN-3	13.RAW (F013064)	Moesin OS=Homo sapiens GN=MSN PE=1 SV=3	P26038	SwissProt_2012_09.fasta	67821.8	1	3	3	3	0.000261	0.0433
HN-SMG-Mucus	HN-3	13.RAW (F013064)	Carbonyl reductase [NADPH] 1 OS=Homo sapiens GN=CBR1 PE=1 SV=3	P16152	SwissProt_2012_09.fasta	30374.8	0.998	2	2	2	0.000174	0.162
HN-SMG-Mucus	HN-3	13.RAW (F013064)	60S acidic ribosomal protein P2 OS=Homo sapiens GN=RPLP2 PE=1 SV=1	P05387	SwissProt_2012_09.fasta	11665.5	0.998	2	2	2	0.000174	0.287
HN-SMG-Mucus	HN-3	13.RAW (F013064)	Fibrinogen gamma chain OS=Homo sapiens GN=FGG PE=1 SV=3	P02679	SwissProt_2012_09.fasta	51513.3	1	4	5	6	0.000523	0.115
HN-SMG-Mucus	HN-3	13.RAW (F013064)	Fibrinogen beta chain OS=Homo sapiens GN=FGB PE=1 SV=2	P02675	SwissProt_2012_09.fasta	55928.6	1	3	3	3	0.000261	0.0774
HN-SMG-Mucus	HN-3	13.RAW (F013064)	Fibrinogen alpha chain OS=Homo sapiens GN=FGA PE=1 SV=2	P02671	SwissProt_2012_09.fasta	94973.4	1	3	3	3	0.000261	0.0612
HN-SMG-Mucus	HN-3	13.RAW (F013064)	Peroxiredoxin-1 OS=Homo sapiens GN=PRDX1 PE=1 SV=1	Q06830	SwissProt_2012_09.fasta	22110.9	0.998	2	2	2	0.000174	0.0754
HN-SMG-Mucus	HN-3	13.RAW (F013064)	Mucin-5AC (Fragments) OS=Homo sapiens GN=MUC5AC PE=1 SV=3	P98088	SwissProt_2012_09.fasta	526585	1	3	4	4	0.000349	0.0133
HN-SMG-Mucus	HN-3	13.RAW (F013064)	Plectin OS=Homo sapiens GN=PLEC PE=1 SV=3	Q15149	SwissProt_2012_09.fasta	531784	1	3	3	3	0.000261	0.00982
HN-SMG-Mucus	HN-3	13.RAW (F013064)	Glyceraldehyde-3-phosphate dehydrogenase OS=Homo sapiens GN=GAPDH PE=1 SV=3	P04406	SwissProt_2012_09.fasta	36053.4	0.998	2	2	2	0.000174	0.0657
HN-SMG-Mucus	HN-3	13.RAW (F013064)	Heat shock protein beta-1 OS=Homo sapiens GN=HSPB1 PE=1 SV=2	P04792	SwissProt_2012_09.fasta	22782.6	1	3	5	6	0.000523	0.278
HN-SMG-Mucus	HN-3	13.RAW (F013064)	Calcyphosin OS=Homo sapiens GN=CAPS PE=1 SV=1	Q13938	SwissProt_2012_09.fasta	20967.7	0.998	2	2	2	0.000174	0.0952
HN-SMG-Mucus	HN-3	13.RAW (F013064)	Keratin, type I cytoskeletal 9 OS=Homo sapiens GN=KRT9 PE=1 SV=3	P35527	SwissProt_2012_09.fasta	62065.9	1	7	7	7	0.00061	0.223
HN-SMG-Mucus	HN-3	13.RAW (F013064)	Pyruvate kinase isozymes M1/M2 OS=Homo sapiens GN=PKM PE=1 SV=4	P14618	SwissProt_2012_09.fasta	57937.5	1	3	4	5	0.000436	0.104
HN-SMG-Mucus	HN-3	13.RAW (F013064)	Metallothionein-2 OS=Homo sapiens GN=MT2A PE=1 SV=1	P02795,P13640,P80297	SwissProt_2012_09.fasta	6067.6	0.998	2	2	2	0.000174	0.328
HN-SMG-Mucus	HN-3	13.RAW (F013064)	Keratin, type I cytoskeletal 17 OS=Homo sapiens GN=KRT17 PE=1 SV=2	Q04695	SwissProt_2012_09.fasta	48106.7	1	3	3	3	0.000261	0.148
HN-SMG-Mucus	HN-3	13.RAW (F013064)	Complement C3 OS=Homo sapiens GN=C3 PE=1 SV=2	P01024	SwissProt_2012_09.fasta	187149	1	4	4	4	0.000349	0.0391
HN-SMG-Mucus	HN-3	13.RAW (F013064)	Elongation factor 1-alpha 1 OS=Homo sapiens GN=EEF1A1 PE=1 SV=1	P68104,Q5VTE0	SwissProt_2012_09.fasta	50141.2	1	3	4	4	0.000349	0.13
HN-SMG-Mucus	HN-3	13.RAW (F013064)	Cathepsin G OS=Homo sapiens GN=CTSG PE=1 SV=2	P08311	SwissProt_2012_09.fasta	28837.5	1	3	3	3	0.000261	0.0941
HN-SMG-Mucus	HN-3	13.RAW (F013064)	Peptidyl-prolyl cis-trans isomerase A OS=Homo sapiens GN=PPIA PE=1 SV=2	P62937	SwissProt_2012_09.fasta	18012.9	1	3	3	3	0.000261	0.164
HN-SMG-Mucus	HN-3	13.RAW (F013064)	Calreticulin OS=Homo sapiens GN=CALR PE=1 SV=1	P27797	SwissProt_2012_09.fasta	48142.9	1	4	5	5	0.000436	0.213
HN-SMG-Mucus	HN-3	13.RAW (F013064)	Protein disulfide-isomerase A3 OS=Homo sapiens GN=PDIA3 PE=1 SV=4	P30101	SwissProt_2012_09.fasta	56784.6	1	3	5	5	0.000436	0.0931
HN-SMG-Mucus	HN-3	13.RAW (F013064)	Calpain-2 catalytic subunit OS=Homo sapiens GN=CAPN2 PE=1 SV=6	P17655	SwissProt_2012_09.fasta	79999.1	0.998	2	2	2	0.000174	0.05
HN-SMG-Mucus	HN-3	13.RAW (F013064)	Annexin A1 OS=Homo sapiens GN=ANXA1 PE=1 SV=2	P04083	SwissProt_2012_09.fasta	38715.9	1	3	4	4	0.000349	0.147
HN-SMG-Mucus	HN-3	13.RAW (F013064)	Vimentin OS=Homo sapiens GN=VIM PE=1 SV=4	P08670	SwissProt_2012_09.fasta	53652.7	1	3	3	3	0.000261	0.0901
HN-SMG-Mucus	HN-3	13.RAW (F013064)	Fructose-bisphosphate aldolase A OS=Homo sapiens GN=ALDOA PE=1 SV=2	P04075	SwissProt_2012_09.fasta	39420.6	0.997	2	2	2	0.000174	0.0412
HN-SMG-Mucus	HN-3	13.RAW (F013064)	ATP synthase subunit beta, mitochondrial OS=Homo sapiens GN=ATP5B PE=1 SV=3	P06576	SwissProt_2012_09.fasta	56560.6	1	3	5	7	0.00061	0.1
HN-SMG-Mucus	HN-3	13.RAW (F013064)	40S ribosomal protein S11 OS=Homo sapiens GN=RPS11 PE=1 SV=3	P62280	SwissProt_2012_09.fasta	18431.3	0.998	2	2	2	0.000174	0.177
HN-SMG-Mucus	HN-3	13.RAW (F013064)	Neutrophil defensin 1 OS=Homo sapiens GN=DEFA1 PE=1 SV=1	P59665,P59666	SwissProt_2012_09.fasta	10201	0.998	2	2	6	0.000523	0.191
HN-SMG-Mucus	HN-3	13.RAW (F013064)	Mucin-5B OS=Homo sapiens GN=MUC5B PE=1 SV=3	Q9HC84	SwissProt_2012_09.fasta	596324	1	14	17	20	0.00174	0.0345
HN-SMG-Mucus	HN-3	13.RAW (F013064)	Very long-chain specific acyl-CoA dehydrogenase, mitochondrial OS=Homo sapiens GN=ACADVL PE=1 SV=1	P49748	SwissProt_2012_09.fasta	70391.6	0.998	2	2	2	0.000174	0.0534
HN-SMG-Mucus	HN-3	13.RAW (F013064)	Catenin alpha-1 OS=Homo sapiens GN=CTNNA1 PE=1 SV=1	P35221	SwissProt_2012_09.fasta	100073	0.997	2	2	2	0.000174	0.0497
HN-SMG-Mucus	HN-3	13.RAW (F013064)	Keratin, type II cytoskeletal 6A OS=Homo sapiens GN=KRT6A PE=1 SV=3	P02538	SwissProt_2012_09.fasta	60046.4	1	8	8	9	0.000784	0.22
HN-SMG-Mucus	HN-3	13.RAW (F013064)	Keratin, type I cytoskeletal 14 OS=Homo sapiens GN=KRT14 PE=1 SV=4	P02533	SwissProt_2012_09.fasta	51562.5	0.998	2	2	2	0.000174	0.15
HN-SMG-Mucus	HN-3	13.RAW (F013064)	Haptoglobin OS=Homo sapiens GN=HP PE=1 SV=1	P00738	SwissProt_2012_09.fasta	45204.9	1	3	4	4	0.000349	0.0911
HN-SMG-Mucus	HN-3	13.RAW (F013064)	Clathrin heavy chain 1 OS=Homo sapiens GN=CLTC PE=1 SV=5	Q00610	SwissProt_2012_09.fasta	191619	1	3	3	3	0.000261	0.0316
HN-SMG-Mucus	HN-3	13.RAW (F013064)	Myoferlin OS=Homo sapiens GN=MYOF PE=1 SV=1	Q9NZM1	SwissProt_2012_09.fasta	234716	0.998	2	2	2	0.000174	0.0165
HN-SMG-Mucus	HN-3	13.RAW (F013064)	Complement factor H OS=Homo sapiens GN=CFH PE=1 SV=4	P08603	SwissProt_2012_09.fasta	139096	0.998	2	2	2	0.000174	0.0236
HN-SMG-Mucus	HN-3	13.RAW (F013064)	Lysozyme C OS=Homo sapiens GN=LYZ PE=1 SV=1	P61626	SwissProt_2012_09.fasta	16536.9	1	3	5	7	0.00061	0.297
HN-SMG-Mucus	HN-3	13.RAW (F013064)	Aconitate hydratase, mitochondrial OS=Homo sapiens GN=ACO2 PE=1 SV=2	Q99798	SwissProt_2012_09.fasta	85428	0.998	2	2	2	0.000174	0.0308
HN-SMG-Mucus	HN-3	13.RAW (F013064)	Alpha-actinin-4 OS=Homo sapiens GN=ACTN4 PE=1 SV=2	O43707	SwissProt_2012_09.fasta	104857	1	6	6	6	0.000523	0.0856
HN-SMG-Mucus	HN-3	13.RAW (F013064)	Proteasome activator complex subunit 1 OS=Homo sapiens GN=PSME1 PE=1 SV=1	Q06323	SwissProt_2012_09.fasta	28723.9	0.998	2	2	2	0.000174	0.145
HN-SMG-Mucus	HN-3	13.RAW (F013064)	Galectin-3-binding protein OS=Homo sapiens GN=LGALS3BP PE=1 SV=1	Q08380	SwissProt_2012_09.fasta	65332.1	0.998	2	2	2	0.000174	0.0359
HN-SMG-Mucus	HN-3	13.RAW (F013064)	Keratin, type II cytoskeletal 5 OS=Homo sapiens GN=KRT5 PE=1 SV=3	P13647	SwissProt_2012_09.fasta	62379.6	1	10	10	12	0.00105	0.159
HN-SMG-Mucus	HN-3	13.RAW (F013064)	Keratin, type I cytoskeletal 13 OS=Homo sapiens GN=KRT13 PE=1 SV=4	P13646	SwissProt_2012_09.fasta	49589.3	1	4	4	4	0.000349	0.14
HN-SMG-Mucus	HN-3	13.RAW (F013064)	Myosin-9 OS=Homo sapiens GN=MYH9 PE=1 SV=4	P35579	SwissProt_2012_09.fasta	226538	1	2	2	2	0.000174	0.0117
HN-SMG-Mucus	HN-3	13.RAW (F013064)	Elongation factor 2 OS=Homo sapiens GN=EEF2 PE=1 SV=4	P13639	SwissProt_2012_09.fasta	95340.1	1	4	4	4	0.000349	0.0443
HN-SMG-Mucus	HN-3	13.RAW (F013064)	Serum amyloid A-1 protein OS=Homo sapiens GN=SAA1 PE=1 SV=1	P0DJI8	SwissProt_2012_09.fasta	13532.6	0.998	2	2	2	0.000174	0.238
HN-SMG-Mucus	HN-3	13.RAW (F013064)	Annexin A2 OS=Homo sapiens GN=ANXA2 PE=1 SV=2	P07355	SwissProt_2012_09.fasta	38606.1	1	6	6	6	0.000523	0.245
HN-SMG-Mucus	HN-3	13.RAW (F013064)	Keratin, type I cytoskeletal 15 OS=Homo sapiens GN=KRT15 PE=1 SV=3	P19012	SwissProt_2012_09.fasta	49212.9	1	3	4	4	0.000349	0.189
HN-SMG-Mucus	HN-3	13.RAW (F013064)	Neutrophil gelatinase-associated lipocalin OS=Homo sapiens GN=LCN2 PE=1 SV=2	P80188	SwissProt_2012_09.fasta	22588.9	0.998	2	2	2	0.000174	0.096
HN-SMG-Mucus	HN-3	13.RAW (F013064)	Azurocidin OS=Homo sapiens GN=AZU1 PE=1 SV=3	P20160	SwissProt_2012_09.fasta	26885.6	0.998	2	2	2	0.000174	0.0677
HN-SMG-Mucus	HN-3	13.RAW (F013064)	Hypoxia up-regulated protein 1 OS=Homo sapiens GN=HYOU1 PE=1 SV=1	Q9Y4L1	SwissProt_2012_09.fasta	111337	0.998	2	2	2	0.000174	0.023
HN-SMG-Mucus	HN-3	13.RAW (F013064)	Ras-related protein Rab-1A OS=Homo sapiens GN=RAB1A PE=1 SV=3	P62820	SwissProt_2012_09.fasta	22678.5	0.998	2	2	2	0.000174	0.0927
HN-SMG-Mucus	HN-3	13.RAW (F013064)	Histone H4 OS=Homo sapiens GN=HIST1H4A PE=1 SV=2	P62805	SwissProt_2012_09.fasta	11367.7	1	2	2	3	0.000261	0.214
HN-SMG-Mucus	HN-3	13.RAW (F013064)	BPI fold-containing family B member 1 OS=Homo sapiens GN=BPIFB1 PE=2 SV=1	Q8TDL5	SwissProt_2012_09.fasta	52443.8	1	10	12	28	0.00244	0.256
HN-SMG-Mucus	HN-3	13.RAW (F013064)	Glutamate dehydrogenase 1, mitochondrial OS=Homo sapiens GN=GLUD1 PE=1 SV=2	P00367	SwissProt_2012_09.fasta	61399.7	0.999	2	2	2	0.000174	0.052
HN-SMG-Mucus	HN-3	13.RAW (F013064)	40S ribosomal protein S9 OS=Homo sapiens GN=RPS9 PE=1 SV=3	P46781	SwissProt_2012_09.fasta	22592.5	0.998	2	2	2	0.000174	0.0876
HN-SMG-Mucus	HN-3	13.RAW (F013064)	Fatty acid synthase OS=Homo sapiens GN=FASN PE=1 SV=3	P49327	SwissProt_2012_09.fasta	273427	1	3	3	4	0.000349	0.0159
HN-SMG-Mucus	HN-3	13.RAW (F013064)	Retinal dehydrogenase 1 OS=Homo sapiens GN=ALDH1A1 PE=1 SV=2	P00352	SwissProt_2012_09.fasta	54862.8	1	4	4	4	0.000349	0.144
HN-SMG-Mucus	HN-3	13.RAW (F013064)	Sarcoplasmic/endoplasmic reticulum calcium ATPase 2 OS=Homo sapiens GN=ATP2A2 PE=1 SV=1	P16615	SwissProt_2012_09.fasta	114759	0.998	2	2	2	0.000174	0.0298
HN-SMG-Mucus	HN-3	13.RAW (F013064)	L-lactate dehydrogenase A chain OS=Homo sapiens GN=LDHA PE=1 SV=2	P00338	SwissProt_2012_09.fasta	36689.2	0.998	2	2	2	0.000174	0.0873
HN-SMG-Mucus	HN-3	13.RAW (F013064)	Major vault protein OS=Homo sapiens GN=MVP PE=1 SV=4	Q14764	SwissProt_2012_09.fasta	99326	0.998	2	2	2	0.000174	0.0549
HN-SMG-Mucus	HN-3	13.RAW (F013064)	Ras-related protein Rap-1b OS=Homo sapiens GN=RAP1B PE=1 SV=1	P61224	SwissProt_2012_09.fasta	20824.9	0.998	2	2	2	0.000174	0.109
HN-SMG-Mucus	HN-3	13.RAW (F013064)	Serpin B3 OS=Homo sapiens GN=SERPINB3 PE=1 SV=2	P29508	SwissProt_2012_09.fasta	44565.9	0.998	2	2	2	0.000174	0.0744
HN-SMG-Mucus	HN-3	13.RAW (F013064)	Ras GTPase-activating-like protein IQGAP1 OS=Homo sapiens GN=IQGAP1 PE=1 SV=1	P46940	SwissProt_2012_09.fasta	189259	0.998	2	2	2	0.000174	0.0241
HN-SMG-Mucus	HN-3	13.RAW (F013064)	Keratin, type II cytoskeletal 1 OS=Homo sapiens GN=KRT1 PE=1 SV=6	P04264	SwissProt_2012_09.fasta	66040.3	1	4	4	4	0.000349	0.0854
HN-SMG-Mucus	HN-3	13.RAW (F013064)	Isocitrate dehydrogenase [NADP], mitochondrial OS=Homo sapiens GN=IDH2 PE=1 SV=2	P48735	SwissProt_2012_09.fasta	50910.4	0.998	2	2	2	0.000174	0.0575
HN-SMG-Mucus	HN-3	13.RAW (F013064)	ADP/ATP translocase 2 OS=Homo sapiens GN=SLC25A5 PE=1 SV=7	P05141	SwissProt_2012_09.fasta	32853.5	1	2	2	2	0.000174	0.0537
HN-SMG-Mucus	HN-3	13.RAW (F013064)	Myosin light polypeptide 6 OS=Homo sapiens GN=MYL6 PE=1 SV=2	P60660	SwissProt_2012_09.fasta	16929.8	1	3	3	3	0.000261	0.205
HN-SMG-Mucus	HN-3	13.RAW (F013064)	Gelsolin OS=Homo sapiens GN=GSN PE=1 SV=1	P06396	SwissProt_2012_09.fasta	85697.8	1	3	3	3	0.000261	0.0435
HN-SMG-Mucus	HN-3	13.RAW (F013064)	6-phosphogluconate dehydrogenase, decarboxylating OS=Homo sapiens GN=PGD PE=1 SV=3	P52209	SwissProt_2012_09.fasta	53141.9	0.998	2	2	2	0.000174	0.0828
HN-SMG-Mucus	HN-3	13.RAW (F013064)	Lactotransferrin OS=Homo sapiens GN=LTF PE=1 SV=6	P02788	SwissProt_2012_09.fasta	78182.3	1	15	18	26	0.00227	0.277
HN-SMG-Mucus	HN-3	13.RAW (F013064)	Ig alpha-1 chain C region OS=Homo sapiens GN=IGHA1 PE=1 SV=2	P01876	SwissProt_2012_09.fasta	37653.8	1	3	3	3	0.000261	0.11
HN-SMG-Mucus	HN-3	13.RAW (F013064)	Serum albumin OS=Homo sapiens GN=ALB PE=1 SV=2	P02768	SwissProt_2012_09.fasta	69366.9	1	10	14	26	0.00227	0.21
HN-SMG-Mucus	HN-3	13.RAW (F013064)	Polymeric immunoglobulin receptor OS=Homo sapiens GN=PIGR PE=1 SV=4	P01833	SwissProt_2012_09.fasta	83283.4	1	8	8	10	0.000871	0.17
HN-SMG-Mucus	HN-3	13.RAW (F013064)	Heat shock 70 kDa protein 1A/1B OS=Homo sapiens GN=HSPA1A PE=1 SV=5	P08107	SwissProt_2012_09.fasta	70054	0.999	2	3	3	0.000261	0.0624
HN-SMG-Mucus	HN-3	13.RAW (F013064)	Ceruloplasmin OS=Homo sapiens GN=CP PE=1 SV=1	P00450	SwissProt_2012_09.fasta	122208	1	4	5	5	0.000436	0.0789
HN-SMG-Mucus	HN-3	13.RAW (F013064)	Alpha-1-antichymotrypsin OS=Homo sapiens GN=SERPINA3 PE=1 SV=2	P01011	SwissProt_2012_09.fasta	47653	1	3	3	3	0.000261	0.0638
HN-SMG-Mucus	HN-3	13.RAW (F013064)	Prelamin-A/C OS=Homo sapiens GN=LMNA PE=1 SV=1	P02545	SwissProt_2012_09.fasta	74140.7	1	3	3	3	0.000261	0.0377
HN-SMG-Mucus	HN-3	13.RAW (F013064)	Keratin, type II cytoskeletal 8 OS=Homo sapiens GN=KRT8 PE=1 SV=7	P05787	SwissProt_2012_09.fasta	53706.2	0.999	2	2	2	0.000174	0.0766
HN-SMG-Mucus	HN-3	13.RAW (F013064)	Keratin, type I cytoskeletal 18 OS=Homo sapiens GN=KRT18 PE=1 SV=2	P05783	SwissProt_2012_09.fasta	48059	1	3	3	4	0.000349	0.149
HN-SMG-Mucus	HN-3	13.RAW (F013064)	Actin, cytoplasmic 2 OS=Homo sapiens GN=ACTG1 PE=1 SV=1	P63261	SwissProt_2012_09.fasta	41793.9	1	3	4	5	0.000436	0.149
HN-SMG-Mucus	HN-3	13.RAW (F013064)	Antileukoproteinase OS=Homo sapiens GN=SLPI PE=1 SV=2	P03973	SwissProt_2012_09.fasta	14326	1	4	5	5	0.000436	0.402
HN-SMG-Mucus	HN-3	13.RAW (F013064)	IgGFc-binding protein OS=Homo sapiens GN=FCGBP PE=1 SV=3	Q9Y6R7	SwissProt_2012_09.fasta	571983	1	8	9	10	0.000871	0.0224
HN-SMG-Mucus	HN-3	13.RAW (F013064)	Neutral alpha-glucosidase AB OS=Homo sapiens GN=GANAB PE=1 SV=3	Q14697	SwissProt_2012_09.fasta	106876	0.999	2	2	2	0.000174	0.0318
HN-SMG-Mucus	HN-3	13.RAW (F013064)	Macrophage-capping protein OS=Homo sapiens GN=CAPG PE=1 SV=2	P40121	SwissProt_2012_09.fasta	38498.9	0.998	2	2	2	0.000174	0.138
HN-SMG-Mucus	HN-3	13.RAW (F013064)	Triosephosphate isomerase OS=Homo sapiens GN=TPI1 PE=1 SV=3	P60174	SwissProt_2012_09.fasta	30790.8	0.998	2	2	2	0.000174	0.129
HN-SMG-Mucus	HN-3	13.RAW (F013064)	Actin-related protein 3 OS=Homo sapiens GN=ACTR3 PE=1 SV=3	P61158	SwissProt_2012_09.fasta	47371.9	0.998	2	3	3	0.000261	0.124
HN-SMG-Mucus	HN-3	13.RAW (F013064)	Keratin, type I cytoskeletal 24 OS=Homo sapiens GN=KRT24 PE=1 SV=1	Q2M2I5	SwissProt_2012_09.fasta	55088.5	0.998	2	2	2	0.000174	0.061
HN-SMG-Mucus	HN-3	13.RAW (F013064)	Heterogeneous nuclear ribonucleoproteins A2/B1 OS=Homo sapiens GN=HNRNPA2B1 PE=1 SV=2	P22626	SwissProt_2012_09.fasta	37430.3	1	3	3	3	0.000261	0.0935
HN-SMG-Mucus	HN-3	13.RAW (F013064)	Citrate synthase, mitochondrial OS=Homo sapiens GN=CS PE=1 SV=2	O75390	SwissProt_2012_09.fasta	51713.8	0.997	2	2	2	0.000174	0.0386
HN-SMG-Mucus	HN-3	13.RAW (F013064)	Desmoplakin OS=Homo sapiens GN=DSP PE=1 SV=3	P15924	SwissProt_2012_09.fasta	331781	0.995	2	2	2	0.000174	0.00906
HN-SMG-Mucus	HN-3	13.RAW (F013064)	Phosphoglycerate kinase 1 OS=Homo sapiens GN=PGK1 PE=1 SV=3	P00558	SwissProt_2012_09.fasta	44615.3	0.998	2	2	2	0.000174	0.106
HN-SMG-Mucus	HN-3	13.RAW (F013064)	Filamin-B OS=Homo sapiens GN=FLNB PE=1 SV=2	O75369	SwissProt_2012_09.fasta	278159	1	3	3	3	0.000261	0.0223
HN-SMG-Mucus	HN-3	13.RAW (F013064)	Keratin, type II cytoskeletal 7 OS=Homo sapiens GN=KRT7 PE=1 SV=5	P08729	SwissProt_2012_09.fasta	51387.3	1	3	3	3	0.000261	0.0981
HN-SMG-Mucus	HN-3	13.RAW (F013064)	Keratin, type I cytoskeletal 19 OS=Homo sapiens GN=KRT19 PE=1 SV=4	P08727	SwissProt_2012_09.fasta	44107.1	1	13	16	21	0.00183	0.34
HN-SMG-Mucus	HN-3	13.RAW (F013064)	Heat shock cognate 71 kDa protein OS=Homo sapiens GN=HSPA8 PE=1 SV=1	P11142	SwissProt_2012_09.fasta	70899.8	1	3	3	3	0.000261	0.0805
HN-SMG-Mucus	HN-3	13.RAW (F013064)	Deleted in malignant brain tumors 1 protein OS=Homo sapiens GN=DMBT1 PE=1 SV=2	Q9UGM3	SwissProt_2012_09.fasta	260726	1	5	6	6	0.000523	0.0261
HN-SMG-Mucus	HN-3	14.RAW (F013065)	Annexin A2 OS=Homo sapiens GN=ANXA2 PE=1 SV=2	P07355	SwissProt_2012_09.fasta	38606.1	1	4	5	5	0.000477	0.159
HN-SMG-Mucus	HN-3	14.RAW (F013065)	Serum albumin OS=Homo sapiens GN=ALB PE=1 SV=2	P02768	SwissProt_2012_09.fasta	69366.9	1	3	4	6	0.000572	0.0837
HN-SMG-Mucus	HN-3	14.RAW (F013065)	Alpha-actinin-4 OS=Homo sapiens GN=ACTN4 PE=1 SV=2	O43707	SwissProt_2012_09.fasta	104857	0.998	2	2	2	0.000191	0.0329
HN-SMG-Mucus	HN-3	14.RAW (F013065)	Fibrinogen beta chain OS=Homo sapiens GN=FGB PE=1 SV=2	P02675	SwissProt_2012_09.fasta	55928.6	0.998	2	4	4	0.000381	0.0794
HN-SMG-Mucus	HN-3	14.RAW (F013065)	Mucin-5B OS=Homo sapiens GN=MUC5B PE=1 SV=3	Q9HC84	SwissProt_2012_09.fasta	596324	1	8	11	12	0.00114	0.0227
HN-SMG-Mucus	HN-3	14.RAW (F013065)	Polymeric immunoglobulin receptor OS=Homo sapiens GN=PIGR PE=1 SV=4	P01833	SwissProt_2012_09.fasta	83283.4	1	3	3	3	0.000286	0.0746
HN-SMG-Mucus	HN-3	14.RAW (F013065)	Aconitate hydratase, mitochondrial OS=Homo sapiens GN=ACO2 PE=1 SV=2	Q99798	SwissProt_2012_09.fasta	85428	1	3	3	3	0.000286	0.0667
HN-SMG-Mucus	HN-3	14.RAW (F013065)	Aspartate aminotransferase, mitochondrial OS=Homo sapiens GN=GOT2 PE=1 SV=3	P00505	SwissProt_2012_09.fasta	47518.6	0.998	2	3	3	0.000286	0.0698
HN-SMG-Mucus	HN-3	14.RAW (F013065)	Neuroblast differentiation-associated protein AHNAK OS=Homo sapiens GN=AHNAK PE=1 SV=2	Q09666	SwissProt_2012_09.fasta	629104	0.998	2	2	2	0.000191	0.00594
HN-SMG-Mucus	HN-3	14.RAW (F013065)	Myoferlin OS=Homo sapiens GN=MYOF PE=1 SV=1	Q9NZM1	SwissProt_2012_09.fasta	234716	0.998	2	2	2	0.000191	0.0184
HN-SMG-Mucus	HN-3	14.RAW (F013065)	BPI fold-containing family B member 1 OS=Homo sapiens GN=BPIFB1 PE=2 SV=1	Q8TDL5	SwissProt_2012_09.fasta	52443.8	1	5	8	15	0.00143	0.169
HN-SMG-Mucus	HN-3	14.RAW (F013065)	IgGFc-binding protein OS=Homo sapiens GN=FCGBP PE=1 SV=3	Q9Y6R7	SwissProt_2012_09.fasta	571983	1	3	4	4	0.000381	0.0115
HN-SMG-Mucus	HN-3	14.RAW (F013065)	Deleted in malignant brain tumors 1 protein OS=Homo sapiens GN=DMBT1 PE=1 SV=2	Q9UGM3	SwissProt_2012_09.fasta	260726	0.998	2	2	2	0.000191	0.0149
HN-SMG-Mucus	HN-3	14.RAW (F013065)	Pyruvate kinase isozymes M1/M2 OS=Homo sapiens GN=PKM PE=1 SV=4	P14618	SwissProt_2012_09.fasta	57937.5	0.998	2	3	4	0.000381	0.0772
HN-SMG-Mucus	HN-3	14.RAW (F013065)	Keratin, type II cytoskeletal 8 OS=Homo sapiens GN=KRT8 PE=1 SV=7	P05787	SwissProt_2012_09.fasta	53706.2	1	4	4	4	0.000381	0.118
HN-SMG-Mucus	HN-3	14.RAW (F013065)	Calmodulin OS=Homo sapiens GN=CALM1 PE=1 SV=2	P62158	SwissProt_2012_09.fasta	16838	0.996	2	3	3	0.000286	0.201
HN-SMG-Mucus	HN-3	14.RAW (F013065)	ATP synthase subunit beta, mitochondrial OS=Homo sapiens GN=ATP5B PE=1 SV=3	P06576	SwissProt_2012_09.fasta	56560.6	1	3	4	5	0.000477	0.0945
HN-SMG-Mucus	HN-3	14.RAW (F013065)	Heat shock protein HSP 90-beta OS=Homo sapiens GN=HSP90AB1 PE=1 SV=4	P08238	SwissProt_2012_09.fasta	83267.3	0.998	2	2	2	0.000191	0.0414
HN-SMG-Mucus	HN-3	14.RAW (F013065)	Keratin, type I cytoskeletal 19 OS=Homo sapiens GN=KRT19 PE=1 SV=4	P08727	SwissProt_2012_09.fasta	44107.1	1	2	3	3	0.000286	0.075
HN-SMG-Mucus	HN-3	14.RAW (F013065)	Lactotransferrin OS=Homo sapiens GN=LTF PE=1 SV=6	P02788	SwissProt_2012_09.fasta	78182.3	1	9	10	13	0.00124	0.199
HN-SMG-Mucus	HN-3	15.RAW (F013066)	Deleted in malignant brain tumors 1 protein OS=Homo sapiens GN=DMBT1 PE=1 SV=2	Q9UGM3	SwissProt_2012_09.fasta	260726	1	5	6	6	0.000533	0.0224
HN-SMG-Mucus	HN-3	15.RAW (F013066)	Major vault protein OS=Homo sapiens GN=MVP PE=1 SV=4	Q14764	SwissProt_2012_09.fasta	99326	1	2	2	2	0.000178	0.0347
HN-SMG-Mucus	HN-3	15.RAW (F013066)	Fibrinogen beta chain OS=Homo sapiens GN=FGB PE=1 SV=2	P02675	SwissProt_2012_09.fasta	55928.6	1	3	4	4	0.000355	0.0978
HN-SMG-Mucus	HN-3	15.RAW (F013066)	ATP synthase subunit alpha, mitochondrial OS=Homo sapiens GN=ATP5A1 PE=1 SV=1	P25705	SwissProt_2012_09.fasta	59752.1	0.998	2	3	4	0.000355	0.0561
HN-SMG-Mucus	HN-3	15.RAW (F013066)	Fibrinogen alpha chain OS=Homo sapiens GN=FGA PE=1 SV=2	P02671	SwissProt_2012_09.fasta	94973.4	0.998	2	2	2	0.000178	0.03
HN-SMG-Mucus	HN-3	15.RAW (F013066)	Lumican OS=Homo sapiens GN=LUM PE=1 SV=2	P51884	SwissProt_2012_09.fasta	38431.5	1	3	3	3	0.000266	0.0947
HN-SMG-Mucus	HN-3	15.RAW (F013066)	Tubulin beta chain OS=Homo sapiens GN=TUBB PE=1 SV=2	P07437	SwissProt_2012_09.fasta	49670.6	1	4	7	11	0.000977	0.128
HN-SMG-Mucus	HN-3	15.RAW (F013066)	Heat shock protein HSP 90-beta OS=Homo sapiens GN=HSP90AB1 PE=1 SV=4	P08238	SwissProt_2012_09.fasta	83267.3	1	2	2	2	0.000178	0.0359
HN-SMG-Mucus	HN-3	15.RAW (F013066)	Keratin, type I cytoskeletal 18 OS=Homo sapiens GN=KRT18 PE=1 SV=2	P05783	SwissProt_2012_09.fasta	48059	0.999	2	5	5	0.000444	0.0488
HN-SMG-Mucus	HN-3	15.RAW (F013066)	Galectin-3-binding protein OS=Homo sapiens GN=LGALS3BP PE=1 SV=1	Q08380	SwissProt_2012_09.fasta	65332.1	0.998	2	2	2	0.000178	0.0479
HN-SMG-Mucus	HN-3	15.RAW (F013066)	Retinal dehydrogenase 1 OS=Homo sapiens GN=ALDH1A1 PE=1 SV=2	P00352	SwissProt_2012_09.fasta	54862.8	0.998	2	2	2	0.000178	0.0719
HN-SMG-Mucus	HN-3	15.RAW (F013066)	Actin, cytoplasmic 2 OS=Homo sapiens GN=ACTG1 PE=1 SV=1	P63261	SwissProt_2012_09.fasta	41793.9	1	5	9	12	0.00107	0.232
HN-SMG-Mucus	HN-3	15.RAW (F013066)	Moesin OS=Homo sapiens GN=MSN PE=1 SV=3	P26038	SwissProt_2012_09.fasta	67821.8	0.998	2	3	3	0.000266	0.0364
HN-SMG-Mucus	HN-3	15.RAW (F013066)	78 kDa glucose-regulated protein OS=Homo sapiens GN=HSPA5 PE=1 SV=2	P11021	SwissProt_2012_09.fasta	72334.7	1	6	6	8	0.000711	0.122
HN-SMG-Mucus	HN-3	15.RAW (F013066)	Ribosome-binding protein 1 OS=Homo sapiens GN=RRBP1 PE=1 SV=4	Q9P2E9	SwissProt_2012_09.fasta	152471	1	3	3	3	0.000266	0.0255
HN-SMG-Mucus	HN-3	15.RAW (F013066)	Keratin, type II cytoskeletal 5 OS=Homo sapiens GN=KRT5 PE=1 SV=3	P13647	SwissProt_2012_09.fasta	62379.6	1	12	13	13	0.00115	0.19
HN-SMG-Mucus	HN-3	15.RAW (F013066)	Keratin, type I cytoskeletal 10 OS=Homo sapiens GN=KRT10 PE=1 SV=6	P13645	SwissProt_2012_09.fasta	58828.8	0.998	2	2	3	0.000266	0.036
HN-SMG-Mucus	HN-3	15.RAW (F013066)	Prohibitin-2 OS=Homo sapiens GN=PHB2 PE=1 SV=2	Q99623	SwissProt_2012_09.fasta	33297.6	0.998	2	2	2	0.000178	0.11
HN-SMG-Mucus	HN-3	15.RAW (F013066)	Serine/arginine-rich splicing factor 1 OS=Homo sapiens GN=SRSF1 PE=1 SV=2	Q07955	SwissProt_2012_09.fasta	27745.1	1	3	3	4	0.000355	0.109
HN-SMG-Mucus	HN-3	15.RAW (F013066)	Heterogeneous nuclear ribonucleoprotein K OS=Homo sapiens GN=HNRNPK PE=1 SV=1	P61978	SwissProt_2012_09.fasta	50978.5	1	3	3	4	0.000355	0.0799
HN-SMG-Mucus	HN-3	15.RAW (F013066)	Keratin, type II cytoskeletal 6A OS=Homo sapiens GN=KRT6A PE=1 SV=3	P02538	SwissProt_2012_09.fasta	60046.4	1	3	3	3	0.000266	0.161
HN-SMG-Mucus	HN-3	15.RAW (F013066)	Cytochrome c oxidase subunit 5B, mitochondrial OS=Homo sapiens GN=COX5B PE=1 SV=2	P10606	SwissProt_2012_09.fasta	13695.7	0.998	2	3	3	0.000266	0.194
HN-SMG-Mucus	HN-3	15.RAW (F013066)	Peptidyl-prolyl cis-trans isomerase B OS=Homo sapiens GN=PPIB PE=1 SV=2	P23284	SwissProt_2012_09.fasta	23743.2	0.998	2	2	2	0.000178	0.116
HN-SMG-Mucus	HN-3	15.RAW (F013066)	Tubulin alpha-1B chain OS=Homo sapiens GN=TUBA1B PE=1 SV=1	P68363	SwissProt_2012_09.fasta	50151.7	1	4	4	4	0.000355	0.137
HN-SMG-Mucus	HN-3	15.RAW (F013066)	Transketolase OS=Homo sapiens GN=TKT PE=1 SV=3	P29401	SwissProt_2012_09.fasta	67879.4	1	4	5	5	0.000444	0.0883
HN-SMG-Mucus	HN-3	15.RAW (F013066)	Keratin, type II cytoskeletal 1 OS=Homo sapiens GN=KRT1 PE=1 SV=6	P04264	SwissProt_2012_09.fasta	66040.3	1	4	4	4	0.000355	0.0994
HN-SMG-Mucus	HN-3	15.RAW (F013066)	Protein disulfide-isomerase OS=Homo sapiens GN=P4HB PE=1 SV=3	P07237	SwissProt_2012_09.fasta	57118.1	1	4	5	5	0.000444	0.124
HN-SMG-Mucus	HN-3	15.RAW (F013066)	Sodium/potassium-transporting ATPase subunit alpha-1 OS=Homo sapiens GN=ATP1A1 PE=1 SV=1	P05023	SwissProt_2012_09.fasta	112900	1	5	5	5	0.000444	0.0479
HN-SMG-Mucus	HN-3	15.RAW (F013066)	Keratin, type II cytoskeletal 8 OS=Homo sapiens GN=KRT8 PE=1 SV=7	P05787	SwissProt_2012_09.fasta	53706.2	1	5	7	11	0.000977	0.149
HN-SMG-Mucus	HN-3	15.RAW (F013066)	Histone H4 OS=Homo sapiens GN=HIST1H4A PE=1 SV=2	P62805	SwissProt_2012_09.fasta	11367.7	1	3	5	8	0.000711	0.34
HN-SMG-Mucus	HN-3	15.RAW (F013066)	Apolipoprotein A-I OS=Homo sapiens GN=APOA1 PE=1 SV=1	P02647	SwissProt_2012_09.fasta	30778.5	1	3	3	3	0.000266	0.15
HN-SMG-Mucus	HN-3	15.RAW (F013066)	Aconitate hydratase, mitochondrial OS=Homo sapiens GN=ACO2 PE=1 SV=2	Q99798	SwissProt_2012_09.fasta	85428	1	2	2	2	0.000178	0.0397
HN-SMG-Mucus	HN-3	15.RAW (F013066)	Heat shock cognate 71 kDa protein OS=Homo sapiens GN=HSPA8 PE=1 SV=1	P11142	SwissProt_2012_09.fasta	70899.8	1	4	4	4	0.000355	0.0759
HN-SMG-Mucus	HN-3	15.RAW (F013066)	Annexin A2 OS=Homo sapiens GN=ANXA2 PE=1 SV=2	P07355	SwissProt_2012_09.fasta	38606.1	1	4	6	7	0.000622	0.103
HN-SMG-Mucus	HN-3	15.RAW (F013066)	Annexin A1 OS=Homo sapiens GN=ANXA1 PE=1 SV=2	P04083	SwissProt_2012_09.fasta	38715.9	1	3	4	5	0.000444	0.124
HN-SMG-Mucus	HN-3	15.RAW (F013066)	Complement factor H OS=Homo sapiens GN=CFH PE=1 SV=4	P08603	SwissProt_2012_09.fasta	139096	1	2	2	2	0.000178	0.0187
HN-SMG-Mucus	HN-3	15.RAW (F013066)	60S ribosomal protein L6 OS=Homo sapiens GN=RPL6 PE=1 SV=3	Q02878	SwissProt_2012_09.fasta	32729.3	0.998	2	2	2	0.000178	0.066
HN-SMG-Mucus	HN-3	15.RAW (F013066)	Heterogeneous nuclear ribonucleoprotein H OS=Homo sapiens GN=HNRNPH1 PE=1 SV=4	P31943	SwissProt_2012_09.fasta	49229.8	1	3	4	4	0.000355	0.1
HN-SMG-Mucus	HN-3	15.RAW (F013066)	Calmodulin OS=Homo sapiens GN=CALM1 PE=1 SV=2	P62158	SwissProt_2012_09.fasta	16838	1	3	4	4	0.000355	0.208
HN-SMG-Mucus	HN-3	15.RAW (F013066)	Myosin-14 OS=Homo sapiens GN=MYH14 PE=1 SV=2	Q7Z406	SwissProt_2012_09.fasta	227873	0.998	2	2	2	0.000178	0.012
HN-SMG-Mucus	HN-3	15.RAW (F013066)	Clusterin OS=Homo sapiens GN=CLU PE=1 SV=1	P10909	SwissProt_2012_09.fasta	52495	0.998	2	2	3	0.000266	0.0267
HN-SMG-Mucus	HN-3	15.RAW (F013066)	Heat shock 70 kDa protein 1A/1B OS=Homo sapiens GN=HSPA1A PE=1 SV=5	P08107	SwissProt_2012_09.fasta	70054	0.998	2	2	2	0.000178	0.0359
HN-SMG-Mucus	HN-3	15.RAW (F013066)	Complement C3 OS=Homo sapiens GN=C3 PE=1 SV=2	P01024	SwissProt_2012_09.fasta	187149	1	7	8	8	0.000711	0.0583
HN-SMG-Mucus	HN-3	15.RAW (F013066)	Mucin-5B OS=Homo sapiens GN=MUC5B PE=1 SV=3	Q9HC84	SwissProt_2012_09.fasta	596324	1	16	17	19	0.00169	0.0425
HN-SMG-Mucus	HN-3	15.RAW (F013066)	Lactotransferrin OS=Homo sapiens GN=LTF PE=1 SV=6	P02788	SwissProt_2012_09.fasta	78182.3	1	11	13	21	0.00187	0.204
HN-SMG-Mucus	HN-3	15.RAW (F013066)	Alpha-1-antichymotrypsin OS=Homo sapiens GN=SERPINA3 PE=1 SV=2	P01011	SwissProt_2012_09.fasta	47653	0.998	2	5	6	0.000533	0.0378
HN-SMG-Mucus	HN-3	15.RAW (F013066)	Heterogeneous nuclear ribonucleoprotein A3 OS=Homo sapiens GN=HNRNPA3 PE=1 SV=2	P51991	SwissProt_2012_09.fasta	39595.1	0.998	2	2	2	0.000178	0.0767
HN-SMG-Mucus	HN-3	15.RAW (F013066)	Vitamin D-binding protein OS=Homo sapiens GN=GC PE=1 SV=1	P02774	SwissProt_2012_09.fasta	52964.6	0.998	2	2	2	0.000178	0.0886
HN-SMG-Mucus	HN-3	15.RAW (F013066)	Lymphocyte antigen 6D OS=Homo sapiens GN=LY6D PE=1 SV=1	Q14210	SwissProt_2012_09.fasta	13286.3	0.998	2	2	2	0.000178	0.164
HN-SMG-Mucus	HN-3	15.RAW (F013066)	Isocitrate dehydrogenase [NADP], mitochondrial OS=Homo sapiens GN=IDH2 PE=1 SV=2	P48735	SwissProt_2012_09.fasta	50910.4	1	4	4	5	0.000444	0.102
HN-SMG-Mucus	HN-3	15.RAW (F013066)	Serum albumin OS=Homo sapiens GN=ALB PE=1 SV=2	P02768	SwissProt_2012_09.fasta	69366.9	1	8	11	16	0.00142	0.135
HN-SMG-Mucus	HN-3	15.RAW (F013066)	Plectin OS=Homo sapiens GN=PLEC PE=1 SV=3	Q15149	SwissProt_2012_09.fasta	531784	1	4	4	4	0.000355	0.00982
HN-SMG-Mucus	HN-3	15.RAW (F013066)	Malate dehydrogenase, mitochondrial OS=Homo sapiens GN=MDH2 PE=1 SV=3	P40926	SwissProt_2012_09.fasta	35503.7	0.998	2	2	2	0.000178	0.101
HN-SMG-Mucus	HN-3	15.RAW (F013066)	Keratin, type I cytoskeletal 13 OS=Homo sapiens GN=KRT13 PE=1 SV=4	P13646	SwissProt_2012_09.fasta	49589.3	1	3	3	5	0.000444	0.103
HN-SMG-Mucus	HN-3	15.RAW (F013066)	Stress-70 protein, mitochondrial OS=Homo sapiens GN=HSPA9 PE=1 SV=2	P38646	SwissProt_2012_09.fasta	73681.3	1	4	4	4	0.000355	0.081
HN-SMG-Mucus	HN-3	15.RAW (F013066)	Keratin, type II cytoskeletal 7 OS=Homo sapiens GN=KRT7 PE=1 SV=5	P08729	SwissProt_2012_09.fasta	51387.3	1	3	3	3	0.000266	0.0746
HN-SMG-Mucus	HN-3	15.RAW (F013066)	40S ribosomal protein S3a OS=Homo sapiens GN=RPS3A PE=1 SV=2	P61247	SwissProt_2012_09.fasta	29945.3	1	3	4	4	0.000355	0.136
HN-SMG-Mucus	HN-3	15.RAW (F013066)	Annexin A5 OS=Homo sapiens GN=ANXA5 PE=1 SV=2	P08758	SwissProt_2012_09.fasta	35938.6	0.998	2	2	2	0.000178	0.0594
HN-SMG-Mucus	HN-3	15.RAW (F013066)	Dihydrolipoyl dehydrogenase, mitochondrial OS=Homo sapiens GN=DLD PE=1 SV=2	P09622	SwissProt_2012_09.fasta	54177.5	0.995	2	2	2	0.000178	0.0472
HN-SMG-Mucus	HN-3	15.RAW (F013066)	Pyruvate kinase isozymes M1/M2 OS=Homo sapiens GN=PKM PE=1 SV=4	P14618	SwissProt_2012_09.fasta	57937.5	1	6	8	9	0.000799	0.126
HN-SMG-Mucus	HN-3	15.RAW (F013066)	Ig kappa chain C region OS=Homo sapiens GN=IGKC PE=1 SV=1	P01834	SwissProt_2012_09.fasta	11608.6	0.998	2	3	3	0.000266	0.16
HN-SMG-Mucus	HN-3	15.RAW (F013066)	Polymeric immunoglobulin receptor OS=Homo sapiens GN=PIGR PE=1 SV=4	P01833	SwissProt_2012_09.fasta	83283.4	1	3	3	3	0.000266	0.0602
HN-SMG-Mucus	HN-3	15.RAW (F013066)	Histone H2A type 1 OS=Homo sapiens GN=HIST1H2AG PE=1 SV=2	P0C0S8,Q16777,Q6FI13,Q96KK5,Q99878,Q9BTM1	SwissProt_2012_09.fasta	13906.8	0.998	2	2	6	0.000533	0.108
HN-SMG-Mucus	HN-3	15.RAW (F013066)	Ceruloplasmin OS=Homo sapiens GN=CP PE=1 SV=1	P00450	SwissProt_2012_09.fasta	122208	0.998	2	2	2	0.000178	0.0263
HN-SMG-Mucus	HN-3	15.RAW (F013066)	IgGFc-binding protein OS=Homo sapiens GN=FCGBP PE=1 SV=3	Q9Y6R7	SwissProt_2012_09.fasta	571983	1	6	7	7	0.000622	0.0144
HN-SMG-Mucus	HN-3	15.RAW (F013066)	Keratin, type I cytoskeletal 19 OS=Homo sapiens GN=KRT19 PE=1 SV=4	P08727	SwissProt_2012_09.fasta	44107.1	1	11	14	22	0.00195	0.333
HN-SMG-Mucus	HN-3	15.RAW (F013066)	Alpha-1-antitrypsin OS=Homo sapiens GN=SERPINA1 PE=1 SV=3	P01009	SwissProt_2012_09.fasta	46737.9	0.997	2	2	2	0.000178	0.055
HN-SMG-Mucus	HN-3	15.RAW (F013066)	Amine oxidase [flavin-containing] A OS=Homo sapiens GN=MAOA PE=1 SV=1	P21397	SwissProt_2012_09.fasta	59682.5	0.998	2	2	2	0.000178	0.0607
HN-SMG-Mucus	HN-3	15.RAW (F013066)	Serpin B3 OS=Homo sapiens GN=SERPINB3 PE=1 SV=2	P29508	SwissProt_2012_09.fasta	44565.9	0.998	2	2	2	0.000178	0.0615
HN-SMG-Mucus	HN-3	15.RAW (F013066)	Clathrin heavy chain 1 OS=Homo sapiens GN=CLTC PE=1 SV=5	Q00610	SwissProt_2012_09.fasta	191619	1	8	9	9	0.000799	0.0525
HN-SMG-Mucus	HN-3	15.RAW (F013066)	Beta-2-microglobulin OS=Homo sapiens GN=B2M PE=1 SV=1	P61769	SwissProt_2012_09.fasta	13714.9	0.998	2	2	2	0.000178	0.168
HN-SMG-Mucus	HN-3	15.RAW (F013066)	Protein disulfide-isomerase A3 OS=Homo sapiens GN=PDIA3 PE=1 SV=4	P30101	SwissProt_2012_09.fasta	56784.6	0.998	2	2	2	0.000178	0.0693
HN-SMG-Mucus	HN-3	15.RAW (F013066)	Triosephosphate isomerase OS=Homo sapiens GN=TPI1 PE=1 SV=3	P60174	SwissProt_2012_09.fasta	30790.8	0.998	2	2	2	0.000178	0.0909
HN-SMG-Mucus	HN-3	15.RAW (F013066)	Spectrin alpha chain, non-erythrocytic 1 OS=Homo sapiens GN=SPTAN1 PE=1 SV=3	Q13813	SwissProt_2012_09.fasta	284543	0.998	2	2	2	0.000178	0.0125
HN-SMG-Mucus	HN-3	15.RAW (F013066)	40S ribosomal protein S9 OS=Homo sapiens GN=RPS9 PE=1 SV=3	P46781	SwissProt_2012_09.fasta	22592.5	0.999	2	2	2	0.000178	0.0876
HN-SMG-Mucus	HN-3	15.RAW (F013066)	Myosin-9 OS=Homo sapiens GN=MYH9 PE=1 SV=4	P35579	SwissProt_2012_09.fasta	226538	1	10	10	10	0.000888	0.0714
HN-SMG-Mucus	HN-3	15.RAW (F013066)	Hemoglobin subunit beta OS=Homo sapiens GN=HBB PE=1 SV=2	P68871	SwissProt_2012_09.fasta	15998	1	2	2	2	0.000178	0.136
HN-SMG-Mucus	HN-3	15.RAW (F013066)	Prelamin-A/C OS=Homo sapiens GN=LMNA PE=1 SV=1	P02545	SwissProt_2012_09.fasta	74140.7	1	4	4	4	0.000355	0.0663
HN-SMG-Mucus	HN-3	15.RAW (F013066)	T-complex protein 1 subunit zeta OS=Homo sapiens GN=CCT6A PE=1 SV=3	P40227	SwissProt_2012_09.fasta	58025.3	0.998	2	2	2	0.000178	0.0414
HN-SMG-Mucus	HN-3	15.RAW (F013066)	Zinc-alpha-2-glycoprotein OS=Homo sapiens GN=AZGP1 PE=1 SV=2	P25311	SwissProt_2012_09.fasta	34258.6	1	3	4	5	0.000444	0.124
HN-SMG-Mucus	HN-3	15.RAW (F013066)	Alpha-actinin-4 OS=Homo sapiens GN=ACTN4 PE=1 SV=2	O43707	SwissProt_2012_09.fasta	104857	1	3	3	3	0.000266	0.0395
HN-SMG-Mucus	HN-3	15.RAW (F013066)	Ornithine aminotransferase, mitochondrial OS=Homo sapiens GN=OAT PE=1 SV=1	P04181	SwissProt_2012_09.fasta	48536.2	0.999	2	2	2	0.000178	0.0638
HN-SMG-Mucus	HN-3	15.RAW (F013066)	CD166 antigen OS=Homo sapiens GN=ALCAM PE=1 SV=2	Q13740	SwissProt_2012_09.fasta	65103.8	0.998	2	3	3	0.000266	0.048
HN-SMG-Mucus	HN-3	15.RAW (F013066)	Filamin-B OS=Homo sapiens GN=FLNB PE=1 SV=2	O75369	SwissProt_2012_09.fasta	278159	0.998	2	2	3	0.000266	0.00884
HN-SMG-Mucus	HN-3	15.RAW (F013066)	Galectin-3 OS=Homo sapiens GN=LGALS3 PE=1 SV=5	P17931	SwissProt_2012_09.fasta	26152.8	0.998	2	2	2	0.000178	0.088
HN-SMG-Mucus	HN-3	15.RAW (F013066)	Transaldolase OS=Homo sapiens GN=TALDO1 PE=1 SV=2	P37837	SwissProt_2012_09.fasta	37541.7	0.998	2	2	2	0.000178	0.0682
HN-SMG-Mucus	HN-3	15.RAW (F013066)	Haptoglobin OS=Homo sapiens GN=HP PE=1 SV=1	P00738	SwissProt_2012_09.fasta	45204.9	0.998	2	2	2	0.000178	0.0542
HN-SMG-Mucus	HN-3	15.RAW (F013066)	BPI fold-containing family B member 1 OS=Homo sapiens GN=BPIFB1 PE=2 SV=1	Q8TDL5	SwissProt_2012_09.fasta	52443.8	1	6	9	18	0.0016	0.194
HN-SMG-Mucus	HN-3	15.RAW (F013066)	Keratin, type I cytoskeletal 17 OS=Homo sapiens GN=KRT17 PE=1 SV=2	Q04695	SwissProt_2012_09.fasta	48106.7	1	3	3	3	0.000266	0.104
HN-SMG-Mucus	HN-3	15.RAW (F013066)	Tropomyosin alpha-3 chain OS=Homo sapiens GN=TPM3 PE=1 SV=1	P06753	SwissProt_2012_09.fasta	32820.2	1	2	2	2	0.000178	0.0563
HN-SMG-Mucus	HN-3	15.RAW (F013066)	Serum amyloid A-1 protein OS=Homo sapiens GN=SAA1 PE=1 SV=1	P0DJI8	SwissProt_2012_09.fasta	13532.6	0.998	2	3	3	0.000266	0.295
HN-SMG-Mucus	HN-3	15.RAW (F013066)	Nucleophosmin OS=Homo sapiens GN=NPM1 PE=1 SV=2	P06748	SwissProt_2012_09.fasta	32575.5	0.998	2	2	2	0.000178	0.139
HN-SMG-Mucus	HN-3	15.RAW (F013066)	Glucose-6-phosphate 1-dehydrogenase OS=Homo sapiens GN=G6PD PE=1 SV=4	P11413	SwissProt_2012_09.fasta	59258.1	0.998	2	2	2	0.000178	0.0311
HN-SMG-Mucus	HN-3	15.RAW (F013066)	Tumor-associated calcium signal transducer 2 OS=Homo sapiens GN=TACSTD2 PE=1 SV=3	P09758	SwissProt_2012_09.fasta	35709.8	1	3	3	3	0.000266	0.139
HN-SMG-Mucus	HN-3	15.RAW (F013066)	Elongation factor 1-alpha 1 OS=Homo sapiens GN=EEF1A1 PE=1 SV=1	P68104,Q5VTE0	SwissProt_2012_09.fasta	50141.2	1	3	5	8	0.000711	0.119
HN-SMG-Mucus	HN-3	15.RAW (F013066)	CD59 glycoprotein OS=Homo sapiens GN=CD59 PE=1 SV=1	P13987	SwissProt_2012_09.fasta	14177.2	0.998	2	2	2	0.000178	0.188
HN-SMG-Mucus	HN-3	15.RAW (F013066)	Leukocyte elastase inhibitor OS=Homo sapiens GN=SERPINB1 PE=1 SV=1	P30740	SwissProt_2012_09.fasta	42743.8	0.998	2	2	2	0.000178	0.058
HN-SMG-Mucus	HN-3	15.RAW (F013066)	Calreticulin OS=Homo sapiens GN=CALR PE=1 SV=1	P27797	SwissProt_2012_09.fasta	48142.9	0.998	2	2	2	0.000178	0.0671
HN-SMG-Mucus	HN-3	15.RAW (F013066)	Catenin delta-1 OS=Homo sapiens GN=CTNND1 PE=1 SV=1	O60716	SwissProt_2012_09.fasta	108172	1	3	3	3	0.000266	0.0413
HN-SMG-Mucus	HN-3	15.RAW (F013066)	Phosphoglycerate kinase 1 OS=Homo sapiens GN=PGK1 PE=1 SV=3	P00558	SwissProt_2012_09.fasta	44615.3	0.998	2	2	2	0.000178	0.0624
END OF FILE
